# Supplementary material for: Transcriptome Analysis of the Cecal Tonsil of Jingxing Yellow Chickens Revealed the Mechanism of Differential Resistance to Salmonella
Source: MDPI journal article supplement (doi:10.3390/genes10120979), 2019-11-28
Supplement: s1 [file genes-625089-supplementary.xlsx]

## Sheet: Table S1
Sample	Raw Data		Valid Data
	Read(Mb)	Base （Gb）	Read (Mb)	Base（Gb）	Q20%	Q30%	GC content (%)	mapped reads	mapping ratio (%)
R1	50.8916	7.63375	49.0518	6.57223	98.1036	94.321	49.0276	45.8501	93.4728
R2	49.2821	7.39231	47.3326	6.34663	97.8251	93.7303	48.4078	44.137	93.2486
R3	47.1355	7.07032	45.871	6.12601	98.1753	94.4598	49.0157	42.9902	93.7196
R4	52.0025	7.80037	49.7452	6.67151	97.6533	93.3182	48.7669	46.168	92.809
R5	48.118	7.21769	46.1219	6.18222	98.0622	94.204	49.1724	42.9163	93.0498
R6	50.2162	7.53244	48.2192	6.46038	97.8284	93.7248	48.5217	44.9416	93.2028
R7	47.7788	7.16682	45.5496	6.10602	97.8316	93.7422	48.4326	42.3868	93.0564
S1	49.9254	7.48881	47.2398	6.31884	97.9365	93.9817	48.7863	43.5766	92.2454
S2	45.922	6.8883	43.5285	5.81675	98.0644	94.299	49.182	40.051	92.0111
S3	50.2424	7.53636	47.4982	6.36282	98.0257	94.1516	49.2916	44.0385	92.7162
S4	44.7397	6.71095	42.1195	5.62434	98.0683	94.3106	49.1175	38.8051	92.1308
S5	47.8932	7.18398	45.8375	6.12157	98.0909	94.3173	48.7905	42.5423	92.8112
S6	44.3659	6.65488	42.4267	5.6784	97.9582	93.998	49.0399	39.3126	92.66
S7	45.4777	6.82166	42.751	5.66202	97.9351	93.9865	49.5305	38.9897	91.2019

## Sheet: Table S2 
The screened DEGs (FC≥2;padi<0.05) in this study
Gene ID	Gene name	Chromosome	Gene_start	Gene_end	log2FoldChange	pvalue	padj	trend	R1	R2	R3	R4	R5	R6	R7	S1	S2	S3	S4	S5	S7	S6
ENSGALG00000003765	A1CF	6	9823720	9844029	1.44597	4.5e-05	0.000151068	up	495	654	467	245	383	485	715	50	111	34	192	299	137	223
ENSGALG00000041911	AAK1	22	36222	90601	1.39886	9.4e-21	3.84e-19	up	417	373	301	345	359	376	434	68	97	95	157	163	104	111
ENSGALG00000015433	ABCA1	Z	54725868	54817218	1.9903	2.83e-25	2.3e-23	up	694	759	404	390	553	415	468	111	98	121	107	127	64	113
ENSGALG00000007788	ABCB7	4	12565032	12592136	1.17558	4.08e-16	8.14e-15	up	591	477	432	430	435	364	436	95	159	137	162	248	154	176
ENSGALG00000031243	ABCB8	KQ759368.1	17815	24254	1.02195	1.13e-14	1.81e-13	down	433	543	632	749	673	736	687	1195	980	917	1098	1013	949	1026
ENSGALG00000016896	ABCC4	1	146127088	146275409	1.7621	2.93e-12	3.19e-11	up	865	936	495	444	620	485	839	84	120	114	192	333	128	156
ENSGALG00000038152	ABCC6	14	7732655	7756484	1.05474	7.69e-15	1.27e-13	down	295	462	386	343	388	369	351	566	601	771	596	558	500	703
ENSGALG00000042554	ABCD2	1	15281148	15323045	1.38762	9.84e-16	1.85e-14	up	448	330	341	333	349	195	345	84	81	115	91	156	86	103
ENSGALG00000016164	ABCG1	1	109319985	109372658	2.38575	8.19e-23	4.71e-21	up	123	178	95	126	104	72	89	10	18	19	13	24	14	23
ENSGALG00000015378	ABHD10	1	88560955	88564092	1.30829	2.58e-09	1.75e-08	up	89	83	69	73	67	82	73	13	21	11	26	36	26	42
ENSGALG00000038589	ABHD14B	12	3128934	3130131	1.15472	3.87e-16	7.79e-15	down	166	252	259	212	291	292	251	479	393	381	484	434	424	466
ENSGALG00000006689	ABHD2	10	12988140	13012103	2.77785	2.14e-10	1.71e-09	up	642	534	194	179	245	256	569	14	28	9	42	135	44	45
ENSGALG00000008714	ABI2	7	13652565	13706800	1.44405	1.09e-20	4.42e-19	up	1077	867	1034	1154	1142	1043	1246	215	318	271	423	466	188	365
ENSGALG00000003875	ABL1	17	6472913	6500584	1.08484	4.57e-17	1.06e-15	up	1924	1570	1517	1880	1942	2196	2389	547	709	725	687	1108	616	694
ENSGALG00000002790	ABLIM3	13	8543269	8558770	1.12677	3.67e-10	2.83e-09	down	127	168	152	197	168	175	208	326	310	414	311	211	234	247
ENSGALG00000019663	ACBD7	2	20648060	20650838	1.48119	1.4e-12	1.61e-11	down	44	29	33	54	58	54	34	119	75	88	118	81	78	118
ENSGALG00000000755	ACER3	1	193390265	193443628	1.28293	1.66e-12	1.88e-11	up	175	185	144	102	117	139	194	42	46	40	60	68	50	42
ENSGALG00000016919	ACOD1	1	154478654	154500025	1.02809	0.011654	0.0241146	up	143	116	135	388	196	24	59	60	81	63	31	50	57	66
ENSGALG00000006842	ACOT8	20	10717674	10719929	1.08631	4.16e-31	7.4e-29	down	711	682	756	937	739	952	724	1288	1457	1304	1368	1395	1203	1297
ENSGALG00000008632	ACSS1	3	15852650	15884502	1.00396	6.33e-07	2.92e-06	up	376	527	384	311	381	328	419	98	147	140	152	314	139	115
ENSGALG00000011086	ACTA1	3	40139164	40141584	1.11228	1.77e-05	6.39e-05	down	2769	1622	3168	3827	2737	3480	2542	5094	4686	9837	3659	4289	2890	3691
ENSGALG00000041634	ACTG2	22	2844726	2847392	1.81329	1.9e-14	2.91e-13	down	36738	25686	41503	61520	43419	49483	54776	152938	125758	207434	102063	90671	80486	99093
ENSGALG00000008779	ACTR2	3	10012981	10031445	1.62798	5.02e-21	2.13e-19	up	4139	3640	3036	3514	2753	2697	3274	518	767	541	915	1474	922	905
ENSGALG00000013838	ADAM20	5	27440008	27442306	1.1135	0.00631173	0.0139127	down	10	8	10	13	10	18	10	14	29	33	4	9	26	20
ENSGALG00000008976	ADAM22	2	20936305	21002401	1.66358	4.41e-10	3.35e-09	up	68	67	43	72	110	121	104	11	16	21	23	32	17	29
ENSGALG00000039219	ADAMTS14	6	11545754	11563815	1.41764	3.45e-12	3.69e-11	up	162	124	111	141	156	175	179	23	45	33	74	64	41	36
ENSGALG00000001407	ADAMTS15	24	1676278	1685806	1.44892	1.47e-14	2.3e-13	up	234	163	149	178	257	286	294	55	57	66	79	86	62	52
ENSGALG00000038688	ADAMTS17	10	17119378	17280787	1.02654	0.000505491	0.001394	up	22	22	20	23	20	16	25	12	5	5	9	13	5	9
ENSGALG00000032974	ADAMTS2	13	13664069	13829628	2.1909	1.71e-44	2.11e-41	up	876	692	481	741	719	660	950	109	144	163	143	113	93	124
ENSGALG00000015795	ADAMTS5	1	103067330	103106355	1.60239	7.47e-11	6.47e-10	up	73	46	50	77	76	88	103	12	12	17	28	20	17	29
ENSGALG00000001370	ADAMTS8	24	1657703	1668923	1.60841	1.94e-27	2.14e-25	up	238	299	302	238	282	292	291	70	44	71	86	93	65	81
ENSGALG00000002955	ADAMTSL2	17	7446665	7466142	1.2933	2.67e-08	1.54e-07	down	776	640	625	1094	790	562	862	2356	1094	1849	1365	919	1461	1076
ENSGALG00000024298	ADAMTSL5	28	3256975	3261306	1.44384	1.33e-06	5.8e-06	down	14	15	28	17	43	35	30	48	73	87	43	40	59	43
ENSGALG00000000908	ADAT1	11	20121097	20141797	1.11234	2.17e-08	1.27e-07	down	416	404	443	819	673	493	402	974	904	1250	829	691	770	777
ENSGALG00000003837	ADCY7	11	6648795	6702833	1.03466	4.71e-13	5.83e-12	up	736	679	528	598	510	382	479	196	239	173	235	252	241	188
ENSGALG00000043209	ADGRB2	23	5006341	5016331	1.15636	8.47e-05	0.000270108	down	28	22	50	80	51	43	43	96	102	118	65	42	55	75
ENSGALG00000002557	ADGRD1	15	3066200	3191098	1.08012	4.78e-06	1.89e-05	up	159	109	202	170	146	116	147	20	49	87	50	65	71	54
ENSGALG00000016723	ADGRF2	3	110542296	110545583	1.08857	0.00576884	0.0128446	down	9	12	7	15	22	3	17	27	31	13	27	10	11	24
ENSGALG00000013803	ADGRG6	3	53020301	53127121	1.28355	4.06e-15	6.9e-14	up	327	246	175	240	335	338	296	73	83	85	106	128	84	86
ENSGALG00000011319	ADGRL3	4	48307262	48698041	1.22166	5.61e-19	1.75e-17	up	207	186	179	247	250	236	240	82	76	60	84	69	90	65
ENSGALG00000008890	ADGRL4	8	18389085	18659243	1.59457	7.62e-17	1.72e-15	up	273	251	321	354	391	255	374	39	67	115	72	105	86	104
ENSGALG00000005554	ADIPOQ	9	5223114	5225251	1.04316	3.56e-06	1.44e-05	down	2107	1718	2528	3632	3477	3152	4007	5825	5021	7322	4026	4081	3112	3925
ENSGALG00000035533	ADIPOR2	1	60997447	61037837	1.41081	4.19e-11	3.76e-10	up	2239	1795	1304	1315	1406	1681	2166	274	465	314	634	939	546	466
ENSGALG00000006642	ADORA2A	15	8526761	8536246	1.79364	8.56e-14	1.18e-12	up	91	98	104	134	83	58	75	17	14	11	19	36	23	29
ENSGALG00000040035	ADRB2	13	8649968	8651161	1.52637	2.17e-17	5.35e-16	up	81	126	99	138	116	102	133	18	24	31	33	41	33	41
ENSGALG00000011618	ADSSL1	5	51625809	51648726	1.12239	6.25e-08	3.38e-07	up	665	370	374	365	442	580	666	103	176	112	239	260	203	191
ENSGALG00000032683	ADTRP	2	63095842	63126232	1.19357	0.00807418	0.0173855	down	5	5	6	7	8	7	10	21	16	14	19	3	4	9
ENSGALG00000015556	AFAP1	4	81124238	81182713	1.06073	3.86e-17	9.06e-16	up	428	369	340	466	401	330	429	100	133	185	160	168	126	185
ENSGALG00000011329	AFDN	3	42235566	42347326	1.44354	3.97e-15	6.77e-14	up	2098	2069	1470	1400	1776	1791	2614	370	512	353	645	946	487	631
ENSGALG00000043935	AFF1	4	46064419	46096688	1.03119	8.88e-10	6.41e-09	up	1021	1127	618	609	855	668	1106	245	293	278	374	424	343	402
ENSGALG00000009168	AFF2	4	18260155	18518991	2.04885	3.36e-34	8.98e-32	up	299	298	239	298	236	184	250	38	49	31	43	83	47	60
ENSGALG00000030147	AFF4	13	17170799	17202684	1.1014	5.32e-14	7.64e-13	up	2258	1958	1351	1611	1759	1615	2301	464	581	543	806	969	694	760
ENSGALG00000006819	AGBL1	10	13624751	13893408	3.07611	2.09e-05	7.42e-05	up	7	15	11	11	8	6	5	0	0	0	1	1	2	2
ENSGALG00000029618	AGBL2	5	368166	371658	1.65428	6.16e-05	0.000201132	down	6	10	8	27	7	5	12	35	13	39	28	31	27	10
ENSGALG00000010792	AGMO	2	27894534	28076252	1.50659	0.00843894	0.0180973	up	41	8	11	13	10	26	24	1	4	1	18	8	2	4
ENSGALG00000043711	AGO3	23	4174718	4196516	1.25228	6.13e-32	1.19e-29	up	535	478	464	493	420	409	445	135	141	121	161	225	140	170
ENSGALG00000031932	AGPAT3	1	110164243	110252690	1.37279	2.72e-20	1.05e-18	up	347	348	403	363	438	249	501	91	115	119	105	165	113	111
ENSGALG00000019651	AGR3	2	28654654	28661465	1.34816	1.28e-05	4.73e-05	up	28	58	59	84	60	40	72	11	12	30	15	9	23	24
ENSGALG00000033677	AHCY	20	1594060	1618071	1.48814	1.37e-14	2.16e-13	up	1546	1149	1247	1578	1286	911	1049	181	348	236	389	615	317	454
ENSGALG00000013402	AHRR	2	89281165	89346954	1.4085	7.83e-05	0.000251209	up	64	101	42	51	77	121	138	22	14	12	34	21	55	19
ENSGALG00000014280	AICDA	1	75956434	75960413	4.67737	2.57e-18	7.09e-17	up	143	63	125	164	51	29	32	1	0	3	3	6	2	4
ENSGALG00000029834	AIF1L	17	6552309	6554624	2.67457	3.4e-34	8.98e-32	up	505	427	435	400	428	219	357	21	56	40	60	71	33	71
ENSGALG00000029150	AK1	17	5415468	5418841	1.41266	1.61e-12	1.83e-11	down	111	104	93	142	125	101	74	318	203	262	171	178	174	265
ENSGALG00000022739	AKAP11	1	166395611	166427361	1.41228	1.19e-17	3.04e-16	up	559	522	367	399	437	457	621	77	152	146	140	219	118	168
ENSGALG00000036240	AKAP12	3	48974017	48992482	1.33546	2.14e-22	1.15e-20	up	1039	645	779	1047	1069	1040	1268	282	266	301	361	378	255	333
ENSGALG00000006840	AKAP13	10	13979803	14002167	1.74554	1.28e-28	1.57e-26	up	1459	1294	912	1022	911	722	1008	200	244	171	292	328	223	299
ENSGALG00000012834	AKR1D1	1	56606803	56640860	1.39296	1.75e-06	7.48e-06	up	984	1210	839	1130	675	362	398	93	193	226	256	432	254	275
ENSGALG00000010211	ALDH6A1	5	37778732	37788095	1.2578	2.14e-30	3.36e-28	up	612	672	709	755	774	794	784	162	233	210	266	323	258	263
ENSGALG00000005857	ALOX5	6	17636489	17657686	1.50104	1.39e-10	1.15e-09	up	331	318	301	295	461	237	579	58	105	88	98	201	66	108
ENSGALG00000023542	ALPL	21	6616878	6622890	1.554	4.02e-11	3.62e-10	up	80	80	103	105	83	87	93	29	29	12	26	13	41	20
ENSGALG00000036346	AMH	28	2018796	2022986	1.07533	5.11e-05	0.00016941	down	28	12	18	31	34	21	24	47	56	50	38	31	22	36
ENSGALG00000008074	AMMECR1	4	13672485	13738312	1.13539	2.99e-08	1.7e-07	up	121	95	73	74	106	80	79	21	27	40	33	54	23	32
ENSGALG00000025844	AMT	12	2412853	2415010	1.04336	2.54e-11	2.35e-10	down	326	418	419	407	530	505	384	726	569	886	626	609	724	742
ENSGALG00000031312	ANAPC13	9	3658234	3661983	1.08675	7.32e-11	6.35e-10	down	103	98	163	143	151	101	141	244	309	192	198	193	186	199
ENSGALG00000029983	ANGPT1	2	131784819	131949415	1.47374	8.66e-16	1.65e-14	up	530	429	505	630	512	262	461	109	163	119	187	96	140	137
ENSGALG00000036189	ANGPT2	3	88967352	88991324	1.12017	6.62e-10	4.87e-09	up	779	1011	1039	735	743	790	618	200	295	317	343	211	304	438
ENSGALG00000040755	ANGPT4	20	10094792	10101201	1.14003	1.49e-10	1.23e-09	up	403	606	474	728	612	678	491	166	162	271	182	260	143	266
ENSGALG00000000619	ANGPTL4	28	838935	846067	1.2737	2.39e-25	1.98e-23	down	139	219	195	211	250	205	223	330	426	319	415	416	415	473
ENSGALG00000003179	ANGPTL7	21	4165638	4170019	2.00125	0.00136472	0.00345701	up	65	31	27	23	7	4	12	4	8	10	0	2	6	3
ENSGALG00000001467	ANKFY1	19	3146816	3171826	1.31892	5.78e-16	1.13e-14	up	1207	1156	769	717	830	851	1241	213	260	247	369	424	329	340
ENSGALG00000002143	ANKLE2	15	1431681	1447736	1.13378	8.26e-20	2.96e-18	up	747	803	615	714	732	634	904	187	225	226	292	372	300	280
ENSGALG00000033920	ANKMY1	17	741749	761953	1.10814	1.84e-09	1.28e-08	down	159	207	204	179	155	186	189	396	311	433	291	224	242	273
ENSGALG00000043357	ANKRD13A	15	6939266	6946547	1.0454	6.18e-13	7.48e-12	up	1213	1143	991	1122	872	901	1185	245	342	330	519	568	459	429
ENSGALG00000031210	ANKRD13C	8	29129339	29149016	1.27387	2.72e-25	2.22e-23	up	849	808	658	687	666	644	839	181	240	191	258	372	243	229
ENSGALG00000007539	ANKRD2	6	22313737	22316507	1.0772	0.0102385	0.0214835	down	6	2	5	10	9	7	4	10	10	15	9	15	10	3
ENSGALG00000015034	ANKRD29	2	103382854	103406872	2.17722	1.34e-25	1.16e-23	up	64	66	72	79	82	73	89	13	17	5	15	18	11	14
ENSGALG00000011831	ANKRD50	4	53218480	53254834	1.22727	2.34e-12	2.58e-11	up	1379	1091	1289	1907	1632	2092	2133	545	444	636	523	819	395	567
ENSGALG00000031973	ANKRD52	33	728697	744086	2.01137	1.8e-15	3.22e-14	up	516	508	339	323	320	263	428	37	49	45	96	152	72	94
ENSGALG00000030603	ANTXR1	22	156208	246299	1.27334	2.12e-07	1.06e-06	up	171	78	110	165	174	169	281	54	48	53	75	55	30	62
ENSGALG00000035505	AOAH	2	46830837	46896210	1.85918	1.67e-08	9.95e-08	up	76	88	62	73	49	27	44	9	20	14	5	7	16	21
ENSGALG00000020876	AOX2	7	11289758	11332344	1.12808	3.53e-07	1.7e-06	down	82	226	172	254	232	191	237	251	376	484	318	369	224	412
ENSGALG00000028807	AP1AR	4	57555810	57571942	1.15256	1.11e-10	9.38e-10	up	893	828	802	606	643	656	712	139	337	169	297	411	237	294
ENSGALG00000042125	AP2B1	19	4367119	4427244	1.48883	7.42e-21	3.09e-19	up	2322	1935	1619	1619	1705	1462	1913	368	489	344	530	863	564	460
ENSGALG00000004390	AP3B1	Z	22789995	22948814	1.5003	3.16e-12	3.41e-11	up	1585	1646	744	864	718	1462	1052	232	342	214	346	466	313	399
ENSGALG00000008291	AP3S2	10	20031637	20035333	1.04103	1.73e-17	4.34e-16	down	581	830	867	895	838	842	888	1255	1518	1540	1319	1207	1068	1504
ENSGALG00000011531	APAF1	1	46718811	46744193	1.55134	5.73e-11	5.06e-10	up	1488	1087	784	585	625	631	969	135	260	169	201	434	249	263
ENSGALG00000015111	APBA1	Z	34703400	34781323	1.15391	3.12e-08	1.77e-07	up	118	95	73	119	103	181	138	34	40	31	54	63	34	43
ENSGALG00000007579	APBB1IP	2	16147118	16204934	1.55327	2.16e-08	1.26e-07	up	763	679	685	956	395	234	321	113	117	148	108	216	208	185
ENSGALG00000014262	APBB2	4	69151136	69235250	1.11031	5.18e-12	5.43e-11	up	516	336	347	383	474	480	617	157	141	138	170	263	145	157
ENSGALG00000023444	APELA	4	23934181	23936941	1.50354	1.69e-06	7.24e-06	up	22	22	25	24	29	17	30	3	9	2	8	12	7	7
ENSGALG00000008651	APMAP	3	15835498	15848546	1.4809	2.53e-13	3.24e-12	up	1186	1105	869	847	866	1147	1224	220	344	126	404	470	255	289
ENSGALG00000007114	APOA1	24	5110448	5112102	1.11381	1.97e-07	9.94e-07	down	3995	2732	1876	2404	4098	2927	2528	4592	4458	4086	4802	4853	8567	3864
ENSGALG00000007109	APOA4	24	5107031	5108520	1.97757	0.0134822	0.0274857	down	357	124	25	8	52	208	194	110	220	20	864	670	948	246
ENSGALG00000006995	APOD	9	12704199	12707547	1.18507	2.93e-06	1.2e-05	down	22	33	23	24	24	25	23	27	57	73	37	60	33	30
ENSGALG00000005393	ARF1	2	2395981	2408032	1.72701	2.23e-13	2.88e-12	up	2268	1916	1477	1501	1666	1777	2242	179	382	276	489	924	458	467
ENSGALG00000004663	ARFGEF2	20	6557911	6589620	1.05503	2.62e-10	2.07e-09	up	1116	1012	691	676	819	684	1022	207	305	233	395	435	382	375
ENSGALG00000042357	ARHGAP1	5	23454031	23475701	2.57762	5.69e-31	9.58e-29	up	783	846	547	577	711	690	896	65	74	79	83	223	87	77
ENSGALG00000031843	ARHGAP18	3	58213348	58270372	1.20414	2.61e-06	1.09e-05	up	2060	1966	1246	1066	1632	1468	2070	276	516	242	690	1089	570	709
ENSGALG00000014758	ARHGAP28	2	99859993	99924312	2.21228	1.75e-14	2.7e-13	up	65	60	60	44	38	55	64	3	15	3	15	8	13	10
ENSGALG00000015077	ARHGAP31	1	80711561	80764144	1.13968	7.84e-13	9.3e-12	up	420	360	357	508	625	518	605	144	162	219	178	216	128	182
ENSGALG00000043511	ARHGAP32	24	1149631	1160969	1.0978	1.25e-06	5.5e-06	up	813	734	501	342	604	556	839	161	225	156	310	418	215	178
ENSGALG00000036101	ARHGAP35	KQ759559.1	5886	15105	1.59477	1.53e-26	1.48e-24	up	2428	2347	1811	1652	1985	2102	2822	440	580	441	535	950	508	601
ENSGALG00000003550	ARHGAP40	20	3848253	3884004	1.01717	6.23e-05	0.000203308	up	47	74	41	47	58	74	102	32	20	25	32	21	25	18
ENSGALG00000017196	ARHGAP42	1	183296518	183451526	1.26657	2.31e-06	9.66e-06	up	511	458	287	291	461	351	477	63	107	68	227	238	89	172
ENSGALG00000009992	ARHGAP5	5	34703929	34739968	1.26601	1e-10	8.5e-10	up	2654	2469	1641	1464	1831	2008	2626	451	671	403	798	1182	726	728
ENSGALG00000036819	ARHGDIG	14	12286477	12288978	1.51129	7.91e-09	4.97e-08	down	42	58	64	95	125	120	134	245	264	270	166	166	161	162
ENSGALG00000006663	ARHGEF12	24	3718300	3780408	1.23449	1.23e-13	1.64e-12	up	6311	6539	4105	3792	4634	4827	6659	1359	1567	1298	2161	2742	1658	1862
ENSGALG00000006439	ARHGEF6	4	4402043	4431398	1.39496	2.96e-19	9.59e-18	up	1160	1146	1085	1362	1001	689	796	245	296	398	255	372	310	315
ENSGALG00000014911	ARL15	Z	16203913	16414421	1.25875	6.14e-16	1.2e-14	up	149	139	99	99	122	127	134	36	40	33	36	50	42	54
ENSGALG00000008049	ARL3	6	23301878	23329691	1.93601	2.41e-28	2.92e-26	up	127	110	83	100	121	138	129	18	26	21	26	28	26	24
ENSGALG00000021021	ARL4C	7	5719533	5720111	1.16314	0.000148667	0.00045263	up	137	148	144	168	118	42	77	20	41	42	20	68	55	54
ENSGALG00000008314	ARL8B	12	18642877	18655919	1.15488	8.18e-22	3.89e-20	up	1530	1659	1333	1349	1465	1488	1596	348	596	418	668	724	463	564
ENSGALG00000031527	ARL8BL	1	22062046	22089723	1.2341	2.31e-08	1.34e-07	down	138	108	158	240	190	213	177	426	370	440	282	226	214	302
ENSGALG00000006445	ARNT2	10	12413427	12483133	1.29798	5.27e-11	4.68e-10	up	76	91	82	86	91	70	89	13	19	32	28	46	30	23
ENSGALG00000025915	ARRDC3	Z	59332839	59343581	1.58336	7.59e-15	1.25e-13	up	988	717	516	548	508	619	447	113	135	107	230	235	176	173
ENSGALG00000007012	ARRDC4	10	16471589	16478235	1.03575	5.96e-12	6.17e-11	up	353	347	399	387	454	253	462	88	166	140	148	203	126	172
ENSGALG00000011742	ART4	1	48069970	48074563	1.25526	0.0245791	0.04707	down	2	5	16	9	22	8	10	13	2	6	15	28	38	37
ENSGALG00000027166	ART7B	1	194201565	194202812	2.59182	0.0128984	0.0264118	up	0	5	2	4	2	4	6	0	1	0	1	0	1	0
ENSGALG00000028988	ART7C	1	194205316	194206557	2.43094	0.000124219	0.000384051	up	9	39	12	22	11	8	33	1	4	2	3	0	0	10
ENSGALG00000032098	ARTN	8	20406992	20407925	1.29214	0.000138393	0.000423976	down	15	11	16	15	33	10	9	49	35	25	23	19	35	24
ENSGALG00000043373	ARVCF	15	1064142	1189296	1.71724	3.76e-30	5.7e-28	up	603	463	470	694	801	641	798	146	153	104	191	171	162	157
ENSGALG00000008133	AS3MT	6	23394646	23398836	1.08892	3.11e-09	2.08e-08	down	258	298	274	394	324	352	367	714	631	679	372	418	512	458
ENSGALG00000016419	ASAP2	3	96512108	96596917	1.2113	2.75e-05	9.58e-05	up	668	627	360	367	609	563	706	85	168	77	299	398	155	202
ENSGALG00000004272	ASB1	7	5973865	5983496	1.15625	8.89e-12	8.97e-11	up	161	168	171	157	140	205	219	32	58	54	66	90	76	65
ENSGALG00000036446	ASB16	AADN04001028.1	17570	25004	1.07915	7.71e-06	2.96e-05	down	23	24	28	16	41	33	18	40	50	58	41	35	36	49
ENSGALG00000036725	ASCL3	5	9567674	9568216	1.05793	0.000257294	0.00074776	down	20	48	30	38	48	20	23	43	55	83	59	30	37	68
ENSGALG00000011250	ASIC4	7	22207312	22226474	1.78207	0.00206339	0.0050492	up	14	17	16	23	21	5	2	0	1	2	5	5	5	5
ENSGALG00000016531	ASXL2	3	105234656	105318244	1.30454	2.4e-14	3.6e-13	up	1295	1179	887	824	827	689	1077	201	284	232	386	433	369	301
ENSGALG00000009287	ATF2	7	16722225	16768556	1.24461	5.15e-22	2.53e-20	up	1011	891	752	748	768	750	806	172	281	216	283	394	290	314
ENSGALG00000032278	ATF6	8	3720750	3789997	1.21916	1.06e-13	1.43e-12	up	760	771	666	605	621	615	806	125	207	224	291	388	213	235
ENSGALG00000008347	ATG13	5	23485165	23498897	1.87142	2.13e-18	5.96e-17	up	997	985	649	603	725	718	1043	96	152	123	193	353	160	197
ENSGALG00000038330	ATG9B	AADN04009095.1	5123	9564	1.10021	2.81e-12	3.06e-11	down	113	122	132	103	169	133	181	247	270	216	235	218	257	180
ENSGALG00000014192	ATP10D	4	67190626	67220017	1.03541	5.66e-13	6.88e-12	up	451	401	294	365	383	277	446	151	135	165	163	153	98	149
ENSGALG00000041644	ATP11A	1	137769210	137885823	2.94282	5.47e-29	6.98e-27	up	517	504	312	285	431	413	538	24	27	28	51	104	46	38
ENSGALG00000006623	ATP11C	4	5119565	5166894	2.41631	1.76e-39	9.04e-37	up	2608	2380	1545	1548	1892	1771	2554	187	274	227	365	518	265	335
ENSGALG00000007075	ATP13A3	9	12873044	12920564	1.9117	4.48e-18	1.21e-16	up	2538	2910	1533	1021	1705	1829	2634	284	391	302	510	667	425	473
ENSGALG00000001564	ATP2A3	19	3247312	3281243	2.40844	2.17e-24	1.59e-22	up	3558	3268	2257	2318	2512	2342	4679	216	456	261	555	855	384	488
ENSGALG00000032875	ATP5F1D	28	3061180	3063379	1.10811	3.53e-09	2.34e-08	down	1398	2414	1572	1762	1548	3239	2699	3483	4210	3494	3015	3895	3858	3233
ENSGALG00000037017	ATP5MPL	5	50646303	50650785	1.01589	1.9e-27	2.12e-25	down	566	552	560	654	534	733	583	918	1046	963	840	968	981	1022
ENSGALG00000041091	ATP6	MT	9240	9923	1.18124	5.48e-12	5.71e-11	down	69410	88466	106741	108153	83289	75790	80713	173115	153973	222933	113180	129118	148512	153356
ENSGALG00000020754	ATP6V0E2	6	22093227	22094596	1.04233	1.16e-13	1.56e-12	down	103	92	134	169	158	127	111	190	240	199	206	212	230	189
ENSGALG00000007902	ATP7A	4	12963772	12981841	1.06165	7.1e-14	1e-12	up	695	620	481	478	514	439	554	122	194	217	220	255	186	262
ENSGALG00000032465	ATP8	MT	9085	9249	1.00083	4.18e-07	1.98e-06	down	1208	1190	1395	1251	1066	1443	1217	3102	1729	2208	1258	1493	1870	2104
ENSGALG00000014236	ATP8A1	4	68573329	68662442	1.0527	1.36e-06	5.93e-06	up	740	492	339	239	405	277	422	135	136	121	176	206	176	176
ENSGALG00000017106	ATP8A2	1	176737697	177046618	1.30811	1.36e-11	1.32e-10	up	517	425	658	466	702	552	715	148	187	87	183	278	187	251
ENSGALG00000016034	ATRN	4	89786495	89895044	1.88802	8.68e-47	1.5e-43	up	3715	3376	2447	3069	3300	2950	3782	532	780	533	723	1105	573	692
ENSGALG00000009152	ATRNL1	6	28169763	28585657	1.42732	5.07e-13	6.25e-12	up	188	142	177	302	249	268	272	40	80	52	96	72	53	84
ENSGALG00000007843	ATRX	4	12860852	12935606	1.54298	3.07e-34	8.47e-32	up	1574	1408	1108	1202	1218	1091	1420	258	361	281	328	546	365	354
ENSGALG00000012709	ATXN1	2	61772078	61780828	1.15402	7.44e-13	8.87e-12	up	281	240	194	190	243	160	299	85	91	68	90	105	75	62
ENSGALG00000028253	ATXN1L	11	19990903	19992975	1.42183	4.85e-18	1.3e-16	up	502	390	383	450	467	361	534	88	96	112	179	210	108	134
ENSGALG00000010766	ATXN3	5	44616495	44628129	1.10846	1.46e-18	4.22e-17	up	572	555	500	532	468	357	502	116	181	166	200	207	205	220
ENSGALG00000022815	AvBD1	3	107914855	107917298	2.93593	0.0247344	0.0473156	up	236	12	0	3	10	0	3	0	0	0	1	0	0	2
ENSGALG00000019847	AvBD12	3	107860150	107861091	2.25546	0.000219977	0.00064868	down	4	1	3	0	3	1	2	7	12	15	7	5	3	4
ENSGALG00000016669	AvBD2	3	107910925	107913428	2.91964	0.0155923	0.0312538	up	297	3	0	6	4	1	7	0	2	0	0	0	0	0
ENSGALG00000023622	AVD	Z	9164721	9165903	2.73596	2.36e-07	1.17e-06	up	3139	2883	2058	1509	1118	454	313	311	105	127	225	411	116	86
ENSGALG00000030319	AVPI1	6	22300953	22301240	1.65606	1.57e-14	2.44e-13	down	25	39	35	34	17	52	47	98	105	99	76	80	84	81
ENSGALG00000009497	AVPR2	1	28505731	28507926	1.82469	8.34e-06	3.18e-05	up	19	28	18	23	19	7	24	4	3	2	10	3	4	5
ENSGALG00000004367	AWAT1	4	1232638	1238405	1.14947	3.49e-07	1.68e-06	down	18	17	22	36	33	17	24	39	61	33	40	40	32	51
ENSGALG00000004173	AXDND1	8	6158567	6177748	2.05598	2.98e-05	0.000103196	down	1	2	3	2	4	6	1	8	11	12	7	5	9	11
ENSGALG00000003614	AZIN2	23	5344811	5350016	1.60756	9.43e-12	9.44e-11	down	88	113	146	220	124	81	175	407	343	437	269	221	240	338	ENSGALG00000002160	10	1254940	1257208
ENSGALG00000016128	B3GALT5	1	108079422	108081075	1.07432	0.00865755	0.0185039	up	185	144	36	60	87	115	102	24	44	10	29	117	31	32	ENSGALG00000013952	3	38173330	38196146
ENSGALG00000031590	B3GAT2	3	82815250	82837344	1.07445	1.69e-09	1.18e-08	down	47	57	39	60	46	45	53	73	102	90	111	59	72	73	ENSGALG00000010931	7	19285479	19286459
ENSGALG00000032526	B3GNT5	9	16350056	16354532	1.12567	9.17e-06	3.47e-05	up	860	679	533	397	473	534	483	99	196	104	310	377	205	192	ENSGALG00000002477	8	3440310	3446238
ENSGALG00000045617	BAALC	2	129934284	129955820	1.25941	0.000152307	0.000462698	down	27	23	30	36	41	29	25	71	66	113	48	37	39	20	ENSGALG00000016128	1	108079422	108081075
ENSGALG00000007298	BACE1	24	5238005	5244773	1.68692	1.03e-22	5.87e-21	up	529	512	504	515	533	514	674	94	103	85	150	248	125	146	ENSGALG00000001611	24	2590102	2619976
ENSGALG00000015828	BACH1	1	104102312	104115468	2.13666	4.85e-13	5.99e-12	up	1585	986	597	607	811	779	1242	90	124	77	241	366	135	196	ENSGALG00000015075	1	80638660	80648642
ENSGALG00000015605	BACH2	3	75635314	75677776	1.60071	3.56e-09	2.35e-08	up	215	170	100	137	149	95	165	27	15	46	60	62	25	37	ENSGALG00000031590	3	82815250	82837344
ENSGALG00000033675	BAHD1	5	808383	820342	1.98791	5.46e-27	5.52e-25	up	805	843	621	530	743	660	806	99	150	95	148	277	117	142	ENSGALG00000017076	1	174956251	174999081
ENSGALG00000012292	BANK1	4	60976048	61081696	1.95125	5.51e-08	3.01e-07	up	151	165	159	135	81	25	56	18	16	24	15	26	32	28	ENSGALG00000008930	3	9067300	9084370
ENSGALG00000003484	BARD1	7	4211635	4254770	1.11886	3.68e-15	6.3e-14	up	359	222	381	395	302	231	326	90	135	113	117	141	100	120	ENSGALG00000028803	15	5834814	5835917
ENSGALG00000035557	BARX1	12	6139852	6142332	1.19291	0.010501	0.021967	down	7	2	10	9	10	8	4	29	17	7	5	14	11	7	ENSGALG00000032526	9	16350056	16354532
ENSGALG00000033769	BBS10	1	38032888	38034822	1.16323	1.32e-09	9.3e-09	down	57	76	87	97	93	92	110	166	150	191	152	111	107	209	ENSGALG00000007701	9	15318557	15320500
ENSGALG00000015353	BBX	1	87305099	87349328	2.00432	3.54e-23	2.13e-21	up	310	234	187	208	183	171	247	16	48	52	49	52	53	37	ENSGALG00000021345	11	2493393	2494640
ENSGALG00000013177	BCAT1	1	65432216	65472333	2.50449	1.76e-29	2.51e-27	up	242	242	160	169	157	101	153	13	32	27	23	29	23	26	ENSGALG00000021553	17	8755217	8757173
ENSGALG00000034860	BCHE	9	21061419	21088025	1.07487	0.000120161	0.000372625	up	3714	4278	2202	2400	2359	3068	4634	551	979	551	1310	2648	1295	1486	ENSGALG00000001433	18	3160548	3269810
ENSGALG00000031862	BCL11B	5	47865611	47953976	1.45968	9.84e-12	9.81e-11	up	331	351	287	269	238	263	248	65	87	28	87	143	84	93	ENSGALG00000012988	1	60369118	60426095
ENSGALG00000012885	BCL2	2	68102902	68190463	1.14592	3.29e-38	1.29e-35	up	419	412	373	421	414	354	369	127	137	117	167	166	138	146	ENSGALG00000004250	5	1529587	1547463
ENSGALG00000011544	BCL2L14	1	71724526	71731735	1.39853	9.85e-09	6.09e-08	up	851	758	622	449	504	521	614	88	192	80	245	312	182	241	ENSGALG00000002022	Z	70633213	70650559
ENSGALG00000004379	BCL7A	15	5751928	5767726	1.32217	6.62e-13	7.96e-12	up	255	169	160	215	167	133	176	29	68	45	62	88	65	53	ENSGALG00000010094	8	20256330	20450472
ENSGALG00000007685	BCL9L	24	5578946	5589603	1.41199	9.6e-17	2.12e-15	up	876	983	656	618	766	731	918	146	222	203	305	390	189	234	ENSGALG00000015069	1	80596007	80621096
ENSGALG00000006695	BCR	15	8625525	8717899	1.26779	9.82e-29	1.23e-26	up	456	385	387	455	417	316	380	114	114	102	160	148	128	162	ENSGALG00000015151	2	106483864	106507860
ENSGALG00000011080	BDKRB2	5	46454378	46455523	1.03692	3.11e-06	1.27e-05	up	241	196	163	227	204	383	395	67	131	87	112	96	71	145	ENSGALG00000032145	13	10098027	10099984
ENSGALG00000010505	BEND5	8	23084517	23113939	1.01045	1.03e-14	1.66e-13	down	515	461	484	557	608	563	714	1037	1160	800	748	849	758	892	ENSGALG00000005096	14	5257917	5260122
ENSGALG00000041380	BF2	16	73915	76152	1.10266	0.000622003	0.00168517	up	15719	12338	13772	11958	14079	33673	42095	4686	12333	3320	10263	7092	5934	10595	ENSGALG00000045617	2	129934284	129955820
ENSGALG00000003111	BFAR	14	832254	836956	1.0638	1.55e-11	1.5e-10	up	1025	891	688	676	624	736	816	204	341	182	314	441	295	335	ENSGALG00000040619	AADN04000990.1	22400	24817
ENSGALG00000026396	BG1	16	128570	133685	1.28555	1.96e-10	1.58e-09	down	1130	1250	1011	1215	1346	902	782	1475	2683	2922	2344	1329	1455	2626	ENSGALG00000010039	3	27486112	27649822
ENSGALG00000036095	BICC1	6	762212	857639	1.18939	2.84e-21	1.24e-19	up	361	356	283	368	365	314	466	119	131	143	146	127	105	104	ENSGALG00000007298	24	5238005	5244773
ENSGALG00000032838	BKJ	AADN04003576.1	2156	4341	2.10092	0.00639742	0.0140832	down	1	3	1	0	1	1	0	5	2	2	4	3	3	5	ENSGALG00000034932	1	108844363	108894770
ENSGALG00000031092	BLEC3	16	238280	239931	2.25842	1.13e-08	6.89e-08	down	2	15	2	12	8	10	7	31	22	41	29	18	21	50	ENSGALG00000015828	1	104102312	104115468
ENSGALG00000016661	BLK	3	107708021	107727966	1.27812	2.14e-10	1.71e-09	up	380	322	415	441	367	164	262	112	97	128	95	96	97	143	ENSGALG00000015605	3	75635314	75677776
ENSGALG00000014537	BMF	5	29410988	29430989	1.78372	6.54e-16	1.27e-14	up	1830	1148	1059	1079	891	730	1228	139	267	164	386	415	232	270	ENSGALG00000013157	2	85906463	85915694
ENSGALG00000004742	BMP15	4	1874383	1876926	1.47538	0.0024808	0.00597427	down	9	3	7	4	10	6	18	29	6	18	17	40	8	8	ENSGALG00000009433	6	30302056	30319962
ENSGALG00000010885	BMP2K	4	45191555	45248570	1.46068	1.35e-18	3.93e-17	up	1678	1647	999	986	937	1019	1358	284	347	258	342	512	375	404	ENSGALG00000003254	22	2295195	2297365
ENSGALG00000016293	BMP5	3	87685181	87738505	1.1317	2.3e-18	6.39e-17	up	354	328	315	336	329	333	371	87	152	107	159	109	91	161	ENSGALG00000031062	5	50484678	50489630
ENSGALG00000012787	BMP6	2	64587752	64609767	1.19955	1.21e-15	2.24e-14	up	387	327	307	358	376	500	538	113	153	106	181	144	123	154	ENSGALG00000040308	18	9287316	9295387
ENSGALG00000007668	BMP7	20	11891443	11932585	1.30656	9.29e-19	2.8e-17	up	444	320	292	346	344	226	347	108	128	101	98	140	73	101	ENSGALG00000033675	5	808383	820342
ENSGALG00000002003	BMPR1A	6	2497710	2573153	1.18731	5.64e-08	3.08e-07	up	326	266	210	231	273	353	409	48	101	73	134	185	95	102	ENSGALG00000042538	18	9392580	9423796
ENSGALG00000008459	BMPR2	7	11874180	11969327	1.02884	1.32e-09	9.27e-09	up	1476	1338	1027	904	1125	1222	1604	288	533	349	502	761	532	485	ENSGALG00000003548	14	1148771	1183417
ENSGALG00000006662	BPIFB3	20	10489102	10497142	2.25689	5.55e-05	0.000182901	down	1	2	6	3	4	7	7	14	38	2	12	23	5	24	ENSGALG00000012285	1	51034057	51041742
ENSGALG00000012865	BRAF	1	56983387	57058584	1.15962	6.68e-10	4.91e-09	up	397	282	240	259	292	273	396	68	88	86	122	201	98	111	ENSGALG00000031493	26	4677808	4730058
ENSGALG00000002682	BRD3	17	7634707	7650589	1.75237	1.27e-30	2.06e-28	up	348	337	290	299	299	234	341	63	50	91	61	102	75	66	ENSGALG00000040993	2	15317843	15321683
ENSGALG00000002913	BRI3BP	15	4518239	4520623	1.81864	1.69e-30	2.7e-28	up	1570	1685	1177	1070	1224	1386	1420	184	326	209	350	446	310	366	ENSGALG00000031723	AADN04006967.1	7954	8947
ENSGALG00000009413	BROX	3	18004998	18013721	1.53901	2.29e-16	4.77e-15	up	487	449	345	307	374	365	520	66	80	108	119	193	94	132	ENSGALG00000012292	4	60976048	61081696
ENSGALG00000006681	BRSK2	5	14330182	14625903	1.62934	1.57e-08	9.39e-08	up	101	72	80	125	78	58	59	11	19	9	25	40	32	13	ENSGALG00000005872	11	18243649	18386576
ENSGALG00000014509	BST1	4	77208280	77222604	1.43276	9.93e-08	5.2e-07	up	601	506	273	219	359	262	335	41	116	78	127	196	102	113	ENSGALG00000004366	12	3100374	3112954
ENSGALG00000023359	BTBD17	18	9214742	9217838	1.3121	0.000108463	0.00033858	down	75	30	137	107	98	142	24	105	138	202	219	199	211	149	ENSGALG00000003484	7	4211635	4254770
ENSGALG00000028978	BTBD19	8	20861919	20867316	1.0497	3.22e-06	1.31e-05	down	28	43	35	35	55	55	59	77	112	64	82	79	48	52	ENSGALG00000043217	17	7059805	7064629
ENSGALG00000010131	BTBD9	3	29594124	29704099	1.58914	1.17e-10	9.79e-10	up	1033	1070	598	602	774	721	1037	94	224	124	240	448	219	239	ENSGALG00000040069	8	14758450	14761233
ENSGALG00000026858	BTG2	26	5123258	5124762	2.13163	6.36e-14	9.05e-13	up	1792	1464	991	1029	1298	1006	1469	175	149	92	199	600	218	260	ENSGALG00000035557	12	6139852	6142332
ENSGALG00000001716	C10H15ORF59	10	2199547	2206730	1.72777	4.21e-09	2.76e-08	down	12	15	6	22	15	20	31	39	49	71	42	36	44	34	ENSGALG00000029382	24	1345215	1371346
ENSGALG00000027353	C10orf71	6	18673770	18678338	1.22964	2.27e-05	8.03e-05	up	37	45	42	42	39	36	53	10	5	23	18	14	22	7	ENSGALG00000012952	2	75579535	75626939
ENSGALG00000045093	C12orf50	1	42783312	42794501	1.26536	2.92e-12	3.18e-11	up	115	82	80	93	84	78	95	24	30	15	29	45	38	28	ENSGALG00000010323	5	38322143	38331207
ENSGALG00000014555	C1H12ORF57	1	77325963	77327101	1.01572	2.92e-20	1.11e-18	down	553	551	703	757	651	688	767	1222	1075	967	940	1063	1099	1124	ENSGALG00000035516	3	21845131	21847685
ENSGALG00000045165	C1orf109	23	3665108	3666326	1.06416	1.07e-05	3.99e-05	down	27	50	36	51	43	35	21	65	68	75	60	36	74	56	ENSGALG00000010030	5	36011117	36040426
ENSGALG00000019570	C1orf145	2	63244367	63344758	1.50788	2.81e-11	2.58e-10	up	956	858	505	410	595	538	809	123	179	102	212	329	190	199	ENSGALG00000029408	19	212309	261603
ENSGALG00000026600	C1orf198	3	40659667	40679553	2.16305	2.5e-27	2.69e-25	up	399	403	441	419	369	422	477	38	48	53	110	131	71	79	ENSGALG00000029588	33	1634536	1648011
ENSGALG00000004771	C1QB	21	6083120	6085216	1.31047	1.18e-11	1.16e-10	up	436	624	446	404	791	338	493	183	185	145	145	131	141	205	ENSGALG00000012579	7	36743535	36851144
ENSGALG00000028031	C1QL1	27	1479940	1484015	1.76905	1.11e-05	4.14e-05	down	2	5	8	9	9	6	16	22	29	27	27	20	17	6	ENSGALG00000037714	6	26171029	26173945
ENSGALG00000027067	C1QTNF6	1	51475822	51477420	1.35459	1.13e-11	1.11e-10	up	63	77	61	82	87	83	83	15	16	34	32	23	23	24	ENSGALG00000045856	5	37767344	37774862
ENSGALG00000014515	C1QTNF7	4	77315528	77317102	1.41412	2.61e-15	4.57e-14	down	72	42	56	70	68	57	95	144	154	181	129	128	104	129	ENSGALG00000013297	5	3484747	3518031
ENSGALG00000044654	C22orf39	15	664843	665327	1.01599	1.05e-06	4.7e-06	down	64	90	106	126	97	138	118	135	152	243	169	151	108	233	ENSGALG00000033769	1	38032888	38034822
ENSGALG00000002881	C26H6ORF125	26	4615588	4620386	1.04785	1.37e-15	2.51e-14	down	222	254	196	250	173	225	160	366	398	326	289	351	374	330	ENSGALG00000042415	11	2188618	2203659
ENSGALG00000016148	C2CD2	1	109107584	109141826	1.12712	1.78e-20	6.98e-19	up	348	267	271	396	311	338	417	112	120	115	137	161	95	118	ENSGALG00000001798	10	1612983	1647497
ENSGALG00000017314	C2CD3	1	195778483	195812181	1.05112	9.02e-09	5.61e-08	up	140	122	97	91	103	108	166	27	48	32	56	58	43	57	ENSGALG00000009846	7	18767424	18778329
ENSGALG00000043690	C2orf40	1	135506245	135509378	1.22189	4.43e-08	2.46e-07	down	101	45	64	170	89	99	78	174	141	131	207	162	189	185	ENSGALG00000011880	4	54275609	54290011
ENSGALG00000043322	C2orf66	7	10030005	10033873	1.3148	9.89e-07	4.43e-06	down	32	65	50	59	50	32	27	87	133	129	79	53	70	69	ENSGALG00000015353	1	87305099	87349328
ENSGALG00000030038	C3	AADN04001210.1	6888	29576	2.55878	2.6e-16	5.34e-15	up	1090	1015	787	2053	992	379	471	107	147	174	74	98	182	118	ENSGALG00000045469	25	1478428	1486301
ENSGALG00000026293	C3orf33	9	23065441	23069345	1.24496	7.9e-17	1.78e-15	down	76	87	118	133	126	112	102	164	190	243	196	186	200	244	ENSGALG00000008009	1	14768856	14792300
ENSGALG00000041631	C3orf70	9	3520676	3538041	1.16632	1.79e-08	1.06e-07	up	132	117	149	139	131	107	110	32	20	64	49	57	36	57	ENSGALG00000042895	11	2033491	2038419
ENSGALG00000001565	C5	17	8801959	8828360	1.05434	0.000404233	0.00113437	down	34	96	88	44	27	31	37	65	90	109	84	62	82	101	ENSGALG00000007796	20	12593355	12627734
ENSGALG00000007941	C5H11orf74	5	19521772	19561907	1.02525	1.54e-07	7.88e-07	down	50	51	66	31	57	49	69	82	97	96	98	105	73	56	ENSGALG00000002002	26	3869908	3872919
ENSGALG00000042103	C5H11ORF96	5	21670426	21671409	1.50427	2.23e-09	1.53e-08	down	260	390	457	563	473	339	374	1042	625	1592	885	494	792	883	ENSGALG00000005295	19	7659287	7972906
ENSGALG00000006371	C5orf24	13	15766362	15766928	1.74756	5.64e-26	5e-24	up	400	400	332	414	412	386	484	55	93	73	117	171	74	99	ENSGALG00000013177	1	65432216	65472333
ENSGALG00000027512	C5orf30	Z	49956074	49965412	1.08698	1.39e-09	9.74e-09	up	197	259	162	164	198	263	269	62	120	64	93	91	56	88	ENSGALG00000006617	6	32571769	32577739
ENSGALG00000045522	C6orf58	3	59239901	59251787	1.27149	0.00955437	0.0202083	up	19	7	14	7	6	15	21	2	5	3	4	12	2	2	ENSGALG00000043400	33	1411893	1416397
ENSGALG00000040264	C9H2ORF82	9	1045745	1052220	1.46345	0.000593857	0.00161588	down	6	3	4	6	4	7	7	11	4	17	12	8	19	9	ENSGALG00000034860	9	21061419	21088025
ENSGALG00000003456	CA12	10	4027277	4045255	1.53121	0.020471	0.0399386	up	8	3	6	22	3	6	13	0	3	3	2	7	0	2	ENSGALG00000040702	3	79329300	79439703
ENSGALG00000005855	CA5B	11	18224587	18236644	1.66453	2.42e-21	1.08e-19	up	98	100	89	104	106	91	121	23	22	14	40	32	21	27	ENSGALG00000028935	8	16349746	16357586
ENSGALG00000033720	CA7	11	11454156	11462000	1.63467	3.49e-06	1.42e-05	up	913	1822	1105	853	546	346	607	84	146	133	323	474	233	245	ENSGALG00000034048	3	1854198	1913151
ENSGALG00000027262	CAB39	9	5419310	5452363	1.00161	1.5e-09	1.05e-08	up	2103	1696	1461	1539	1540	1733	2348	455	767	426	775	1121	713	765	ENSGALG00000031862	5	47865611	47953976
ENSGALG00000014998	CABLES1	2	103216424	103248307	1.04582	2.64e-08	1.52e-07	up	214	253	243	223	283	223	359	86	71	66	116	175	80	109	ENSGALG00000012885	2	68102902	68190463
ENSGALG00000037497	CABP2	5	380959	383539	1.61039	1.17e-09	8.29e-09	down	72	57	66	91	72	50	85	219	154	295	124	85	153	136	ENSGALG00000006511	10	12637320	12639335
ENSGALG00000034132	CACFD1	17	7402296	7408519	2.18984	5.75e-21	2.43e-19	up	201	214	154	141	205	167	265	22	36	15	32	70	31	34	ENSGALG00000006211	20	10217327	10234317
ENSGALG00000008486	CACNA2D1	1	10220631	10584619	1.03194	4.54e-10	3.44e-09	down	1018	1027	1222	1718	1635	1525	1779	2767	2367	2701	2062	1954	1874	2263	ENSGALG00000030871	10	8889124	8891224
ENSGALG00000035466	CACNB4	AADN04000639.1	104169	125545	1.0329	8.35e-07	3.78e-06	down	51	47	56	50	55	38	54	111	81	50	121	73	63	71	ENSGALG00000013037	1	61870544	61907992
ENSGALG00000027771	CACNG1	18	7298229	7304614	1.37372	6.05e-10	4.48e-09	down	146	143	198	199	179	200	251	544	402	563	250	327	285	300	ENSGALG00000011544	1	71724526	71731735
ENSGALG00000036925	CADM3	25	2491925	2496892	1.51802	2.31e-27	2.52e-25	up	1911	1843	2070	2724	2327	1743	2084	536	452	747	537	779	463	570	ENSGALG00000007357	9	14830574	14846807
ENSGALG00000008273	CALHM3	6	23650152	23653222	1.11731	0.00251237	0.00604556	down	4	7	6	9	7	10	5	11	12	6	14	7	17	16	ENSGALG00000004379	15	5751928	5767726
ENSGALG00000029912	CAMK1	12	11500177	11502890	1.03214	5.09e-13	6.27e-12	down	139	128	138	206	198	189	217	301	294	299	298	248	258	268	ENSGALG00000036647	19	161387	164441
ENSGALG00000033051	CAMK1D	1	6522549	6602832	1.28146	2.98e-11	2.74e-10	up	142	90	99	112	98	81	104	41	42	40	21	40	30	23	ENSGALG00000037655	1	92375565	92389300
ENSGALG00000006411	CAMLG	13	15798306	15801409	1.20757	3.91e-15	6.67e-14	up	366	339	399	357	437	396	485	97	175	105	159	212	93	133	ENSGALG00000007685	24	5578946	5589603
ENSGALG00000039525	CAMTA1	21	309659	433746	1.56521	4.29e-16	8.52e-15	up	154	133	116	166	134	156	235	34	28	46	55	59	29	44	ENSGALG00000013935	3	55388152	55408404
ENSGALG00000036294	CAP1	23	5563597	5574294	1.56868	2.63e-18	7.24e-17	up	5494	4648	3924	4421	3709	3688	4428	609	1114	814	1319	2096	1135	1218	ENSGALG00000016418	1	119952518	119973810
ENSGALG00000040478	CAPN5	1	193324498	193358592	1.60815	2.53e-09	1.72e-08	up	764	503	321	369	453	552	964	88	122	73	237	214	121	186	ENSGALG00000005408	11	15677760	15691537
ENSGALG00000008006	CAPN6	4	13384418	13431218	3.14568	2.29e-17	5.59e-16	up	105	94	34	59	49	58	60	5	4	12	8	6	5	1	ENSGALG00000007868	24	6110301	6130965
ENSGALG00000009382	CAPN8	3	17716651	17731004	1.52365	2.46e-05	8.65e-05	up	161	106	42	86	141	173	242	14	54	14	56	59	27	46	ENSGALG00000003976	4	1600734	1625497
ENSGALG00000038527	CARMIL3	KQ759530.1	14681	29334	1.67194	4e-11	3.6e-10	down	54	70	90	98	121	92	71	183	198	422	177	182	156	181	ENSGALG00000006695	15	8625525	8717899
ENSGALG00000038241	CARTPT	Z	73143821	73144683	1.63897	6.81e-05	0.000220475	down	1	5	9	6	7	8	11	25	14	7	23	10	16	21	ENSGALG00000011386	7	22592086	22597668
ENSGALG00000036950	CASP14	AADN04000662.1	80344	83137	1.71521	1.73e-06	7.39e-06	down	17	12	5	5	8	20	30	26	31	21	36	60	39	44	ENSGALG00000016668	3	107900662	107906657
ENSGALG00000008933	CASP7	6	27520205	27538328	1.06579	0.000166139	0.000501097	up	1915	1481	1091	739	1130	1103	1409	271	502	143	637	895	482	541	ENSGALG00000006947	9	12665620	12679204
ENSGALG00000015611	CASP8AP2	3	75700849	75718891	1.38371	1.8e-18	5.13e-17	up	646	644	484	441	457	453	497	105	146	123	167	254	137	192	ENSGALG00000012338	4	61363428	61376731
ENSGALG00000027490	CATHB1	2	4022675	4023803	1.92116	3.87e-06	1.55e-05	down	9	50	41	18	9	13	23	78	116	38	48	63	116	34	ENSGALG00000020386	5	46461641	46462717
ENSGALG00000045119	CATIP	7	22679698	22681613	1.75518	0.00109911	0.00283659	down	0	1	4	3	5	1	3	8	6	4	6	10	5	7	ENSGALG00000011080	5	46454378	46455523
ENSGALG00000029077	CBL	24	4225268	4255878	2.17904	1.59e-26	1.53e-24	up	1036	946	655	656	680	477	713	68	119	100	148	228	129	132	ENSGALG00000012163	5	3715527	3747234
ENSGALG00000015351	CBLB	1	86647126	86769237	1.41303	6.02e-12	6.23e-11	up	692	593	398	403	403	357	564	83	137	92	199	229	130	167	ENSGALG00000005266	11	11619893	11657333
ENSGALG00000036867	CBX6	1	50804456	50812317	1.64263	1.08e-18	3.21e-17	up	393	372	407	379	315	241	454	76	59	125	91	126	103	71	ENSGALG00000002973	27	5478574	5483356
ENSGALG00000041236	CBX7	1	50786846	50795719	1.79324	2.31e-23	1.45e-21	up	328	300	250	214	268	187	311	41	59	44	72	104	52	61	ENSGALG00000011236	5	48744092	48888728
ENSGALG00000014514	CC2D2A	4	77261661	77306093	1.04899	1.02e-07	5.34e-07	down	502	325	306	631	563	387	734	977	621	890	836	754	619	902	ENSGALG00000015314	3	68143484	68151654
ENSGALG00000027785	CCBE1	Z	9303649	9323534	2.16069	3.42e-15	5.92e-14	up	41	75	60	40	60	78	50	8	9	10	11	15	6	14	ENSGALG00000010505	8	23084517	23113939
ENSGALG00000005784	CCDC117	15	7752481	7757835	1.03336	1.59e-15	2.87e-14	up	205	221	183	212	243	183	199	76	74	55	85	106	67	104	ENSGALG00000016283	3	87150129	87156007
ENSGALG00000042463	CCDC142	KQ759550.1	13072	16897	1.5091	1.04e-10	8.84e-10	down	38	60	89	72	103	61	66	191	146	217	174	115	121	134	ENSGALG00000006682	1	6790345	6838577
ENSGALG00000014391	CCDC149	4	74104406	74153401	1.52215	1.19e-18	3.51e-17	up	178	147	145	138	149	162	214	24	53	35	48	65	55	37	ENSGALG00000007217	5	16823643	16830832
ENSGALG00000044002	CCDC153	24	4258271	4261105	1.37335	3.64e-12	3.89e-11	down	43	90	89	61	81	79	71	158	169	185	120	115	167	143	ENSGALG00000010029	1	35534379	35550868
ENSGALG00000007907	CCDC157	15	10875974	10885281	1.08088	0.000118586	0.000368048	down	8	18	25	23	37	32	34	22	48	45	54	47	32	54	ENSGALG00000043605	8	20844355	20848115
ENSGALG00000008956	CCDC186	6	27706900	27723967	1.17435	9.78e-07	4.39e-06	up	954	718	374	410	570	575	817	135	227	113	284	367	234	227	ENSGALG00000024485	2	23421226	23431596
ENSGALG00000020813	CCDC50	9	13705897	13741849	2.179	7.18e-18	1.89e-16	up	2510	1922	1609	1709	1722	1503	1888	137	268	153	490	636	300	339	ENSGALG00000004172	5	1599696	1604031
ENSGALG00000046262	CCDC60	15	9719205	9743172	1.09643	0.000872777	0.00230224	down	26	32	35	87	31	56	112	108	114	128	70	55	65	91	ENSGALG00000033932	16	87661	89904
ENSGALG00000006714	CCDC61	9	3427461	3430996	1.12516	8.55e-13	1.01e-11	down	330	389	433	605	416	396	499	890	792	930	608	683	718	642	ENSGALG00000041380	16	73915	76152
ENSGALG00000007689	CCDC84	24	5630121	5633751	1.36433	9.52e-20	3.36e-18	down	100	153	136	167	144	143	133	260	313	354	298	216	282	268	ENSGALG00000003111	14	832254	836956
ENSGALG00000043080	CCDC85A	3	387087	449320	1.07451	2.29e-09	1.57e-08	up	188	201	255	258	233	199	221	71	82	127	67	116	50	77	ENSGALG00000008735	3	11489065	11507709
ENSGALG00000039837	CCKBR	1	194457115	194459494	1.68672	1.99e-06	8.39e-06	down	14	3	10	11	14	10	19	49	13	34	30	29	21	28	ENSGALG00000034585	2	42762444	42777858
ENSGALG00000028256	CCL19	Z	8363765	8366761	1.50342	0.00254111	0.00610996	up	2015	2362	1594	1819	690	320	371	242	422	254	90	520	541	539	ENSGALG00000026396	16	128570	133685
ENSGALG00000024470	CCLI5	19	4763267	4764359	1.0712	0.00202702	0.00496677	down	17	18	26	24	50	12	38	47	53	70	15	50	31	42	ENSGALG00000029494	25	594	1789
ENSGALG00000006479	CCM2L	20	10302775	10305878	1.28228	3.83e-08	2.14e-07	down	28	28	36	45	42	45	51	83	97	101	75	43	52	77	ENSGALG00000040249	2	114781680	114783733
ENSGALG00000017052	CCNA1	1	172568581	172574262	1.83419	0.00115657	0.00297409	down	6	1	5	9	20	4	18	26	68	4	20	26	26	10	ENSGALG00000005718	20	8677346	8681420
ENSGALG00000017283	CCND2	1	73241231	73282113	1.50865	2.51e-29	3.41e-27	up	594	393	387	479	402	396	493	78	145	107	137	169	134	116	ENSGALG00000008308	12	18624949	18629296
ENSGALG00000038502	CCNF	14	14290195	14299794	1.08252	1.24e-10	1.04e-09	up	436	386	395	439	271	217	275	91	139	138	148	157	122	118	ENSGALG00000041414	1	67641436	67643827
ENSGALG00000010347	CCNG2	4	35277597	35281300	1.25226	9.25e-10	6.65e-09	up	1434	754	838	929	697	823	1072	194	366	153	431	425	317	332	ENSGALG00000036095	6	762212	857639
ENSGALG00000009699	CCNL1	9	22871187	22883043	1.0505	9.25e-15	1.51e-13	down	1459	1904	2103	2268	1929	1583	1743	3074	3240	3926	2693	2727	2672	2972	ENSGALG00000012934	1	59164015	59224210
ENSGALG00000028595	CCNO	Z	16730624	16731687	1.22401	0.0258152	0.0491272	down	2	4	4	3	15	12	7	13	4	6	21	30	4	12	ENSGALG00000005249	12	6826774	6901196
ENSGALG00000007076	CCNY	2	12867236	12980731	1.13306	3.24e-09	2.17e-08	up	249	186	256	282	157	197	216	65	55	106	74	130	63	69	ENSGALG00000007319	15	9549185	9589736
ENSGALG00000011733	CCR2	2	42849468	42850532	2.75428	3.43e-24	2.46e-22	up	182	151	99	113	102	61	114	10	23	15	16	11	13	9	ENSGALG00000009911	3	23119921	23148269
ENSGALG00000039146	CCR4	2	44567230	44568383	1.71066	3.65e-06	1.47e-05	up	64	64	74	70	32	21	27	4	7	11	10	22	14	19	ENSGALG00000013039	1	61913394	61932331
ENSGALG00000037077	CCR5	2	42832406	42838099	2.39541	6.12e-15	1.02e-13	up	166	86	135	120	97	45	55	13	13	11	11	17	18	24	ENSGALG00000014164	1	68563259	68575275
ENSGALG00000011418	CCR6	3	42599910	42601090	2.7553	1.06e-20	4.3e-19	up	154	173	189	196	112	96	81	5	35	14	16	19	14	17	ENSGALG00000011541	7	23809924	23893673
ENSGALG00000035733	CCR7	27	4891171	4899901	1.84119	7.9e-05	0.000253366	up	2117	1751	1750	1934	755	365	538	113	286	338	80	415	468	360	ENSGALG00000037929	33	1556563	1565854
ENSGALG00000038069	CCR8	2	44531020	44534335	2.08619	5.29e-07	2.47e-06	up	73	71	57	50	48	18	17	5	11	11	6	18	2	11	ENSGALG00000017186	1	182634266	182644438
ENSGALG00000011734	CCR8L	2	42869123	42870256	1.832	0.00374527	0.00869574	up	52	23	34	46	7	1	14	2	6	7	1	3	12	8	ENSGALG00000008713	3	15427651	15428804
ENSGALG00000011808	CCR9	2	42945010	42946158	2.58392	4.19e-08	2.33e-07	up	26	49	24	25	17	13	12	5	3	3	2	1	3	5	ENSGALG00000010541	3	31572475	31748573
ENSGALG00000011084	CCSAP	3	40119670	40122732	1.19349	1.85e-05	6.62e-05	up	40	20	24	37	33	23	30	11	4	10	10	14	10	13	ENSGALG00000005762	20	8912703	8919316
ENSGALG00000037682	CCSER2	6	966398	1018487	1.1331	6.12e-09	3.91e-08	up	175	245	124	144	152	154	244	41	57	60	66	101	53	77	ENSGALG00000016861	1	142772651	142789290
ENSGALG00000015910	CD109	3	81650139	81729852	1.30295	2.77e-07	1.36e-06	up	138	67	92	143	126	175	212	30	42	52	62	60	35	27	ENSGALG00000032838	AADN04003576.1	2156	4341
ENSGALG00000039140	CD14	13	954498	955895	3.44562	4.76e-20	1.75e-18	up	51	45	32	45	66	28	60	3	4	3	2	6	2	4	ENSGALG00000000141	16	116646	118450
ENSGALG00000023411	CD180	Z	21298861	21305055	2.01038	2.59e-10	2.04e-09	up	85	61	52	62	76	27	40	10	12	16	5	8	18	10	ENSGALG00000030940	16	109677	111212
ENSGALG00000043052	CD1B	16	18036	20776	1.1922	2.36e-06	9.86e-06	up	447	343	394	394	391	210	209	85	138	192	114	87	60	156	ENSGALG00000027126	20	5232373	5234006
ENSGALG00000030270	CD1C	16	14372	17201	1.19976	7.72e-05	0.000247903	up	131	90	112	188	72	53	58	13	38	39	23	40	40	52	ENSGALG00000028659	16	118833	121187
ENSGALG00000019231	CD200R1	1	83437067	83457590	1.09518	1.79e-06	7.63e-06	up	97	146	110	136	117	105	167	34	37	25	71	33	56	72	ENSGALG00000000136	16	122774	125266
ENSGALG00000013748	CD226	2	94012286	94030148	2.06265	3.85e-06	1.54e-05	up	41	45	35	42	15	11	31	0	10	8	6	2	7	9	ENSGALG00000031092	16	238280	239931
ENSGALG00000008669	CD28	7	13495614	13507829	3.35587	2.28e-14	3.44e-13	up	207	188	175	193	76	51	55	4	6	18	2	21	13	10	ENSGALG00000016661	3	107708021	107727966
ENSGALG00000014508	CD38	4	77172736	77193248	1.29147	1.01e-05	3.8e-05	up	1154	954	1416	2169	767	456	573	205	420	452	246	307	314	486	ENSGALG00000008256	10	19933508	19950517
ENSGALG00000007416	CD3E	24	5450666	5455569	1.43981	1.05e-05	3.94e-05	up	3617	3891	3496	4293	2143	1404	1308	233	761	1088	522	1154	1157	1055	ENSGALG00000004259	19	6224236	6239656
ENSGALG00000014477	CD4	1	77208503	77219967	1.36672	0.000682025	0.00183276	up	574	672	754	679	297	208	201	76	115	149	27	231	255	203	ENSGALG00000006973	6	21081986	21124235
ENSGALG00000035856	CD48	25	1283095	1284656	1.2441	3.18e-06	1.3e-05	up	1734	1618	1783	1945	1148	554	776	258	409	461	327	555	680	533	ENSGALG00000005794	6	17562682	17567599
ENSGALG00000005194	CD72	Z	9056706	9060302	2.83139	1.84e-06	7.79e-06	up	329	170	240	545	132	44	89	14	17	24	2	65	20	34	ENSGALG00000012782	2	64526717	64540232
ENSGALG00000002383	CD72AG	Z	9066089	9069222	1.34621	0.00316539	0.00745886	up	112	109	95	132	36	28	28	21	22	39	2	26	33	24	ENSGALG00000040735	10	10695134	10700906
ENSGALG00000004594	CD74	13	13146841	13150694	1.50647	1.44e-10	1.19e-09	up	59256	55404	53308	58711	47208	21239	36193	6740	13592	8127	12649	17272	16574	19283	ENSGALG00000031786	2	51764995	51794492
ENSGALG00000000251	CD79B	27	1793526	1797961	1.65788	0.000628144	0.00170057	up	779	521	801	1330	397	173	225	80	100	202	38	291	147	216	ENSGALG00000015225	1	83677123	83683799
ENSGALG00000015474	CD80	1	92260427	92282945	1.18289	1.12e-08	6.85e-08	up	723	749	566	533	446	452	516	120	208	111	222	354	234	176	ENSGALG00000014537	5	29410988	29430989
ENSGALG00000046032	CD83	2	60893104	60904213	2.18744	1.5e-11	1.45e-10	up	296	261	225	277	148	108	154	12	25	49	25	76	21	54	ENSGALG00000041267	2	17748562	17758699
ENSGALG00000014362	CD86	1	76641354	76652029	2.1271	5.77e-08	3.15e-07	up	65	43	33	58	38	15	24	6	1	7	12	9	9	6	ENSGALG00000000120	22	284593	290447
ENSGALG00000015900	CD8A	4	86325634	86375374	2.08552	0.00484073	0.0109468	down	0	2	0	2	1	2	1	2	4	4	5	1	5	6	ENSGALG00000004742	4	1874383	1876926
ENSGALG00000015902	CD8B	4	86469040	86474132	1.05642	0.00959157	0.0202777	up	158	141	169	189	108	28	83	14	65	54	12	56	81	55	ENSGALG00000029301	3	15110369	15113622
ENSGALG00000008359	CD93	3	3328455	3330821	1.28929	1.67e-21	7.58e-20	up	659	620	587	660	701	646	697	139	211	224	240	290	245	148	ENSGALG00000010885	4	45191555	45248570
ENSGALG00000026095	CDC26	17	1971559	1972040	1.4638	1.06e-19	3.72e-18	down	111	112	126	151	148	146	100	319	342	284	274	195	257	283	ENSGALG00000035052	4	45776069	45790398
ENSGALG00000040447	CDCP1	2	43219475	43240492	1.31607	4.17e-12	4.43e-11	up	1060	858	592	697	702	783	1107	173	227	154	329	410	273	315	ENSGALG00000012429	5	58698105	58700937
ENSGALG00000010752	CDCP2	8	25223275	25226916	1.81599	2.43e-34	6.92e-32	down	122	174	155	153	159	146	141	547	413	427	412	347	346	434	ENSGALG00000016293	3	87685181	87738505
ENSGALG00000036097	CDH18	2	74510089	74695043	1.11634	0.01915	0.037595	up	22	3	11	14	17	41	48	4	11	6	7	13	9	8	ENSGALG00000012787	2	64587752	64609767
ENSGALG00000005102	CDH4	20	7546069	7840288	1.36258	5.35e-08	2.93e-07	up	46	61	102	87	89	52	92	25	15	27	19	28	32	17	ENSGALG00000007668	20	11891443	11932585
ENSGALG00000009062	CDK14	2	21877225	22125099	2.08031	1.79e-20	7.01e-19	up	191	157	173	236	111	149	148	8	34	38	32	42	34	33	ENSGALG00000029811	2	47688331	47834840
ENSGALG00000011456	CDK17	1	45800053	45837648	1.09901	1.08e-13	1.46e-12	up	534	476	387	397	456	334	433	104	166	122	206	234	134	171	ENSGALG00000002003	6	2497710	2573153
ENSGALG00000015051	CDK19	3	66536015	66649661	2.5206	2.82e-22	1.47e-20	up	540	514	328	331	377	347	587	23	47	54	71	133	41	61	ENSGALG00000012216	4	58732964	58968719
ENSGALG00000034919	CDK2AP1	15	5081945	5097271	1.06699	2.17e-08	1.27e-07	down	564	400	550	778	635	621	720	1214	1196	1405	834	786	712	874	ENSGALG00000008459	7	11874180	11969327
ENSGALG00000039190	CDK2AP2	5	383892	384770	1.28311	5.29e-15	8.91e-14	down	195	285	295	369	399	301	239	492	565	749	584	561	460	628	ENSGALG00000002624	6	5071454	5092701
ENSGALG00000034095	CDK5	KQ759368.1	8521	11406	1.26256	8.6e-17	1.92e-15	down	362	374	430	551	472	388	448	959	847	1001	823	606	675	803	ENSGALG00000009440	1	26768477	26802391
ENSGALG00000002358	CDO1	Z	72942623	72952484	1.52608	1.13e-05	4.18e-05	down	71	33	134	177	194	69	269	393	363	389	276	290	211	210	ENSGALG00000016557	1	121963490	121989828
ENSGALG00000011227	CDS1	4	47124908	47149837	1.206	6.69e-07	3.07e-06	up	1054	1041	631	497	794	706	927	183	259	115	370	497	270	303	ENSGALG00000006041	10	11295144	11301592
ENSGALG00000030406	CDS2	22	322628	341454	1.4749	5.63e-26	5e-24	up	624	519	455	468	524	485	584	96	172	102	156	232	144	162	ENSGALG00000015101	Z	32351223	32692277
ENSGALG00000012978	CDYL2	11	15487397	15539333	1.52449	7.24e-09	4.57e-08	up	238	176	98	119	96	118	151	21	48	19	55	63	41	33	ENSGALG00000002882	13	9179299	9184374
ENSGALG00000040180	CEBPD	2	108248344	108249313	1.13878	7.98e-08	4.24e-07	down	137	130	145	239	255	167	135	252	245	321	219	248	421	400	ENSGALG00000003788	10	5315236	5324861
ENSGALG00000004568	CELA2A	21	5542455	5547227	1.66009	6.28e-05	0.000204861	down	2	3	4	7	7	4	6	7	17	20	8	12	10	9	ENSGALG00000010476	6	34844510	34850063
ENSGALG00000008097	CELF1	5	22804759	22852407	1.22123	7.39e-10	5.41e-09	up	546	564	423	366	507	432	632	88	182	115	200	307	141	180	ENSGALG00000043405	22	531919	545332
ENSGALG00000034590	CELF2	1	5528711	5974445	1.19126	8.43e-16	1.61e-14	up	412	275	324	401	308	251	370	103	172	115	86	126	94	122	ENSGALG00000015152	1	83273631	83292347
ENSGALG00000032320	CEND1	5	407815	416465	1.45049	2.31e-05	8.17e-05	up	20	15	23	28	33	30	37	11	4	12	8	10	2	7	ENSGALG00000026470	4	77944595	77980409
ENSGALG00000010733	CEP170	3	35335865	35422784	1.11717	2.64e-19	8.6e-18	up	383	327	338	476	398	406	406	124	114	185	152	152	127	147	ENSGALG00000005772	9	5088178	5101479
ENSGALG00000006405	CEP19	9	4675125	4677900	1.34646	8.18e-07	3.71e-06	down	31	20	41	34	23	26	28	68	44	103	60	50	43	37	ENSGALG00000036160	7	10311922	10329111
ENSGALG00000014892	CEP85L	3	63018384	63155719	1.3999	9.84e-15	1.59e-13	up	218	203	176	185	160	123	159	58	68	64	53	55	31	40	ENSGALG00000016931	1	156259760	156279285
ENSGALG00000003160	CERS1	28	3746346	3756801	2.94122	1.51e-40	9.04e-38	up	244	231	212	225	195	111	153	14	14	20	20	32	22	21	ENSGALG00000040393	1	71899126	71960632
ENSGALG00000014624	CERS3	10	17297468	17341030	1.2114	8.9e-06	3.38e-05	down	29	46	18	34	46	29	34	56	86	99	59	49	49	34	ENSGALG00000028145	3	76105664	76106296
ENSGALG00000010902	CERS6	7	19039829	19149307	2.12773	0.000665504	0.00179305	up	14	2	5	14	6	12	13	1	1	1	5	2	1	1	ENSGALG00000008124	6	23391088	23394145
ENSGALG00000012100	CFAP221	7	28481649	28499392	1.47006	0.00237723	0.00574052	down	6	4	8	1	4	4	0	9	9	5	12	7	10	8	ENSGALG00000014581	28	3587092	3594853
ENSGALG00000043885	CFAP45	25	2533722	2536950	1.65933	1.99e-05	7.11e-05	down	5	15	21	14	26	24	29	41	76	78	16	43	22	63	ENSGALG00000013069	1	62239536	62258379
ENSGALG00000009902	CFAP57	8	19691444	19711677	1.24688	0.000972231	0.00253817	down	7	5	20	5	12	4	13	15	19	16	21	28	18	9	ENSGALG00000029659	2	66518737	66541167
ENSGALG00000046316	CFAP97D1	27	3483420	3486566	1.04924	0.000546454	0.00149936	down	74	55	63	95	58	60	47	49	88	238	57	119	84	105	ENSGALG00000006666	20	10498385	10503032
ENSGALG00000042020	CG-16	4	50050413	50052876	1.00294	0.00189957	0.00467802	down	14	13	7	17	25	9	12	31	14	25	14	18	23	28	ENSGALG00000006662	20	10489102	10497142
ENSGALG00000027874	CHAC1	5	24438649	24440766	1.2318	5.55e-09	3.57e-08	down	204	108	119	222	252	145	217	269	361	372	374	304	447	218	ENSGALG00000006679	20	10519797	10524406
ENSGALG00000011970	CHADL	1	49788795	49792401	1.53748	2.73e-07	1.34e-06	down	46	73	71	67	61	57	72	94	70	90	77	211	259	243	ENSGALG00000006674	20	10504870	10508991
ENSGALG00000028810	CHCHD10	15	8014553	8015183	1.48942	3.77e-17	8.87e-16	down	210	253	358	401	364	348	276	810	668	912	601	585	619	704	ENSGALG00000009576	3	18827463	18843109
ENSGALG00000002180	CHFR	15	1523742	1535728	1.42603	2.62e-12	2.88e-11	up	297	202	168	161	186	153	207	29	69	55	47	98	47	69	ENSGALG00000038222	18	7073216	7117413
ENSGALG00000046616	CHGB	3	16844159	16908817	1.11863	1.53e-13	2.01e-12	down	157	130	152	204	106	154	205	333	256	220	280	322	221	277	ENSGALG00000012865	1	56983387	57058584
ENSGALG00000023760	CHIA	26	5088652	5102917	1.3302	0.00095049	0.00248632	up	23	18	8	22	18	10	24	1	5	7	5	4	5	12	ENSGALG00000004650	15	6237578	6272982
ENSGALG00000036407	CHIR-B2	AADN04002470.1	10473	13423	2.15312	0.000823063	0.0021823	up	62	13	102	45	34	14	24	2	7	1	0	26	13	6	ENSGALG00000002781	27	5573536	5593894
ENSGALG00000032887	CHIR-B3	AADN04001138.1	12852	14668	2.3607	0.000154122	0.000467981	up	30	35	28	72	23	6	3	3	9	4	2	9	0	4	ENSGALG00000017073	1	174560560	174597292
ENSGALG00000034411	CHIR-B4	AADN04006143.1	4321	6234	1.85719	0.0068939	0.0150472	up	9	11	5	11	9	1	5	4	2	3	1	1	0	0	ENSGALG00000005383	4	2200027	2204262
ENSGALG00000043573	CHMP4C	2	122037633	122051680	1.30607	5.68e-07	2.64e-06	up	2604	2980	2040	1623	2350	2465	2953	376	764	298	947	1585	771	919	ENSGALG00000029379	1	18747413	18806394
ENSGALG00000035461	CHORDC1	1	187635761	187648339	1.31086	1.25e-19	4.32e-18	up	620	540	431	651	727	388	576	156	165	147	173	260	189	178	ENSGALG00000000156	16	102514	113361
ENSGALG00000010778	CHRM1	3	36525270	36778774	1.57221	2.08e-13	2.69e-12	up	72	56	58	79	61	70	56	5	21	18	24	23	16	15	ENSGALG00000002682	17	7634707	7650589
ENSGALG00000009640	CHRM5	5	30084838	30086424	2.7891	0.00959535	0.020282	down	2	1	0	0	0	3	1	8	3	0	1	15	12	0	ENSGALG00000003786	11	6630401	6644729
ENSGALG00000022702	CHRNA10	1	194820512	194824114	1.48592	0.0256643	0.0488702	up	22	18	13	9	8	9	2	0	10	2	0	8	2	2	ENSGALG00000037646	13	10065289	10080015
ENSGALG00000014268	CHRNA9	4	69390132	69394616	2.03547	0.00364587	0.0084809	up	25	9	22	9	4	5	3	0	2	1	1	1	7	3	ENSGALG00000006031	8	14345658	14361185
ENSGALG00000029632	CHST13	12	10472792	10492466	1.2095	2.06e-08	1.21e-07	up	101	87	82	120	88	54	73	26	33	44	28	37	18	22	ENSGALG00000011705	5	52749257	52908313
ENSGALG00000009704	CHST15	6	31900240	31917647	1.06394	2.49e-22	1.32e-20	up	801	811	715	972	696	674	764	219	272	312	377	301	296	292	ENSGALG00000003124	22	2238252	2241286
ENSGALG00000031375	CHST7	1	130364434	130365888	1.92988	0.000666806	0.00179525	up	19	15	12	6	6	6	8	3	2	5	2	2	0	1	ENSGALG00000041914	14	1137304	1147361
ENSGALG00000004903	CHST8	11	10629242	10799049	1.25305	8.38e-07	3.79e-06	down	32	27	48	26	26	37	36	59	91	95	56	50	51	37	ENSGALG00000002913	15	4518239	4520623
ENSGALG00000026899	CHSY3	Z	45139013	45283428	1.03727	0.000965214	0.00252199	up	30	24	15	37	29	44	33	7	10	7	23	14	7	15	ENSGALG00000006997	17	4502517	4580960
ENSGALG00000010390	CIPC	5	39112817	39120080	1.13146	2.75e-13	3.52e-12	up	189	135	134	118	154	146	185	44	72	38	59	55	56	64	ENSGALG00000004448	8	6734402	6739573
ENSGALG00000002260	CISH	12	1870818	1875257	1.71531	1.87e-17	4.65e-16	up	1628	1599	843	1153	1437	1273	1744	233	333	178	374	577	371	319	ENSGALG00000033407	8	8277167	8464972
ENSGALG00000008325	CKAP5	5	23399012	23435075	1.03669	1.15e-32	2.36e-30	up	2136	1645	1597	1923	1518	1547	1903	504	716	664	726	828	626	721	ENSGALG00000005279	19	7494633	7541587
ENSGALG00000011455	CL2	4	49948789	49949830	1.15656	7.5e-05	0.000241443	down	15	57	18	33	27	19	24	30	50	32	60	52	70	51	ENSGALG00000003373	Z	10563582	10567349
ENSGALG00000025804	CLCN2	9	15969989	15979634	1.49718	4.4e-21	1.89e-19	down	407	709	640	535	706	529	493	896	1195	1618	1417	1318	1128	1527	ENSGALG00000038941	12	2736852	2737239
ENSGALG00000009674	CLCN3	4	25540500	25584149	2.52087	5.97e-20	2.19e-18	up	1233	1112	653	515	746	776	1354	48	121	100	146	271	109	115	ENSGALG00000010093	5	36396570	36415543
ENSGALG00000026862	CLDN1	9	13990203	14000682	1.19985	1.73e-07	8.79e-07	up	459	341	263	238	171	219	171	73	71	89	133	87	88	106	ENSGALG00000009413	3	18004998	18013721
ENSGALG00000009038	CLDN12	2	21763074	21763811	1.25566	5.54e-10	4.13e-09	up	116	94	74	66	117	96	125	18	33	28	42	41	27	43	ENSGALG00000033529	12	11486636	11497797
ENSGALG00000001621	CLDN5	15	701150	702907	1.87477	7.18e-32	1.38e-29	up	374	365	349	386	491	413	526	60	84	121	114	91	66	96	ENSGALG00000006406	4	4348873	4354712
ENSGALG00000016707	CLIC5	3	110100695	110163451	1.70514	4.67e-08	2.58e-07	up	866	903	332	264	486	422	1001	70	144	126	217	263	94	152	ENSGALG00000006681	5	14330182	14625903
ENSGALG00000016020	CLIC6	1	105984248	105989738	1.8163	3.31e-07	1.6e-06	up	31	58	63	40	68	36	65	10	11	6	9	34	5	9	ENSGALG00000016065	1	107943223	107993948
ENSGALG00000030450	CLIP2	19	2751696	2795240	2.03142	2.4e-44	2.78e-41	up	469	356	343	441	435	403	453	59	106	55	104	102	52	93	ENSGALG00000007151	4	9450043	9499029
ENSGALG00000028438	CLK1	7	11350773	11354753	1.38185	6.46e-14	9.17e-13	down	588	553	587	738	623	513	461	1273	969	1791	945	857	1244	1226	ENSGALG00000003405	23	5206054	5215312
ENSGALG00000030719	CLMN	5	45979330	45995515	1.84569	1.61e-08	9.65e-08	up	1651	1504	850	957	1022	1139	2078	159	219	67	386	643	309	312	ENSGALG00000001328	28	2698084	2709095
ENSGALG00000006507	CLMP	24	3030958	3068375	1.01712	1.56e-15	2.83e-14	up	655	647	618	674	585	918	778	206	324	285	309	331	209	271	ENSGALG00000001849	12	2472587	2517710
ENSGALG00000016917	CLN5	1	154459230	154467752	1.38515	1.93e-18	5.45e-17	up	328	285	276	414	351	268	346	71	64	92	124	151	94	99	ENSGALG00000043998	8	25354681	25355970
ENSGALG00000013793	CLOCK	4	65497092	65522295	1.15718	2.12e-07	1.06e-06	up	892	947	501	497	697	697	960	155	230	169	373	457	266	238	ENSGALG00000008861	17	1948741	1954284
ENSGALG00000010384	CLRN1	9	23697558	23701239	1.07582	1.74e-05	6.28e-05	down	10	10	20	22	19	17	20	22	23	39	24	33	29	28	ENSGALG00000014509	4	77208280	77222604
ENSGALG00000037387	CLSTN2	9	6212445	6381940	2.30977	3.32e-16	6.73e-15	up	49	46	82	61	99	76	61	12	8	7	6	17	10	17	ENSGALG00000006515	24	3098292	3100225
ENSGALG00000005139	CLTC	19	7287318	7316659	1.00093	1.71e-12	1.93e-11	up	9027	8104	6621	6948	6823	7574	8424	2170	2983	1894	3552	4587	3061	3377	ENSGALG00000030598	6	20942394	20984116
ENSGALG00000014853	CLVS2	3	61257934	61307258	2.22894	0.00899942	0.0191527	up	13	0	7	3	6	4	14	0	3	0	2	0	2	1	ENSGALG00000006020	10	11192901	11206182
ENSGALG00000028982	CMPK2	3	95396266	95400963	1.65356	0.00131017	0.00332975	up	2562	763	874	371	368	237	642	224	245	61	244	434	122	172	ENSGALG00000005369	5	7534735	7560040
ENSGALG00000005251	CMTM4	11	11546671	11573359	1.41142	7.62e-05	0.000244955	up	113	90	59	38	79	89	140	27	19	6	22	64	25	23	ENSGALG00000039595	1	53427816	53497435
ENSGALG00000011490	CMTM6	2	40582217	40590962	2.29461	2.02e-16	4.24e-15	up	475	363	221	215	161	192	359	33	41	20	44	86	56	47	ENSGALG00000023359	18	9214742	9217838
ENSGALG00000011488	CMTM7	2	40542630	40570356	1.29099	6.33e-10	4.68e-09	up	865	795	822	1055	569	403	410	187	233	260	173	238	260	245	ENSGALG00000028978	8	20861919	20867316
ENSGALG00000010149	CMTR1	3	30244395	30267117	1.16145	4.11e-07	1.95e-06	up	2289	1177	1042	912	846	724	1124	333	400	308	450	678	291	469	ENSGALG00000001019	28	2143380	2155407
ENSGALG00000002356	CMTR2	11	1571363	1573654	1.76323	7.51e-14	1.05e-12	up	332	416	197	173	196	215	371	52	80	34	85	77	53	70	ENSGALG00000009028	3	13082203	13088766
ENSGALG00000007282	CNGA2	4	10960845	10962293	1.16124	0.000248714	0.000724988	down	22	29	19	58	32	42	53	87	42	60	36	67	38	121	ENSGALG00000033813	5	52829868	52832920
ENSGALG00000046299	CNKSR1	23	234420	240335	1.02277	8.11e-12	8.22e-11	down	755	697	758	688	801	870	798	1306	1247	1766	1141	1136	902	1141	ENSGALG00000005977	8	14285091	14295767
ENSGALG00000041266	CNN1	AADN04001212.1	17158	19578	1.74759	2.09e-14	3.19e-13	down	8274	5054	9058	13192	11501	11713	13329	34954	30841	37761	25557	22729	17725	20274	ENSGALG00000010131	3	29594124	29704099
ENSGALG00000008160	CNNM2	6	23400232	23499498	1.47301	2.12e-18	5.95e-17	up	377	354	250	269	304	298	354	72	97	53	103	150	91	75	ENSGALG00000028608	4	34879240	34884609
ENSGALG00000034316	CNOT6	13	13852683	13864572	1.69108	4.13e-37	1.56e-34	up	1669	1467	1301	1329	1232	1110	1703	243	325	277	388	532	322	360	ENSGALG00000011216	2	34089580	34100249
ENSGALG00000010333	CNOT6L	4	35229458	35239169	1.52717	1.22e-17	3.11e-16	up	676	665	515	593	567	459	708	80	133	151	188	261	199	156	ENSGALG00000013512	Z	24736670	24743237
ENSGALG00000028471	CNPY3	3	16039436	16041757	1.13635	3.48e-13	4.38e-12	down	679	659	866	842	782	858	744	1676	1692	1478	974	1099	1285	1233	ENSGALG00000010570	8	24338651	24348899
ENSGALG00000004120	CNR2	23	5619783	5620838	1.85299	0.0124749	0.0256144	up	4	5	5	11	4	3	4	0	1	2	0	4	1	0	ENSGALG00000011276	1	44398383	44401046
ENSGALG00000043285	CNTD1	27	5473787	5477716	1.11834	1.4e-14	2.2e-13	down	86	81	90	115	82	82	86	175	165	184	125	155	135	130	ENSGALG00000026858	26	5123258	5124762
ENSGALG00000026207	CNTF	5	16919059	16920630	1.04979	3.4e-13	4.28e-12	down	114	113	120	147	173	89	173	215	238	207	248	214	206	199	ENSGALG00000007618	24	5533745	5535809
ENSGALG00000008263	CNTN4	12	17898685	18121966	1.03659	1.94e-13	2.52e-12	up	149	132	161	126	169	158	179	43	57	68	66	73	60	52	ENSGALG00000004958	4	2042911	2053843
ENSGALG00000011577	CNTNAP5	7	24545119	24814619	1.89527	2.12e-12	2.35e-11	up	58	38	32	43	52	50	54	10	15	8	15	4	7	11	ENSGALG00000000589	28	790661	796192
ENSGALG00000034345	COA3	27	5473594	5474209	1.16841	3.04e-15	5.3e-14	down	61	90	102	98	76	81	115	179	182	140	147	148	163	153	ENSGALG00000007820	6	22831879	22943782
ENSGALG00000040910	COA7	8	24582578	24584656	1.05474	1.63e-14	2.53e-13	down	392	344	375	454	452	630	500	812	796	657	667	871	743	665	ENSGALG00000008233	3	3107192	3126953
ENSGALG00000028866	COASY	27	5386659	5389962	1.04377	1.61e-11	1.55e-10	down	310	455	455	561	416	447	377	822	711	846	631	570	657	678	ENSGALG00000036892	5	558497	582785
ENSGALG00000032456	COII	MT	8331	9014	1.03098	3.45e-10	2.67e-09	down	120156	148317	180010	183456	141982	150018	135492	267181	269963	338167	178084	204298	206448	246894	ENSGALG00000009681	6	31536692	31548248
ENSGALG00000029617	COL17A1	6	24133416	24173373	1.54874	8.16e-06	3.12e-05	up	302	347	172	159	280	153	190	14	64	31	41	144	84	74	ENSGALG00000025882	24	5093021	5098988
ENSGALG00000038311	COL18A1	7	6633230	6662722	1.04359	1.17e-09	8.31e-09	up	1700	973	1061	1248	1616	1654	1863	501	462	681	682	666	450	459	ENSGALG00000037510	19	85884	90660
ENSGALG00000043223	COL26A1	19	3498587	3653964	1.65932	1.21e-06	5.31e-06	up	37	21	25	40	42	15	25	6	6	7	8	11	2	12	ENSGALG00000004705	14	4399144	4401534
ENSGALG00000010259	COL28A1	2	24735576	24796883	1.06672	4.39e-05	0.000147611	down	426	187	293	350	553	327	477	656	755	1034	369	660	405	436	ENSGALG00000015410	3	69051906	69078558
ENSGALG00000030712	COL2A1	AADN04000776.1	11	7373	1.12629	6.62e-06	2.57e-05	down	127	47	83	89	100	77	107	168	90	221	162	145	193	96	ENSGALG00000003467	26	5026787	5029465
ENSGALG00000014952	COL4A3BP	Z	23905366	23975796	1.45545	6.61e-13	7.95e-12	up	847	686	447	409	484	572	503	109	147	121	175	301	154	162	ENSGALG00000027546	16	216607	218965
ENSGALG00000008141	COL4A5	4	13955889	14009116	1.37045	1.02e-07	5.32e-07	up	2403	2088	1026	1208	2113	2165	3788	548	668	972	726	427	545	618	ENSGALG00000008220	7	11337369	11347900
ENSGALG00000008266	COL4A6	4	14111920	14151756	1.60378	1.93e-08	1.14e-07	up	1390	999	579	733	1272	1276	2365	326	297	487	400	179	234	295	ENSGALG00000010809	2	28540481	28592547
ENSGALG00000005628	COL9A3	20	8532484	8564351	1.30203	4.17e-12	4.43e-11	down	92	86	107	123	96	90	84	278	213	186	165	140	135	201	ENSGALG00000001716	10	2199547	2206730
ENSGALG00000014910	COLEC12	2	102313605	102405919	1.04777	9.11e-07	4.1e-06	up	624	512	521	546	593	794	916	284	283	280	350	171	134	222	ENSGALG00000027353	6	18673770	18678338
ENSGALG00000008931	COMMD1	3	8983259	9052594	1.2216	4.58e-23	2.71e-21	down	233	298	267	313	281	301	250	620	531	399	546	496	520	488	ENSGALG00000000011	6	31441001	31444539
ENSGALG00000001572	COMMD4	10	2568308	2570032	1.04449	2.73e-17	6.57e-16	down	233	333	302	346	304	357	310	555	606	529	507	462	431	494	ENSGALG00000003183	11	2452598	2486132
ENSGALG00000016922	COMMD6	1	155063078	155069210	1.35771	6.17e-08	3.35e-07	up	577	518	527	356	465	493	588	102	268	51	197	235	114	158	ENSGALG00000017363	11	7889806	7903422
ENSGALG00000043336	COPZ1	33	1170371	1176837	1.03429	4.35e-20	1.61e-18	down	526	531	580	698	575	639	623	1115	1141	945	913	848	897	910	ENSGALG00000004480	11	8519434	8526002
ENSGALG00000001933	CORO2A	Z	70482714	70527115	1.53572	1.1e-05	4.11e-05	up	2332	1935	928	533	930	1767	1744	182	526	152	663	752	293	320	ENSGALG00000007950	24	6217278	6218903
ENSGALG00000008043	CORO2B	10	19231702	19258499	1.07792	1.31e-07	6.75e-07	down	208	128	210	282	276	299	268	479	356	553	388	396	297	309	ENSGALG00000044914	5	9571335	9574683
ENSGALG00000028949	CORO6	19	6079158	6083665	1.32148	1.55e-08	9.3e-08	down	179	132	185	251	255	264	311	575	561	612	344	440	256	317	ENSGALG00000008255	5	23204929	23293797
ENSGALG00000033441	COX14	33	293423	293953	1.46166	1.23e-27	1.43e-25	down	82	82	88	97	107	102	81	203	223	219	182	163	200	208	ENSGALG00000032467	24	6200315	6206582
ENSGALG00000033446	COX5B	AADN04001130.1	21902	22402	1.0043	2.66e-07	1.31e-06	down	955	2684	1944	1778	1929	2059	2118	2415	3059	3894	3260	2931	2209	3878	ENSGALG00000017155	1	179921189	179921656
ENSGALG00000007205	COX6A1	15	9341601	9342871	1.12511	1.12e-20	4.53e-19	down	3042	3101	3249	3894	3474	4131	3987	7520	6891	5531	5378	5662	5908	6092	ENSGALG00000044645	5	6790711	6791781
ENSGALG00000004295	CPD	19	6246344	6269003	1.60935	5.37e-13	6.57e-12	up	3922	3386	2272	2126	2404	2938	3683	449	709	392	902	1415	848	816	ENSGALG00000037688	AADN04000776.1	47638	50396
ENSGALG00000002150	CPEB1	10	1264586	1290224	1.00532	1.29e-05	4.77e-05	down	79	32	50	64	60	52	44	81	104	135	76	80	71	57	ENSGALG00000011168	1	42795854	42802617
ENSGALG00000006912	CPEB3	6	20843233	20919088	1.7501	6.41e-08	3.47e-07	up	255	173	166	157	171	127	181	11	34	23	48	117	32	37	ENSGALG00000017289	1	73124893	73151338
ENSGALG00000033512	CPEB4	13	9433355	9465773	1.18112	7.75e-11	6.69e-10	up	388	332	244	301	365	327	385	59	88	122	131	195	115	123	ENSGALG00000006965	15	9145291	9148312
ENSGALG00000015332	CPLX1	Z	52264712	52364226	1.79277	5.96e-08	3.24e-07	up	103	83	125	115	179	130	192	8	21	12	57	43	27	50	ENSGALG00000045093	1	42783312	42794501
ENSGALG00000007090	CPN1	6	22028326	22034788	1.14094	9.36e-08	4.93e-07	down	181	139	176	288	256	408	348	472	446	518	386	500	430	387	ENSGALG00000027682	1	33594888	33606303
ENSGALG00000035561	CPNE3	2	123675047	123692295	1.968	1.05e-12	1.22e-11	up	396	419	196	229	259	290	451	28	55	41	87	141	50	66	ENSGALG00000026311	1	54229629	54246246
ENSGALG00000030676	CPNE5	26	1183181	1189514	2.07522	0.000184788	0.000552572	down	3	0	3	2	3	4	5	13	10	14	16	3	5	5	ENSGALG00000006506	13	16135901	16141737
ENSGALG00000009693	CPXM2	6	31798032	31862477	1.45865	7.92e-05	0.000253939	up	150	20	131	260	126	182	266	45	61	38	64	51	22	47	ENSGALG00000030649	1	169989919	169993797
ENSGALG00000030209	CPZ	4	81756780	81791318	1.26646	8.21e-06	3.13e-05	up	117	59	45	93	136	184	118	25	39	27	52	33	31	44	ENSGALG00000006456	14	7521315	7561630
ENSGALG00000008274	CRBN	12	18148923	18160315	1.29767	2.94e-17	7.01e-16	up	405	292	254	262	254	258	344	54	117	79	116	113	96	101	ENSGALG00000038596	5	46372741	46373355
ENSGALG00000008494	CREB1	7	12239757	12275487	1.19457	8.36e-23	4.79e-21	up	683	691	644	745	609	513	653	176	235	171	238	346	178	254	ENSGALG00000036504	5	54521949	54545310
ENSGALG00000008393	CREB3L1	5	23698675	23739368	1.61958	4.46e-19	1.41e-17	up	365	277	248	272	317	413	487	65	92	119	95	101	74	71	ENSGALG00000031821	15	11504654	11510195
ENSGALG00000012877	CREB3L2	1	57408100	57480365	1.677	1.29e-14	2.03e-13	up	709	611	331	323	428	424	707	81	136	81	124	203	125	144	ENSGALG00000029390	15	5097210	5099714
ENSGALG00000001252	CREB3L3	28	2632685	2637600	1.28632	1.21e-08	7.39e-08	down	709	1023	754	476	1093	599	692	610	1746	1364	1503	1739	1457	2195	ENSGALG00000046532	10	10666581	10670187
ENSGALG00000002878	CREBRF	13	9155352	9173391	1.23415	8.31e-11	7.14e-10	up	371	209	262	267	303	231	324	50	85	94	125	158	80	82	ENSGALG00000028141	10	18959625	18962085
ENSGALG00000040947	CREG2	1	133559659	133574827	1.21226	9.6e-07	4.31e-06	up	59	36	36	40	56	34	52	12	9	16	19	18	10	24	ENSGALG00000040929	5	970577	971107
ENSGALG00000037148	CRH	2	115416217	115417210	2.18378	3.81e-16	7.67e-15	down	11	10	18	16	20	22	26	55	58	106	68	55	48	52	ENSGALG00000007291	14	9913060	9923922
ENSGALG00000026471	CRIP2	8	4011576	4021435	1.19108	3.7e-10	2.85e-09	down	679	600	724	1076	1047	1039	1153	1866	2067	1894	1746	1314	1042	1471	ENSGALG00000004783	17	5637888	5641166
ENSGALG00000032143	CRISPLD2	11	17142610	17163354	1.69389	2.77e-22	1.45e-20	up	666	410	507	647	942	554	743	108	141	153	202	167	138	196	ENSGALG00000003590	18	7060623	7067829
ENSGALG00000002656	CRK	19	5149078	5161738	1.5018	8.33e-08	4.42e-07	up	343	175	154	155	248	251	295	43	70	31	74	143	66	39	ENSGALG00000003434	18	6801943	6805493
ENSGALG00000006390	CRKL	15	8309591	8321686	1.11078	1.28e-36	4.56e-34	up	439	371	351	394	369	358	420	105	144	136	147	180	143	146	ENSGALG00000024428	18	6330246	6335894
ENSGALG00000026146	CRLF1	28	3894656	3898468	1.17985	1.91e-05	6.83e-05	down	41	45	43	63	37	60	49	62	74	190	64	79	61	73	ENSGALG00000013131	2	83841416	83847040
ENSGALG00000007945	CRYAB	24	6212347	6216461	1.41702	9.11e-07	4.1e-06	down	63	25	49	117	99	76	109	227	168	175	188	109	101	154	ENSGALG00000042000	Z	1081841	1085343
ENSGALG00000004035	CRYBA1	19	5961995	5965823	1.95666	3.15e-09	2.11e-08	down	3	14	12	10	5	7	8	28	26	35	21	33	13	27	ENSGALG00000044510	2	92226911	92240484
ENSGALG00000030101	CSDC2	1	49627010	49631391	1.3657	1.74e-05	6.27e-05	down	13	11	15	14	11	18	13	39	41	21	41	14	17	21	ENSGALG00000029614	28	3108656	3111773
ENSGALG00000005725	CSF1R	13	13275947	13293798	1.4759	3.86e-18	1.04e-16	up	2833	2372	1842	2645	2683	1169	2090	603	655	721	560	542	650	711	ENSGALG00000026847	28	1332157	1335751
ENSGALG00000002112	CSF3R	23	4028838	4033940	1.58807	1.67e-12	1.89e-11	up	679	1051	559	685	808	425	533	117	166	283	154	146	208	175	ENSGALG00000008765	3	11233265	11246857
ENSGALG00000031578	CSMD3	2	133691901	134258240	1.62765	0.000122271	0.000378405	down	2	2	4	6	8	5	4	12	17	10	11	5	11	10	ENSGALG00000009752	2	24717102	24730949
ENSGALG00000032184	CSPG5	2	841145	846278	1.20365	2.48e-05	8.71e-05	down	18	17	21	24	35	30	21	66	41	50	44	42	40	18	ENSGALG00000008513	4	16447427	16449128
ENSGALG00000027905	CSRNP1	2	5277138	5282741	1.2974	1.02e-08	6.3e-08	up	364	281	251	318	307	199	296	47	56	97	67	171	119	103	ENSGALG00000017219	1	185861462	185870861
ENSGALG00000000318	CSRP1	26	512935	772333	1.66313	1.05e-14	1.69e-13	down	12037	9923	14833	20583	19413	19523	20576	55408	46658	56407	35335	35699	28217	32870	ENSGALG00000017189	1	182765820	182785257
ENSGALG00000008660	CST7	3	15825416	15830701	1.18451	0.000619115	0.00167833	up	262	285	330	477	220	86	152	29	127	115	40	117	92	121	ENSGALG00000014555	1	77325963	77327101
ENSGALG00000033351	CTHRC1	2	130013430	130018289	1.25774	0.00360018	0.00838631	down	7	3	1	14	7	10	16	19	16	22	18	12	14	7	ENSGALG00000030933	1	54754183	54755465
ENSGALG00000035912	CTIF	Z	1281398	1371968	1.22826	4.76e-07	2.24e-06	up	259	405	204	218	255	294	283	53	59	80	108	202	86	79	ENSGALG00000019171	1	110334367	110341333
ENSGALG00000008666	CTLA4	7	13461800	13465952	1.99767	3.56e-05	0.000121461	up	261	193	275	343	78	37	42	14	25	58	11	35	53	47	ENSGALG00000037962	1	104998580	105005906
ENSGALG00000017239	CTSC	1	188310798	188327047	1.01462	5.46e-08	2.99e-07	up	3731	2579	3035	3500	2166	1625	1748	671	1248	1052	1049	1018	949	1294	ENSGALG00000028290	1	99381867	99398599
ENSGALG00000006613	CTSD	5	14123783	14134951	2.39344	5.55e-14	7.94e-13	up	3663	2924	2312	2320	2757	2474	3567	119	361	153	562	1018	405	531	ENSGALG00000016796	1	135215430	135252869
ENSGALG00000038266	CTXN2	10	10075674	10075919	2.5002	0.000254102	0.000739298	down	2	1	1	6	0	1	0	8	6	8	9	4	2	12	ENSGALG00000045165	23	3665108	3666326
ENSGALG00000008559	CUL4B	4	16458726	16479086	1.18	4.51e-16	8.93e-15	up	1325	1073	956	948	873	795	1148	244	285	359	339	542	351	404	ENSGALG00000032743	8	5086919	5096604
ENSGALG00000026663	CX3CL1	11	831860	836141	1.54455	1.75e-13	2.3e-12	up	647	502	464	398	386	322	467	67	134	69	151	206	103	159	ENSGALG00000034303	3	18652638	18656187
ENSGALG00000006346	CXCL14	13	15407661	15414929	1.29796	1.01e-18	3.03e-17	up	776	841	635	797	663	495	738	129	218	198	267	276	229	299	ENSGALG00000001091	26	2605227	2608015
ENSGALG00000007675	CXCR5	24	5567223	5572244	4.30329	1.24e-08	7.53e-08	up	373	268	369	640	125	57	118	0	11	16	0	28	14	11	ENSGALG00000026516	8	24720213	24727655
ENSGALG00000016286	CXorf21	1	115794507	115795376	2.06977	5.3e-05	0.000175124	up	62	33	59	104	23	10	15	2	10	11	2	9	10	14	ENSGALG00000019570	2	63244367	63344758
ENSGALG00000016261	CYBB	1	113150989	113183645	2.60453	7.67e-13	9.12e-12	up	639	542	482	757	382	159	307	52	39	87	11	68	82	84	ENSGALG00000004102	21	5253737	5257097
ENSGALG00000001607	CYBC1	18	3536063	3544410	1.26592	1.96e-16	4.13e-15	up	697	549	629	640	437	406	668	116	215	146	206	274	178	214	ENSGALG00000027363	21	2642929	2655720
ENSGALG00000003818	CYFIP2	13	11367959	11407960	2.39858	2.33e-29	3.2e-27	up	764	685	635	588	434	277	395	72	63	77	74	88	82	116	ENSGALG00000000975	21	898339	900470
ENSGALG00000001892	CYGB	18	4382661	4389729	1.65363	3.98e-39	1.89e-36	up	262	251	170	262	259	249	268	46	66	58	71	70	63	63	ENSGALG00000026600	3	40659667	40679553
ENSGALG00000039742	CYP21A1	16	52234	56078	1.29602	3.41e-07	1.64e-06	down	65	81	85	142	58	62	102	265	121	167	107	139	196	139	ENSGALG00000020922	8	7861351	7942970
ENSGALG00000042279	CYP24A1	20	12557653	12565016	1.2591	0.00556057	0.0124062	up	35	31	63	69	11	13	22	3	10	8	10	28	12	12	ENSGALG00000002353	23	4262381	4263094
ENSGALG00000033695	CYP26A1	6	20555766	20558838	1.17796	0.000109989	0.000343094	down	10	15	8	22	17	10	10	21	27	36	28	22	13	18	ENSGALG00000004800	21	6382557	6386714
ENSGALG00000027908	CYP2U1	4	38240517	38250340	1.69706	7.64e-09	4.8e-08	up	322	366	190	236	311	344	448	35	60	32	99	179	85	70	ENSGALG00000001378	26	3165104	3165577
ENSGALG00000029435	CYP7B1	2	114794326	114922700	3.10426	7.77e-39	3.59e-36	up	119	90	95	90	96	78	88	9	9	8	14	12	4	5	ENSGALG00000021569	21	6088915	6090874
ENSGALG00000015015	CYTL1	4	79471991	79474709	1.49457	0.015474	0.0310554	down	5	6	2	3	5	15	10	20	48	4	8	7	2	16	ENSGALG00000004771	21	6083120	6085216
ENSGALG00000037015	DACH1	1	156676089	157041790	1.43326	1.23e-11	1.21e-10	up	68	41	53	64	71	66	72	9	19	18	18	19	18	28	ENSGALG00000001654	19	3403634	3406149
ENSGALG00000000528	DBNDD1	11	19093979	19155591	1.22333	4.91e-13	6.06e-12	down	80	99	89	117	137	115	112	243	224	221	204	163	169	158	ENSGALG00000029669	21	6086545	6088226
ENSGALG00000003921	DBNDD2	20	5248043	5254471	1.3266	2.54e-11	2.35e-10	down	801	706	945	1111	1138	1269	1258	2115	2417	3139	1904	1638	1453	1632	ENSGALG00000028031	27	1479940	1484015
ENSGALG00000041263	DCLK1	1	172697278	172928907	1.09681	0.000155422	0.000471619	up	48	23	32	64	44	64	59	14	23	18	31	14	13	11	ENSGALG00000040992	7	28589901	28590859
ENSGALG00000034493	DCLK3	2	46064049	46088568	1.84543	9.21e-10	6.63e-09	up	247	241	146	167	132	64	134	18	19	52	34	45	49	33	ENSGALG00000032554	2	20148462	20152635
ENSGALG00000000215	DCP2	Z	45955426	45980081	2.80469	1.99e-15	3.55e-14	up	231	191	132	95	80	96	114	7	13	4	23	36	14	13	ENSGALG00000043798	AADN04000737.1	52017	54212
ENSGALG00000033520	DCSTAMP	2	130555339	130558082	1.1866	0.0115404	0.0239088	up	60	52	36	14	65	20	41	12	13	38	2	9	15	10	ENSGALG00000001857	21	2472220	2486139
ENSGALG00000016899	DCT	1	146485483	146506238	2.13925	0.0117586	0.0243173	down	2	1	1	2	0	0	0	2	3	1	4	3	6	2	ENSGALG00000027232	13	7837678	7845187
ENSGALG00000007993	DCX	4	13283140	13356242	1.40253	0.00483969	0.0109468	up	21	7	7	13	6	9	16	2	6	2	2	8	3	1	ENSGALG00000008080	5	22762420	22779740
ENSGALG00000008663	DDAH1	8	16296875	16342908	2.16529	2.01e-15	3.58e-14	up	206	136	119	201	222	163	238	19	21	22	69	51	26	22	ENSGALG00000006758	24	4193220	4195607
ENSGALG00000013094	DDC	2	81012156	81057410	2.44469	3.51e-09	2.32e-08	up	79	105	52	54	51	116	111	1	7	4	22	29	10	13	ENSGALG00000027067	1	51475822	51477420
ENSGALG00000041459	DDIT4	6	11459153	11459905	1.19006	2.19e-06	9.22e-06	down	458	355	455	662	477	287	203	849	667	1118	473	537	721	810	ENSGALG00000014515	4	77315528	77317102
ENSGALG00000010884	DDX24	5	45498859	45511104	1.02883	2.52e-18	6.96e-17	up	501	554	526	514	395	453	468	135	218	148	172	258	202	213	ENSGALG00000005253	14	5617810	5620433
ENSGALG00000014713	DDX4	Z	16929446	16961054	2.42585	1.88e-05	6.73e-05	up	36	37	29	28	7	9	9	0	1	6	3	5	6	2	ENSGALG00000014659	1	77392527	77399415
ENSGALG00000033064	DDX6	24	5551128	5564568	1.37727	6.41e-21	2.68e-19	up	1810	1728	1528	1579	1439	1286	1498	271	458	379	509	762	504	501	ENSGALG00000014603	1	77379603	77388708
ENSGALG00000011213	DEGS2	5	48559896	48574158	1.10897	0.00150212	0.00378021	up	761	576	410	325	478	611	906	77	191	51	268	489	220	260	ENSGALG00000035721	23	1796430	1803097
ENSGALG00000002246	DENND1B	8	2339757	2479306	1.42832	8.38e-11	7.19e-10	up	341	346	229	253	206	127	204	38	93	65	84	94	73	63	ENSGALG00000001054	20	497110	501466
ENSGALG00000011306	DES	7	22291852	22295615	1.32803	1.64e-11	1.57e-10	down	19806	15395	20984	34401	32577	31422	34062	69203	55549	58131	53911	54719	37490	44483	ENSGALG00000045441	AADN04002702.1	3274	5296
ENSGALG00000035113	DEXI	14	9108633	9115863	1.0198	3.57e-09	2.36e-08	down	26	44	38	48	30	44	55	67	68	54	57	72	65	78	ENSGALG00000027484	20	11480791	11484789
ENSGALG00000005891	DGCR2	15	7922579	7957158	1.12841	1.11e-08	6.8e-08	up	1216	1061	803	942	942	951	1309	185	349	226	471	640	382	431	ENSGALG00000040059	1	105102339	105103016
ENSGALG00000001730	DGKD	9	1203848	1257261	1.12011	1.05e-10	8.89e-10	up	1260	1050	893	964	1075	615	880	196	376	261	376	538	379	380	ENSGALG00000013881	22	3557025	3563645
ENSGALG00000003131	DGKE	18	6337106	6344590	1.54898	1.38e-21	6.32e-20	up	233	201	183	146	182	164	185	29	51	39	54	76	47	61	ENSGALG00000012293	1	51105368	51109027
ENSGALG00000002142	DGKQ	Z	70866492	70947773	2.25625	4.1e-16	8.17e-15	up	137	163	67	103	127	124	125	8	19	13	32	41	15	16	ENSGALG00000044654	15	664843	665327
ENSGALG00000010798	DHCR24	8	25334710	25342916	1.62953	3.64e-13	4.57e-12	up	490	208	324	281	246	419	348	53	71	94	64	151	93	77	ENSGALG00000034258	25	2122986	2126150
ENSGALG00000031013	DHDH	AADN04000777.1	34106	38591	1.78847	3.36e-18	9.13e-17	down	41	42	38	54	65	58	59	120	103	92	194	187	103	194	ENSGALG00000041792	26	4312154	4343994
ENSGALG00000010873	DHRS9	7	18953651	18957783	1.00503	0.0209049	0.0406694	down	15	4	6	22	19	6	4	26	17	24	18	13	8	13	ENSGALG00000002881	26	4615588	4620386
ENSGALG00000014700	DHX29	Z	16737588	16761324	2.7042	3.24e-26	3.03e-24	up	525	472	211	211	232	307	371	31	31	30	51	71	40	34	ENSGALG00000000551	26	1608779	1626550
ENSGALG00000032305	DHX8	27	3568955	3579074	1.02163	8.46e-18	2.21e-16	up	953	873	717	757	759	661	827	208	304	268	314	455	311	340	ENSGALG00000016148	1	109107584	109141826
ENSGALG00000016937	DIAPH3	1	162382843	162527048	1.51673	8.4e-16	1.6e-14	up	186	96	121	153	102	125	148	35	36	48	29	49	25	37	ENSGALG00000034014	24	2734	33641
ENSGALG00000010999	DICER1	5	45907275	45950884	1.32845	2.39e-13	3.08e-12	up	800	819	597	585	486	589	762	110	211	169	234	359	206	208	ENSGALG00000017314	1	195778483	195812181
ENSGALG00000026005	DIO2	5	40594965	40606615	3.66957	9.64e-16	1.82e-14	up	68	28	40	25	53	41	95	1	1	3	3	3	3	8	ENSGALG00000001273	28	2655668	2656909
ENSGALG00000033433	DIO3	5	49376782	49378262	1.26306	1.36e-07	7e-07	down	35	40	48	94	56	40	38	93	82	125	115	62	84	101	ENSGALG00000013210	1	66556785	66622909
ENSGALG00000034965	DIP2B	33	161165	219490	1.36878	5.89e-16	1.15e-14	up	1767	1491	1028	1064	1042	917	1433	251	334	362	504	532	355	380	ENSGALG00000012721	2	62287918	62301491
ENSGALG00000026955	DIRAS1	28	3289608	3290204	1.24419	0.000689054	0.0018495	down	4	2	10	16	14	10	11	26	14	20	21	16	12	16	ENSGALG00000039536	2	108833160	108835660
ENSGALG00000032632	DIRC2	7	26633177	26689362	1.14796	1.53e-13	2.01e-12	up	429	379	337	365	379	450	481	86	139	103	160	236	141	165	ENSGALG00000043690	1	135506245	135509378
ENSGALG00000039349	DISC1	3	39594353	39768545	1.24047	2.31e-15	4.09e-14	up	134	127	98	104	130	94	114	27	33	35	41	55	36	45	ENSGALG00000046449	3	97601213	97603751
ENSGALG00000007904	DLAT	24	6158727	6165163	1.01023	6.54e-16	1.27e-14	up	1182	1210	900	964	987	1029	1161	289	370	366	445	621	376	510	ENSGALG00000043322	7	10030005	10033873
ENSGALG00000005826	DLEC1	2	4698534	4734741	1.00684	4.23e-08	2.35e-07	down	114	88	97	67	114	71	100	154	194	156	167	155	82	138	ENSGALG00000045407	3	105704408	105706055
ENSGALG00000032980	DLGAP3	23	4445337	4454149	1.12282	0.00807297	0.017385	down	16	3	1	8	13	12	6	18	19	10	11	21	8	16	ENSGALG00000033017	7	192383	196571
ENSGALG00000012165	DLGAP5	5	56376119	56394486	1.01731	4.4e-12	4.65e-11	up	1047	651	842	889	562	657	699	238	272	358	245	358	315	317	ENSGALG00000030038	AADN04001210.1	6888	29576
ENSGALG00000008514	DLL4	5	24405626	24413310	1.2541	1.04e-11	1.03e-10	up	737	633	404	364	516	395	559	145	116	186	172	244	178	168	ENSGALG00000013218	1	66846831	66850139
ENSGALG00000018439	DLX1	7	17923778	17925509	1.2092	0.0109655	0.0228484	down	3	4	4	4	6	3	3	11	5	12	5	4	7	5	ENSGALG00000009219	3	16956960	16990165
ENSGALG00000009129	DLX5	2	24479856	24482255	1.80209	2.27e-07	1.13e-06	down	5	4	3	11	7	10	6	22	21	22	18	13	11	20	ENSGALG00000011193	3	41289363	41292070
ENSGALG00000010104	DMAP1	8	20492217	20518694	1.51582	2.1e-19	6.99e-18	up	267	252	209	218	202	228	284	48	54	37	74	108	70	77	ENSGALG00000015316	3	68158515	68162694
ENSGALG00000046331	DMBT1L	LGE64	598983	613921	2.91063	0.0161302	0.0322134	up	5	20	0	6	15	1	0	1	3	1	0	0	0	0	ENSGALG00000007182	12	13146916	13155374
ENSGALG00000004491	DMGDH	Z	22463196	22497298	1.10607	6.13e-05	0.00020048	down	13	11	11	14	16	12	14	32	22	28	19	19	13	22	ENSGALG00000002240	12	1772019	1778134
ENSGALG00000012997	DNAH5	2	76844724	76973325	1.07908	0.00187861	0.0046338	down	20	69	44	31	20	14	44	29	67	68	88	81	27	54	ENSGALG00000026293	9	23065441	23069345
ENSGALG00000023066	DNAJA1	Z	70593750	70601481	1.20066	4.3e-24	3.05e-22	up	3601	3107	2445	3666	3571	2525	2393	971	941	1044	972	1298	1021	1146	ENSGALG00000015402	1	88820570	88827636
ENSGALG00000033251	DNAJB1	AADN04010050.1	598	1220	1.54186	4.93e-10	3.72e-09	up	290	268	221	381	541	262	334	65	78	45	101	187	80	85	ENSGALG00000002347	9	10928331	10941709
ENSGALG00000003387	DNAJC21	Z	10568208	10582270	1.02509	6.89e-08	3.71e-07	up	519	529	331	302	297	425	338	129	120	99	165	235	156	184	ENSGALG00000041631	9	3520676	3538041
ENSGALG00000035378	DNAJC5	20	9720725	9736891	2.3856	9.09e-30	1.34e-27	up	260	273	159	136	201	170	270	23	27	27	31	51	34	33	ENSGALG00000032231	16	58543	72898
ENSGALG00000000790	DNAJC8	23	1558286	1572115	1.18856	2.2e-22	1.17e-20	up	1353	1453	1462	1578	1261	1310	1317	343	628	343	542	648	389	560	ENSGALG00000001175	26	2686743	2697121
ENSGALG00000001996	DNALI1	23	3762543	3766166	1.1505	5.89e-08	3.2e-07	down	44	38	51	55	49	61	59	112	102	128	77	71	60	75	ENSGALG00000027885	4	70320126	70322177
ENSGALG00000028790	DNASE2B	8	16666749	16675946	1.40958	4.4e-24	3.11e-22	up	744	656	468	657	478	483	668	134	223	137	161	223	149	229	ENSGALG00000010108	4	34283512	34287993
ENSGALG00000041461	DNMT3B	20	10452242	10464723	1.35134	5e-22	2.47e-20	down	512	426	459	484	679	560	574	1149	1179	1158	1249	1076	750	938	ENSGALG00000045983	4	22161538	22193169
ENSGALG00000005030	DOCK10	9	8507495	8609908	1.22508	2.39e-11	2.23e-10	up	1720	1695	1400	1721	1057	839	1050	373	483	551	366	382	476	587	ENSGALG00000009432	4	22075388	22076726
ENSGALG00000002080	DOCK2	13	3962515	4122445	2.32337	2.6e-14	3.89e-13	up	1917	1592	1605	1818	924	465	634	121	192	275	107	298	221	217	ENSGALG00000013287	4	61426155	61433974
ENSGALG00000009480	DOCK4	1	27184787	27262852	1.28267	4.77e-09	3.1e-08	up	265	364	208	192	229	191	263	52	72	40	110	133	79	85	ENSGALG00000001565	17	8801959	8828360
ENSGALG00000013753	DOK6	2	94050944	94295278	1.53299	4.95e-05	0.000164467	up	34	31	13	10	33	23	31	11	7	6	8	7	6	3	ENSGALG00000006077	5	11543973	11549741
ENSGALG00000036396	DPM3	AADN04012585.1	3495	4411	1.59243	2.09e-14	3.19e-13	down	48	58	56	81	86	74	79	195	197	204	104	121	175	148	ENSGALG00000007941	5	19521772	19561907
ENSGALG00000004559	DPY19L3	11	9911557	9937723	1.10487	6.69e-13	8.03e-12	up	208	194	155	161	176	130	228	60	52	60	80	85	70	57	ENSGALG00000042103	5	21670426	21671409
ENSGALG00000005509	DPYD	8	12568769	12891574	1.30863	1.23e-09	8.7e-09	up	1236	1242	989	794	992	1216	1424	151	397	248	398	662	348	402	ENSGALG00000012379	5	58218690	58231377
ENSGALG00000016591	DRC1	3	105784558	105796565	1.33974	0.000571394	0.00155993	down	6	12	10	10	15	7	11	28	31	22	27	16	14	4	ENSGALG00000020454	5	26192258	26194122
ENSGALG00000042505	DSEL	2	94976376	94980026	1.78978	4.38e-07	2.07e-06	up	724	1348	690	762	725	515	340	148	199	81	172	106	387	73	ENSGALG00000009801	5	31454003	31569444
ENSGALG00000015142	DSG2	2	106423071	106443930	1.95078	9.7e-08	5.09e-07	up	4379	4714	2034	2018	3638	3476	6093	230	735	204	1032	1692	614	1139	ENSGALG00000029332	5	860498	867769
ENSGALG00000010835	DTX4	5	16911791	16917496	1.12477	8.5e-14	1.17e-12	up	778	689	660	809	776	662	820	172	290	159	333	418	255	300	ENSGALG00000012909	2	69423477	69434351
ENSGALG00000041510	DUOX2	10	974526	991525	1.3834	0.000285467	0.000823687	down	5	5	8	6	8	15	14	27	14	27	10	12	16	19	ENSGALG00000006371	13	15766362	15766928
ENSGALG00000005017	DUSP13	6	14916880	14938836	1.63018	0.0130609	0.0266956	down	2	0	0	4	8	2	9	6	18	5	13	12	6	2	ENSGALG00000027512	Z	49956074	49965412
ENSGALG00000027397	DUSP22	2	66666136	66691910	2.29217	8.75e-11	7.48e-10	up	710	547	322	262	383	435	768	19	55	40	106	193	67	97	ENSGALG00000027654	2	79482210	79491991
ENSGALG00000001633	DUSP26	22	1636348	1640580	1.39992	3.52e-11	3.19e-10	down	82	71	72	84	110	127	156	263	267	223	197	216	138	165	ENSGALG00000033098	Z	13273783	13276634
ENSGALG00000000399	DUSP28	9	2677578	2680770	1.46691	1.73e-08	1.03e-07	down	37	20	40	35	47	39	29	103	82	115	58	75	39	68	ENSGALG00000014840	Z	12966009	12990144
ENSGALG00000041650	DUSP7	12	254374	261731	1.22078	2.61e-17	6.32e-16	up	4149	3366	2630	3334	3126	3040	2817	722	1185	775	945	1492	1262	1393	ENSGALG00000028570	26	3198471	3207046
ENSGALG00000001600	DVL1	21	2268370	2322090	1.16065	1.33e-14	2.1e-13	up	519	488	381	459	491	484	520	109	144	189	152	265	197	143	ENSGALG00000028653	3	76769557	76776520
ENSGALG00000016053	DYRK1A	1	107160884	107182204	1.31622	4.58e-18	1.23e-16	up	555	460	392	353	411	368	448	101	106	110	182	195	123	148	ENSGALG00000045522	3	59239901	59251787
ENSGALG00000031340	E2F7	1	38293246	38308943	2.5722	1.48e-22	8.18e-21	up	201	112	137	153	119	129	129	8	25	15	20	43	9	14	ENSGALG00000013628	2	90537420	90543245
ENSGALG00000033379	EAF1	2	41529523	41548334	1.36303	1.68e-10	1.38e-09	up	205	187	181	138	131	186	163	37	60	27	68	96	49	39	ENSGALG00000014835	Z	12937309	12956457
ENSGALG00000043823	ECSIT	AADN04001212.1	20082	22840	1.06058	7.49e-12	7.62e-11	down	218	306	292	367	373	330	313	587	529	647	419	449	442	556	ENSGALG00000008136	7	11045877	11050912
ENSGALG00000031763	EDARADD	3	37886878	37905405	1.05807	1.97e-07	9.94e-07	up	561	564	661	741	388	323	470	115	209	140	187	321	204	265	ENSGALG00000012113	7	28536905	28547075
ENSGALG00000008320	EDEM1	12	18660231	18670239	1.94009	4.04e-18	1.09e-16	up	1846	1362	1105	1093	1205	811	1333	135	218	161	319	484	225	316	ENSGALG00000040161	2	51316212	51320345
ENSGALG00000004806	EDEM3	8	7949695	7975752	1.90819	3.98e-20	1.49e-18	up	1894	1861	1152	1055	1500	1460	1948	216	278	185	392	579	348	353	ENSGALG00000034380	14	12372238	12378779
ENSGALG00000015630	EDIL3	Z	62158975	62431421	2.03048	7.33e-06	2.82e-05	up	23	6	22	29	19	42	38	3	3	2	6	8	10	3	ENSGALG00000011021	2	31824634	31844264
ENSGALG00000016912	EDNRB	1	153918344	153932319	1.1155	2.92e-07	1.42e-06	up	782	702	454	540	920	862	1256	266	308	225	426	199	285	313	ENSGALG00000004055	14	2277633	2300490
ENSGALG00000045949	EFCAB10	1	14012404	14013602	1.09375	1.31e-05	4.83e-05	down	10	13	17	13	14	16	19	15	37	24	21	31	23	24	ENSGALG00000010850	8	25885358	25901235
ENSGALG00000010446	EFCAB14	8	21927175	21939664	1.06279	2.99e-11	2.74e-10	up	1437	1368	906	950	965	1104	1442	339	466	296	536	643	353	528	ENSGALG00000010853	8	25905426	25921408
ENSGALG00000028017	EFCAB2	3	34744560	34755634	1.01118	2.81e-05	9.76e-05	down	29	24	17	23	28	14	17	36	45	30	27	27	47	31	ENSGALG00000040644	17	1003902	1006332
ENSGALG00000037901	EFEMP1	3	242964	294071	1.24205	3.47e-15	5.99e-14	up	2511	1992	1976	2973	2946	3232	3418	717	853	1068	1193	982	632	978	ENSGALG00000023490	8	14267802	14275723
ENSGALG00000001428	EFHD1	9	950201	964519	1.47365	1.78e-08	1.06e-07	up	3522	2803	2295	2031	2229	2675	2784	353	742	282	895	1580	769	806	ENSGALG00000005080	8	10013056	10034247
ENSGALG00000029175	EFNB2	1	141049589	141090557	1.78729	4.74e-08	2.61e-07	up	169	165	89	102	133	125	129	15	13	15	47	72	16	39	ENSGALG00000008670	8	16358348	16360327
ENSGALG00000039533	EFR3A	2	141406000	141466443	1.31493	2.34e-26	2.21e-24	up	1448	1224	945	970	986	1147	1419	272	380	334	413	496	331	403	ENSGALG00000034561	2	116286317	116395434
ENSGALG00000041422	EGLN1	3	39857052	39884582	1.04301	3.61e-09	2.38e-08	up	1872	1381	1153	1272	1533	1456	1894	313	543	395	706	840	694	646	ENSGALG00000038971	2	127040534	127051879
ENSGALG00000010001	EGLN3	5	35742881	35767270	1.25831	5.3e-10	3.97e-09	up	334	341	219	206	290	257	365	49	89	74	126	161	95	87	ENSGALG00000037992	2	125263781	125267940
ENSGALG00000008950	EHD4	5	25303432	25323201	2.1474	2.98e-18	8.17e-17	up	564	507	300	297	516	528	750	57	69	62	131	159	63	93	ENSGALG00000006539	9	4383100	4389373
ENSGALG00000008376	EIF2B5	9	15822002	15836692	1.136	5.88e-18	1.56e-16	up	725	733	631	691	643	619	776	180	219	168	281	384	249	287	ENSGALG00000040264	9	1045745	1052220
ENSGALG00000009328	EIF3A	6	30000752	30026081	1.16559	4.89e-12	5.14e-11	up	3917	3883	3147	3745	3186	3136	3761	752	1092	848	1426	2285	1205	1360	ENSGALG00000040773	17	8203404	8204513
ENSGALG00000014678	ELL2	Z	57266068	57319138	1.71623	1.59e-07	8.08e-07	up	61	90	53	41	53	64	61	11	2	10	24	28	15	14	ENSGALG00000023454	2	6221209	6227096
ENSGALG00000009836	ELMOD2	4	29930851	29937844	1.2672	2.3e-11	2.16e-10	up	483	571	366	354	411	442	589	112	106	102	157	259	171	172	ENSGALG00000046225	Z	7663787	7667823
ENSGALG00000009282	ELMSAN1	5	26124345	26142266	1.18342	6.12e-09	3.91e-08	up	395	303	213	221	339	294	389	62	98	73	148	175	97	115	ENSGALG00000012589	Z	40068519	40076051
ENSGALG00000014730	ELOVL7	Z	18878165	18908770	1.35328	0.000240553	0.000702972	up	1104	1095	589	447	668	1057	906	74	255	51	332	514	324	348	ENSGALG00000001864	Z	68714996	68729199
ENSGALG00000001947	ELP1	Z	70551166	70582389	1.09149	7.09e-09	4.47e-08	up	1657	1452	817	904	808	1263	786	338	348	332	439	542	411	493	ENSGALG00000004152	17	6169694	6174359
ENSGALG00000014877	EMB	Z	14736701	14761276	1.84561	1.86e-25	1.58e-23	up	808	783	649	706	484	510	410	101	154	103	178	175	106	159	ENSGALG00000035136	Z	66338169	66379299
ENSGALG00000002276	EME2	14	13277094	13283352	1.05963	7.69e-12	7.81e-11	down	101	106	100	140	121	94	106	159	180	250	161	144	167	206	ENSGALG00000026001	Z	35619238	35636023
ENSGALG00000014930	ENC1	Z	24273768	24275537	2.59484	8.42e-27	8.33e-25	up	228	228	124	126	164	254	170	10	25	27	35	30	18	28	ENSGALG00000002993	18	5218244	5378213
ENSGALG00000017205	ENDOD1	1	185517114	185523746	1.08797	0.00022513	0.000662398	up	340	192	231	319	419	411	850	88	142	84	213	255	122	146	ENSGALG00000003456	10	4027277	4045255
ENSGALG00000031410	ENPEP	4	58197816	58231230	1.53235	1.59e-05	5.79e-05	up	7957	19063	8701	5831	14368	8186	10824	761	3168	1266	3288	6697	2048	4426	ENSGALG00000033428	2	123250307	123260107
ENSGALG00000034397	ENPP1	3	57378297	57417465	1.04747	0.000128783	0.000396834	up	696	709	303	300	492	431	680	94	123	268	159	354	205	205	ENSGALG00000030781	2	123391257	123408736
ENSGALG00000010645	ENPP6	4	39859216	39882596	1.47689	5.87e-08	3.19e-07	up	5800	4243	2580	1774	3253	2844	3637	452	1039	464	1383	1537	1092	1100	ENSGALG00000033700	2	123303858	123315427
ENSGALG00000010202	ENTPD5	5	37750948	37767273	1.21205	7.72e-06	2.96e-05	up	2471	2269	1298	1019	1803	1116	1930	282	475	351	651	1229	685	523	ENSGALG00000037975	2	123334374	123350075
ENSGALG00000027247	EOMES	2	38739416	38744142	1.0813	0.0135154	0.0275412	up	221	114	256	266	156	21	45	27	57	72	29	55	80	86	ENSGALG00000005360	19	8119355	8136085
ENSGALG00000010005	EPAS1	3	26625940	26701895	1.54944	4.45e-12	4.71e-11	up	7218	6424	4952	4860	6158	6214	8608	881	1320	954	2315	3018	1648	2233	ENSGALG00000005855	11	18224587	18236644
ENSGALG00000001329	EPB41	23	2610406	2669406	1.65298	6.43e-20	2.35e-18	up	1156	958	743	838	615	478	558	196	171	211	180	204	193	193	ENSGALG00000033720	11	11454156	11462000
ENSGALG00000036259	EPG5	Z	2176956	2224068	1.31734	5.59e-10	4.17e-09	up	819	758	376	377	410	497	384	106	175	130	187	233	175	168	ENSGALG00000039145	2	113065522	113115947
ENSGALG00000010859	EPGN	4	45019071	45027787	1.35841	1.76e-05	6.34e-05	down	8	17	5	6	15	9	21	21	28	22	24	17	29	24	ENSGALG00000021340	Z	9226405	9236499
ENSGALG00000015403	EPHA3	1	89165149	89382603	1.33584	0.00088347	0.00232613	up	147	65	86	243	312	332	438	75	91	14	90	114	60	74	ENSGALG00000001765	Z	68485992	68502940
ENSGALG00000021567	EPHA8	21	6128022	6154299	1.98693	2.45e-07	1.21e-06	down	8	3	3	14	6	6	4	30	22	22	20	19	11	13	ENSGALG00000027262	9	5419310	5452363
ENSGALG00000004741	EPHB2	21	5954684	6063215	1.00459	3.8e-11	3.42e-10	up	942	911	1037	975	1039	1180	1147	257	452	248	435	591	484	450	ENSGALG00000017005	1	169147469	169208168
ENSGALG00000021601	EPS15L1	28	4356516	4388732	1.4098	4.61e-19	1.45e-17	up	459	457	318	337	375	315	487	75	108	107	153	173	101	115	ENSGALG00000006363	15	8171948	8263856
ENSGALG00000043025	EPS8L2	5	454589	479990	1.50998	2.27e-05	8.04e-05	up	6792	6164	3203	2226	3723	4147	6460	509	950	426	1734	3434	1128	1340	ENSGALG00000014998	2	103216424	103248307
ENSGALG00000011269	EPYC	1	43925156	43947733	1.49265	1.34e-05	4.92e-05	down	12	9	6	9	6	11	6	17	19	30	20	8	18	19	ENSGALG00000005345	20	8133125	8139309
ENSGALG00000014684	ERAP1	Z	57003242	57017676	1.1867	8.45e-06	3.22e-05	up	6051	4677	2248	2022	1869	2969	2158	1024	996	576	1131	1524	1231	1303	ENSGALG00000007116	15	9253510	9264664
ENSGALG00000014773	ERBIN	Z	20753850	20841105	1.19545	4.28e-17	9.96e-16	up	3099	2812	1950	2027	1968	2035	2311	599	668	694	871	1174	779	909	ENSGALG00000037497	5	380959	383539
ENSGALG00000012994	ERC1	1	60628356	60904443	1.79649	6.4e-23	3.74e-21	up	231	235	190	203	275	253	306	51	50	26	76	80	52	57	ENSGALG00000040463	15	11109163	11113245
ENSGALG00000003092	ERLIN2	22	2202505	2211560	1.46517	1.67e-22	9.09e-21	up	1361	1441	1153	1036	1180	1189	1400	228	349	264	437	582	330	382	ENSGALG00000034132	17	7402296	7408519
ENSGALG00000000438	ERMP1	Z	27772155	27788263	1.49873	6.42e-12	6.61e-11	up	809	756	441	344	404	413	557	80	144	128	195	204	161	151	ENSGALG00000011024	8	28175499	28257343
ENSGALG00000040000	ERO1B	3	37916515	37937367	1.39112	7.31e-16	1.4e-14	up	438	445	400	393	344	231	347	76	97	125	115	181	89	114	ENSGALG00000037131	AADN04002271.1	12	20475
ENSGALG00000027707	ESM1	Z	16628134	16634499	1.84846	7.22e-09	4.56e-08	up	22	33	28	26	44	37	32	8	4	6	7	4	13	7	ENSGALG00000008456	17	2601746	2859437
ENSGALG00000041775	ESRRB	5	38681505	38799468	2.39546	0.000322619	0.000921833	up	8	14	4	5	16	7	5	0	1	3	1	1	1	2	ENSGALG00000013022	1	61471636	61671542
ENSGALG00000009645	ESRRG	3	19997179	20358337	1.46508	2.78e-06	1.15e-05	up	231	210	125	137	157	262	274	24	23	34	78	118	67	68	ENSGALG00000005332	12	7053449	7219032
ENSGALG00000034741	ETNPPL	4	37934303	37947629	1.10557	1.31e-06	5.72e-06	down	44	69	95	117	67	50	74	123	102	190	99	146	98	120	ENSGALG00000003833	8	5721919	5794586
ENSGALG00000001143	ETS1	24	878535	944202	2.35834	2.53e-42	2.34e-39	up	1064	1112	872	976	687	541	683	118	123	123	158	180	121	102	ENSGALG00000007623	18	10279329	10388753
ENSGALG00000039084	EVI2A	19	9048010	9051562	1.15601	0.0027188	0.00649585	up	498	375	535	835	268	99	196	80	143	188	42	176	192	177	ENSGALG00000005215	14	5264613	5339317
ENSGALG00000029202	EVI5L	AADN04004158.1	4343	13428	1.25506	3.02e-18	8.27e-17	up	157	126	112	127	125	110	121	37	34	39	34	54	44	52	ENSGALG00000008486	1	10220631	10584619
ENSGALG00000037310	EVX1	2	32772492	32775757	3.04335	0.00103862	0.00269325	down	1	2	1	2	0	2	0	1	15	23	9	1	1	2	ENSGALG00000038242	12	1481230	1608215
ENSGALG00000043064	EXFABP	17	992193	995196	1.33365	0.00398027	0.00918031	up	1889	1792	1342	2455	1571	451	403	344	595	446	88	350	658	631	ENSGALG00000005400	12	7323310	7733469
ENSGALG00000011443	EXOC3L4	5	50184538	50205051	1.1386	3.52e-06	1.43e-05	up	1019	992	680	460	469	532	680	123	315	158	215	446	256	281	ENSGALG00000025788	27	4527283	4531060
ENSGALG00000008477	EXOC4	1	1421469	1841500	1.14027	9.6e-17	2.12e-15	up	1180	1297	1056	1282	1029	1023	1430	382	353	311	456	699	418	404	ENSGALG00000008591	2	19149202	19371796
ENSGALG00000016098	EXOC6B	4	90458524	90697579	1.13716	9.41e-05	0.000297419	up	281	274	125	137	182	208	275	38	61	47	111	172	50	73	ENSGALG00000035466	AADN04000639.1	104169	125545
ENSGALG00000039917	EXOSC1	6	22341902	22343055	1.12644	2.28e-14	3.44e-13	down	151	182	223	208	201	208	159	315	318	400	307	257	353	357	ENSGALG00000027771	18	7298229	7304614
ENSGALG00000002426	EXOSC3	6	4414242	4417915	1.17355	2.09e-18	5.87e-17	down	109	108	115	137	119	124	111	226	220	204	175	170	247	229	ENSGALG00000031977	1	51688915	51735455
ENSGALG00000038101	EXOSC5	AADN04014327.1	715	2618	1.3506	4.61e-28	5.47e-26	down	139	144	189	170	177	158	141	327	370	357	256	323	300	339	ENSGALG00000038087	14	6779890	6797096
ENSGALG00000031542	EXT2	5	21728195	21799637	1.93826	2.23e-23	1.41e-21	up	958	815	624	588	765	694	923	68	164	117	188	252	151	198	ENSGALG00000026091	18	7311190	7346982
ENSGALG00000004508	EYA2	20	5843310	5951540	1.08645	0.000209064	0.000618864	down	13	23	13	31	29	9	22	38	47	26	41	28	35	20	ENSGALG00000003911	18	7370025	7381626
ENSGALG00000026677	F10	1	137579845	137592401	1.03953	1.05e-07	5.48e-07	up	293	248	196	270	260	123	310	57	117	68	124	113	79	106	ENSGALG00000042886	AADN04008330.1	656	8497
ENSGALG00000012802	F13A1	2	65247235	65305803	1.51114	3.66e-09	2.42e-08	up	235	125	84	68	125	99	130	26	44	32	42	39	22	39	ENSGALG00000024391	28	1025610	1032563
ENSGALG00000014983	F2R	Z	23448238	23455214	2.59971	3.51e-22	1.79e-20	up	85	105	82	67	92	83	82	2	5	13	20	11	12	16	ENSGALG00000009314	6	29837690	29877252
ENSGALG00000044485	F2RL3	28	4271865	4272893	1.70939	5.56e-12	5.8e-11	up	75	70	100	73	91	137	87	14	19	16	25	28	14	41	ENSGALG00000004554	8	7122597	7129183
ENSGALG00000006513	F9	4	5049715	5062317	1.39803	0.0101218	0.0212772	down	3	7	3	11	3	8	1	8	18	7	2	24	12	6	ENSGALG00000014582	24	4670461	4826288
ENSGALG00000030025	FABP4	2	121975264	121978486	1.68278	0.0131589	0.026874	down	245	128	150	105	86	11	12	61	144	598	87	536	302	168	ENSGALG00000043393	1	93328062	93520050
ENSGALG00000007625	FADD	5	17814653	17816686	1.97252	3.92e-16	7.87e-15	up	1087	1146	748	743	663	728	850	87	142	87	190	361	175	202	ENSGALG00000036925	25	2491925	2496892
ENSGALG00000031615	FAIM2	33	1421845	1435440	1.76775	1.92e-15	3.42e-14	up	72	86	75	111	121	119	102	19	17	11	34	34	21	26	ENSGALG00000008926	1	22528298	22829235
ENSGALG00000005074	FAM102A	17	5367397	5398325	1.0903	3.24e-06	1.32e-05	up	520	481	348	315	424	435	617	84	158	89	272	269	141	187	ENSGALG00000032282	2	124959171	124977043
ENSGALG00000007139	FAM107A	12	11881511	11895605	1.18566	0.000808184	0.00214623	up	55	51	19	22	48	58	53	8	16	4	20	30	13	19	ENSGALG00000026903	11	1547073	1551636
ENSGALG00000033226	FAM107B	1	7293529	7352456	2.61827	1.36e-27	1.56e-25	up	909	629	791	729	380	304	386	64	61	64	64	105	87	93	ENSGALG00000006054	5	10532056	10544141
ENSGALG00000008466	FAM117B	7	11983467	12006349	1.89037	3.7e-13	4.65e-12	up	276	230	124	126	173	158	232	18	43	24	46	81	35	43	ENSGALG00000001525	27	3710068	3718422
ENSGALG00000011180	FAM120B	3	40904572	40967021	1.14927	5.65e-13	6.87e-12	up	480	418	402	337	367	319	534	99	161	107	136	240	139	159	ENSGALG00000009509	2	23088761	23152574
ENSGALG00000020869	FAM126B	7	11398840	11423739	1.0519	2.52e-08	1.46e-07	up	166	151	110	109	147	121	140	27	56	44	60	87	36	59	ENSGALG00000002632	7	1088699	1148350
ENSGALG00000041706	FAM13B	13	14363063	14417135	1.51772	1.73e-16	3.67e-15	up	2241	2322	1488	1419	1363	1712	2200	304	484	341	504	789	574	608	ENSGALG00000033471	1	62436030	62495064
ENSGALG00000041437	FAM155B	4	1118722	1134255	2.43915	9.01e-25	6.95e-23	up	94	116	143	97	94	106	149	11	17	5	25	26	16	19	ENSGALG00000008271	6	23644879	23646722
ENSGALG00000031404	FAM160B1	6	28026663	28057664	1.86101	6.16e-34	1.54e-31	up	578	570	520	590	518	474	687	69	101	94	142	188	145	133	ENSGALG00000008270	6	23638885	23639922
ENSGALG00000003301	FAM167B	23	5160100	5160357	1.31783	7.46e-07	3.4e-06	down	24	35	43	40	34	13	25	67	60	92	47	42	53	59	ENSGALG00000008273	6	23650152	23653222
ENSGALG00000017323	FAM168A	1	195485344	195633641	1.01351	1.46e-06	6.31e-06	up	84	86	115	136	118	109	148	42	26	64	55	54	29	43	ENSGALG00000038162	3	64002722	64010618
ENSGALG00000002172	FAM168B	9	2246417	2260224	1.84937	1.9e-31	3.49e-29	up	333	284	215	248	268	245	334	40	61	44	59	101	57	69	ENSGALG00000014962	3	64018364	64020812
ENSGALG00000014661	FAM172A	Z	58092017	58355057	1.61613	2.56e-13	3.29e-12	up	862	740	387	427	392	695	411	117	126	96	163	224	138	169	ENSGALG00000026445	5	43916855	43927634
ENSGALG00000013043	FAM173B	2	78648929	78656994	1.76061	4.09e-14	5.97e-13	up	76	47	54	54	65	54	76	7	16	11	23	20	9	15	ENSGALG00000010023	3	27205249	27217780
ENSGALG00000006887	FAM174B	10	14562721	14572022	1.98579	7.14e-12	7.29e-11	up	95	71	47	39	54	64	95	10	7	14	16	24	14	9	ENSGALG00000008424	1	1133309	1134331
ENSGALG00000028459	FAM180A	1	58388267	58415575	1.29221	0.0163203	0.032558	down	2	1	1	4	1	5	5	7	7	4	4	6	4	5	ENSGALG00000007979	10	19160880	19163547
ENSGALG00000009033	FAM183BP	8	19683035	19684906	2.0451	1.19e-05	4.41e-05	down	2	1	5	5	4	3	2	14	13	11	8	12	10	4	ENSGALG00000001122	19	939567	1038785
ENSGALG00000008872	FAM199X	4	16801364	16810193	1.70157	1.72e-21	7.76e-20	up	313	365	236	268	280	244	299	41	76	47	83	123	56	74	ENSGALG00000040368	30	10644	14298
ENSGALG00000042228	FAM19A4	12	15221201	15261899	1.956	0.0169838	0.0337724	up	3	5	6	5	2	5	3	0	1	2	0	0	0	3	ENSGALG00000003914	28	4351995	4355222
ENSGALG00000019524	FAM206A	2	88855233	88857335	1.05893	3.49e-10	2.7e-09	down	166	169	215	243	213	153	200	377	395	392	266	246	285	270	ENSGALG00000029912	12	11500177	11502890
ENSGALG00000005821	FAM219A	Z	7676383	7770624	2.0099	1.34e-10	1.11e-09	up	131	87	52	56	84	74	118	7	16	8	34	27	12	17	ENSGALG00000033051	1	6522549	6602832
ENSGALG00000010977	FAM221A	2	31384712	31391148	1.26098	0.0167875	0.0334323	down	2	9	4	7	7	3	1	4	3	7	13	9	19	8	ENSGALG00000001319	26	3106195	3112647
ENSGALG00000013624	FAM65B	2	90472344	90506067	1.40101	2.84e-08	1.63e-07	up	1073	1026	871	965	508	329	509	190	228	272	139	344	217	208	ENSGALG00000005621	13	13192090	13212308
ENSGALG00000013703	FAM69C	2	92188771	92199483	1.24127	0.00893819	0.0190394	down	7	4	5	9	12	31	16	44	28	6	26	17	19	17	ENSGALG00000033061	22	4681046	4697103
ENSGALG00000003789	FAM78A	17	6604164	6609807	1.64639	8.29e-13	9.79e-12	up	239	230	171	207	138	103	113	28	51	52	32	66	39	40	ENSGALG00000041635	4	56907532	57062174
ENSGALG00000016459	FAM84A	3	99002478	99004421	1.1476	1.01e-07	5.29e-07	up	99	69	138	111	95	67	67	24	27	42	39	36	28	37	ENSGALG00000005088	6	15570960	15678544
ENSGALG00000041233	FAM84B	2	139401611	139404620	2.03927	7.27e-06	2.8e-05	up	47	17	15	11	25	18	40	4	6	1	6	11	3	3	ENSGALG00000045288	21	4882805	4883526
ENSGALG00000035478	FAM91A1	2	138265441	138289137	1.0635	2.75e-11	2.54e-10	up	561	606	447	397	457	416	523	150	184	116	263	254	153	195	ENSGALG00000045574	9	15922258	15923968
ENSGALG00000012618	FANCC	Z	41661025	41748825	1.1935	5.24e-09	3.38e-08	up	366	288	210	228	141	285	167	66	96	94	94	76	69	94	ENSGALG00000000244	Z	46532506	46697608
ENSGALG00000017291	FAR2	1	72973409	73086559	1.51052	1.49e-12	1.7e-11	up	1080	945	636	516	675	830	1249	151	220	167	293	404	201	252	ENSGALG00000001617	19	3300492	3382167
ENSGALG00000011823	FAT4	4	52866490	52987950	1.40734	4.15e-28	4.95e-26	up	783	845	808	860	791	971	928	216	217	241	236	224	314	350	ENSGALG00000035800	3	25574985	25772207
ENSGALG00000015489	FAXC	3	71749519	71765684	2.08734	1.21e-09	8.57e-09	up	26	25	27	28	27	43	26	9	3	1	8	5	4	8	ENSGALG00000035058	12	2545959	2551929
ENSGALG00000010747	FBLN5	5	44523932	44565644	1.29722	1.58e-08	9.45e-08	up	603	507	388	429	672	935	1108	204	243	187	304	172	185	208	ENSGALG00000006411	13	15798306	15801409
ENSGALG00000037625	FBN3	28	259255	381102	1.4772	1.07e-12	1.25e-11	up	406	162	176	268	169	243	219	74	74	75	65	62	48	69	ENSGALG00000001692	17	8664568	8692120
ENSGALG00000012612	FBP2	Z	41422559	41442998	1.36223	0.0116184	0.0240544	down	3	4	1	0	5	5	2	7	4	5	4	6	9	6	ENSGALG00000002145	8	1371788	1431564
ENSGALG00000005684	FBXL15	6	16980730	16982551	1.04328	1.5e-08	9.05e-08	up	134	136	104	122	159	126	174	46	39	37	58	91	57	44	ENSGALG00000039525	21	309659	433746
ENSGALG00000000276	FBXL17	Z	47686972	47974445	1.65659	5.67e-15	9.51e-14	up	248	180	140	122	167	182	182	21	54	29	49	66	55	39	ENSGALG00000008420	12	19497951	19512399
ENSGALG00000031947	FBXL7	2	76055776	76062199	1.4834	3.02e-23	1.84e-21	up	135	117	117	136	128	135	151	30	38	39	49	43	20	44	ENSGALG00000011822	18	9848600	9852237
ENSGALG00000010192	FBXO33	5	37697608	37713887	1.39417	1.83e-19	6.15e-18	up	542	318	332	431	388	289	363	74	100	105	133	150	131	117	ENSGALG00000032148	13	13539125	13555895
ENSGALG00000010507	FCRL4	25	2411319	2419611	1.29389	4.03e-16	8.07e-15	down	74	85	96	105	99	95	114	213	166	228	140	165	171	212	ENSGALG00000036294	23	5563597	5574294
ENSGALG00000038461	FECH	Z	380962	391867	2.82203	2.44e-27	2.64e-25	up	202	159	97	117	124	109	118	10	18	8	8	29	12	21	ENSGALG00000012715	2	62171926	62225717
ENSGALG00000004168	FEM1A	28	4883400	4886316	1.26926	8.47e-33	1.78e-30	up	1122	1011	910	998	985	890	1131	244	317	253	360	469	312	398	ENSGALG00000036175	AADN04001118.1	2180	6203
ENSGALG00000008204	FEM1C	Z	78897761	78911158	1.34527	4.94e-09	3.2e-08	up	251	189	118	118	121	183	160	36	34	38	63	88	53	50	ENSGALG00000041685	KQ759558.1	168	14763
ENSGALG00000000273	FER	Z	47508617	47596423	1.61014	5.64e-13	6.87e-12	up	336	259	119	133	191	238	210	47	57	57	50	82	47	51	ENSGALG00000034562	9	15747020	15756017
ENSGALG00000038885	FEZ1	24	124425	134392	1.32765	1.15e-09	8.16e-09	down	304	208	286	450	440	470	408	872	860	977	601	557	448	763	ENSGALG00000010186	3	30406110	30416492
ENSGALG00000009262	FGB	4	20472456	20478595	1.42116	0.00235746	0.00570096	up	86	133	165	205	46	16	48	14	27	21	17	67	15	53	ENSGALG00000020084	3	7870260	7906818
ENSGALG00000005237	FGD3	12	6711763	6813985	1.21915	2.58e-20	9.92e-19	up	1095	894	940	1093	641	688	860	249	258	338	281	358	300	340	ENSGALG00000009069	3	7746705	7769539
ENSGALG00000036971	FGF12	9	13369379	13557972	1.3493	2.53e-09	1.72e-08	down	110	81	128	161	153	144	208	412	309	317	203	191	231	302	ENSGALG00000002018	14	13496262	13507337
ENSGALG00000016866	FGF14	1	143252845	143354891	1.38915	4.37e-05	0.000147248	up	22	21	17	23	12	12	21	4	4	7	5	8	4	7	ENSGALG00000009360	3	17691064	17711286
ENSGALG00000041822	FGF22	28	2739634	2742740	1.04379	0.00309679	0.00731305	down	8	12	15	8	9	14	7	14	8	24	12	32	18	13	ENSGALG00000009050	5	25645574	25669788
ENSGALG00000025748	FGF9	1	178382192	178412065	1.24899	1.03e-12	1.2e-11	down	110	90	97	85	96	150	144	183	241	139	295	234	179	203	ENSGALG00000040478	1	193324498	193358592
ENSGALG00000014501	FGFBP2	4	77137751	77139658	1.02385	0.00484417	0.0109518	down	16	10	10	44	18	11	22	26	39	45	25	13	22	38	ENSGALG00000008006	4	13384418	13431218
ENSGALG00000011423	FGFR1OP	3	42625187	42644724	1.0947	4.48e-22	2.27e-20	up	347	314	321	316	285	283	299	77	122	85	121	145	119	146	ENSGALG00000041731	2	41636922	41662196
ENSGALG00000009268	FGG	4	20496742	20501963	1.97625	5.57e-05	0.000183681	up	76	98	43	36	8	35	21	21	9	6	6	5	9	7	ENSGALG00000009382	3	17716651	17731004
ENSGALG00000003866	FIBCD1	17	6509409	6515905	2.81377	0.0140405	0.0285015	down	0	1	0	1	0	0	0	0	1	2	3	4	2	1	ENSGALG00000045050	11	3763970	3765196
ENSGALG00000026285	FITM2	20	5612207	5614716	1.09587	1.89e-07	9.55e-07	up	207	153	128	127	157	146	205	47	48	32	61	116	58	63	ENSGALG00000013532	5	18454666	18487595
ENSGALG00000014331	FKBP4	1	75721961	75736104	1.10483	3.87e-26	3.53e-24	up	3552	3123	3403	4465	4054	3107	3459	1062	1223	1051	1448	1819	1318	1466	ENSGALG00000010208	1	37737256	37770744
ENSGALG00000015443	FKTN	Z	55041941	55055369	1.40476	1.86e-10	1.51e-09	up	278	243	174	136	171	243	210	34	49	44	88	100	57	74	ENSGALG00000013376	Z	10904844	10913020
ENSGALG00000001161	FLI1	24	988812	1059723	1.0413	9.32e-09	5.78e-08	up	1551	1216	1442	1502	970	616	840	350	479	492	426	488	434	483	ENSGALG00000001547	26	3532931	3542982
ENSGALG00000017091	FLT1	1	175837246	175938674	2.01386	4.25e-37	1.57e-34	up	316	409	279	310	409	356	455	47	57	72	96	86	65	80	ENSGALG00000043437	1	24865850	24895638
ENSGALG00000035726	FLT3	1	176034740	176060887	1.14467	0.00189429	0.00466751	up	303	242	262	319	185	39	110	54	57	118	34	69	95	93	ENSGALG00000013125	1	64278396	64279363
ENSGALG00000009807	FLVCR1	3	21802166	21810056	1.74232	3.95e-09	2.6e-08	up	519	516	305	202	390	365	546	43	73	39	165	153	106	113	ENSGALG00000004034	21	4679440	4732261
ENSGALG00000011856	FMC1	1	49141973	49142442	1.73056	1.54e-22	8.48e-21	down	35	38	60	69	69	57	73	174	152	161	133	135	143	155	ENSGALG00000042365	1	51268021	51286421
ENSGALG00000009723	FMN1	5	30438360	30554506	1.09794	1.24e-05	4.6e-05	up	736	671	438	382	537	641	835	140	208	90	263	432	219	266	ENSGALG00000004398	14	3435737	3475031
ENSGALG00000012525	FMNL2	7	35631158	35735887	1.20674	2.76e-12	3.01e-11	up	1088	1153	837	859	833	774	884	194	309	266	369	568	231	326	ENSGALG00000001889	17	8395197	8401638
ENSGALG00000034067	FMOD	26	5133650	5140211	1.0431	0.000856238	0.00226312	down	490	266	431	764	533	879	1114	1893	1049	1237	775	733	551	915	ENSGALG00000008474	7	12038585	12059982
ENSGALG00000009222	FNDC3B	9	19398182	19545817	1.50318	5.21e-25	4.11e-23	up	727	625	589	707	810	819	1007	190	195	183	266	309	161	191	ENSGALG00000042981	14	10077021	10104332
ENSGALG00000017462	FNIP1	13	16678225	16736631	1.11494	2.81e-09	1.89e-08	up	736	417	391	482	461	357	417	94	143	147	212	224	217	169	ENSGALG00000013605	2	90220685	90394975
ENSGALG00000010036	FOSL2	3	27455227	27465411	1.87585	6.98e-09	4.41e-08	up	747	462	220	212	364	392	615	55	71	35	142	171	73	122	ENSGALG00000021442	11	1199475	1217413
ENSGALG00000042686	FOXD3	8	27880432	27881903	1.30485	1.59e-08	9.54e-08	down	96	68	152	220	148	159	174	387	218	316	300	281	246	222	ENSGALG00000038527	KQ759530.1	14681	29334
ENSGALG00000008942	FOXN2	3	8915296	8942633	1.50609	2.34e-15	4.12e-14	up	592	513	416	360	358	343	578	88	106	90	148	216	102	150	ENSGALG00000015155	Z	36812397	36834373
ENSGALG00000010665	FOXN3	5	43435163	43613641	1.6206	7.53e-20	2.72e-18	up	278	243	185	175	206	199	324	44	65	49	74	90	46	53	ENSGALG00000043435	AADN04000612.1	7	3871
ENSGALG00000005658	FOXO4	4	2424103	2432970	2.14127	1.95e-23	1.23e-21	up	496	483	393	407	504	416	612	49	73	57	80	191	74	88	ENSGALG00000006427	5	13069629	13105290
ENSGALG00000043015	FOXS1	20	10262866	10263984	1.51701	5.81e-08	3.16e-07	down	33	15	10	33	20	20	20	67	50	44	62	52	39	26	ENSGALG00000016847	1	139172506	139199180
ENSGALG00000033671	FREM2	1	171352433	171447282	1.43208	0.000186143	0.000556536	up	62	260	85	88	190	130	81	22	24	22	72	30	70	26	ENSGALG00000038241	Z	73143821	73144683
ENSGALG00000009966	FRS2	1	35449509	35495133	1.05557	2.59e-07	1.27e-06	up	208	187	117	121	146	136	172	53	44	43	71	108	54	48	ENSGALG00000031813	27	4793851	4803966
ENSGALG00000015442	FSD1L	Z	55008370	55037122	1.49604	2.53e-07	1.24e-06	up	140	153	113	60	83	156	119	34	30	15	64	39	19	35	ENSGALG00000008208	10	19844203	19865420
ENSGALG00000009624	FSIP1	5	29562680	29633382	1.66703	3.9e-05	0.000132515	down	10	7	12	10	10	2	19	36	25	45	13	22	18	14	ENSGALG00000009653	2	23650426	23674646
ENSGALG00000041736	FSTL5	4	22955307	23194747	1.89005	0.000144627	0.000441394	up	52	15	76	39	25	13	75	15	1	7	10	12	3	15	ENSGALG00000042400	1	111777485	111982403
ENSGALG00000041036	FTO	11	4752497	4974830	1.7845	5.83e-07	2.71e-06	up	65	57	45	49	58	45	63	6	12	12	6	41	5	9	ENSGALG00000008034	18	10931921	10957831
ENSGALG00000013773	FUCA2	3	52590352	52599911	1.15316	1.61e-20	6.35e-19	up	525	497	450	439	458	456	508	115	216	141	177	258	145	158	ENSGALG00000046494	7	11477412	11485621
ENSGALG00000002648	FUK	11	1825436	1834812	1.02301	1.36e-08	8.22e-08	down	441	394	554	708	596	317	494	846	764	1090	730	649	725	794	ENSGALG00000036950	AADN04000662.1	80344	83137
ENSGALG00000029585	FUNDC2	4	2184257	2188075	1.92869	4.29e-16	8.52e-15	up	851	771	638	733	644	696	868	85	105	89	191	356	129	162	ENSGALG00000008346	7	11489044	11497197
ENSGALG00000022718	FUT4	1	185674161	185675231	3.32747	4.28e-20	1.59e-18	up	122	96	116	155	83	48	78	2	6	3	6	18	15	6	ENSGALG00000014698	1	77671018	77697005
ENSGALG00000034975	FUT7	17	946578	947621	1.06764	0.0133819	0.0272963	up	95	86	112	106	63	18	31	21	16	46	5	39	39	27	ENSGALG00000010638	4	39778505	39789210
ENSGALG00000007320	FXYD2	24	5375783	5377024	1.17735	0.00144517	0.00364633	down	11	9	5	12	28	19	15	42	29	26	27	13	16	23	ENSGALG00000012186	4	58517323	58526130
ENSGALG00000025937	FXYD6	24	5378495	5386474	1.1156	2.26e-11	2.12e-10	down	2163	2209	2523	3223	3581	3613	3315	5881	5740	6000	5021	4587	4132	3976	ENSGALG00000008933	6	27520205	27538328
ENSGALG00000003792	FYB	Z	12272092	12333739	2.50283	9.36e-14	1.28e-12	up	1422	1329	869	1019	639	289	474	61	119	144	49	143	181	154	ENSGALG00000008355	7	11502439	11508768
ENSGALG00000015022	FYN	3	66133306	66170780	1.01064	1.34e-18	3.89e-17	up	989	876	886	1015	731	601	752	276	306	318	379	374	325	337	ENSGALG00000015611	3	75700849	75718891
ENSGALG00000009064	FZD1	2	22162541	22164687	1.36709	3.86e-15	6.59e-14	up	928	1006	903	1472	1207	1553	1542	253	329	336	479	560	284	450	ENSGALG00000001366	21	4917508	4923271
ENSGALG00000017242	FZD4	1	188780367	188784802	1.00215	3.48e-15	6e-14	up	819	664	701	951	825	666	1005	299	289	381	363	293	250	351	ENSGALG00000015018	1	80446094	80476861
ENSGALG00000023933	G0S2	26	3140221	3141106	1.34389	1e-05	3.77e-05	down	70	56	52	52	35	17	30	57	79	157	58	134	76	70	ENSGALG00000038405	1	76721272	76762823
ENSGALG00000030034	G6PC	27	5507166	5509834	1.22652	1.05e-05	3.93e-05	down	37	14	19	20	26	23	29	74	39	52	39	41	34	29	ENSGALG00000007744	20	12201193	12217115
ENSGALG00000008408	GAB3	4	14308087	14323430	1.87057	5.09e-24	3.54e-22	up	197	134	155	196	163	115	179	36	27	26	51	49	34	25	ENSGALG00000014682	Z	57020390	57079744
ENSGALG00000013200	GABBR2	2	88215971	88673271	3.28215	9.13e-05	0.000289345	up	24	7	31	12	14	0	9	0	0	3	0	2	1	2	ENSGALG00000007964	15	10909705	10913466
ENSGALG00000014202	GABRA4	4	67356760	67392287	1.95963	0.00138507	0.00350423	up	4	10	8	8	12	14	6	1	0	1	0	6	2	3	ENSGALG00000036742	19	2515845	2605834
ENSGALG00000016744	GABRA5	1	131309060	131362547	3.42959	0.000197731	0.000588329	up	9	7	6	3	6	3	7	0	0	1	0	0	0	2	ENSGALG00000002888	21	3822317	3944648
ENSGALG00000001690	GABRB2	13	7347873	7480663	1.25267	0.0169747	0.0337578	up	8	9	9	4	17	9	9	1	7	5	3	4	2	0	ENSGALG00000030187	5	18664583	18683297
ENSGALG00000029392	GABRB3	1	131393723	131503806	2.33809	0.000174159	0.000523239	up	7	3	12	14	8	8	11	1	3	0	2	3	1	0	ENSGALG00000034150	2	4018778	4019952
ENSGALG00000020143	GABRG1	4	67576491	67624911	2.78409	0.0255604	0.0486974	up	1	0	3	4	1	1	5	0	1	0	0	0	0	0	ENSGALG00000027490	2	4022675	4023803
ENSGALG00000034070	GAD1	7	18286593	18311186	1.61414	0.00106445	0.00275467	up	23	12	42	22	21	13	6	1	3	4	10	11	5	3	ENSGALG00000027973	2	4024913	4026402
ENSGALG00000025977	GADD45A	8	28789111	28790623	1.04739	2.25e-14	3.4e-13	down	862	933	965	1044	1078	1180	1077	1308	1449	2305	1656	1513	1694	1790	ENSGALG00000019696	2	4020689	4022467
ENSGALG00000029968	GADD45B	28	3324494	3327985	1.41413	8.95e-24	6.11e-22	down	375	353	355	464	461	518	444	1035	1018	783	868	872	1016	678	ENSGALG00000045119	7	22679698	22681613
ENSGALG00000015352	GAK	Z	53372518	53437529	2.52406	1.56e-18	4.49e-17	up	1029	718	320	258	361	514	558	54	58	49	84	127	60	98	ENSGALG00000037744	26	251343	280200
ENSGALG00000007047	GAL	5	16598913	16606875	1.43115	1.66e-10	1.36e-09	down	138	93	213	234	354	169	233	460	496	453	410	515	393	349	ENSGALG00000043287	1	25060566	25074918
ENSGALG00000006354	GAL3ST2	9	4749643	4754097	4.29591	2.36e-06	9.86e-06	up	21	13	24	52	1142	379	528	2	8	17	9	32	7	16	ENSGALG00000033295	1	25079044	25090122
ENSGALG00000010593	GALC	5	42900089	42935408	1.99868	1.71e-11	1.63e-10	up	529	670	316	309	315	435	647	46	63	75	97	237	66	77	ENSGALG00000008351	12	19314648	19318095
ENSGALG00000004033	GALNT10	13	12161431	12237553	1.44646	2.76e-07	1.35e-06	up	200	205	103	119	176	137	235	36	43	16	70	94	34	58	ENSGALG00000003261	27	5335537	5350085
ENSGALG00000013197	GALNT12	2	88163640	88207592	1.49057	2.25e-05	7.98e-05	up	1535	1831	880	1011	897	1616	1825	132	375	106	558	969	349	340	ENSGALG00000026452	2	89047705	89061333
ENSGALG00000009078	GALNT14	3	7780875	7845223	1.31642	0.000484766	0.00134084	down	15	25	25	26	18	30	17	51	41	106	34	20	20	31	ENSGALG00000003096	20	2284256	2334193
ENSGALG00000001130	GALNT17	19	1074003	1259228	1.68402	1.19e-08	7.27e-08	up	110	33	65	132	120	136	123	14	19	25	33	27	21	40	ENSGALG00000032410	11	18767309	18788285
ENSGALG00000011106	GALNT2	3	40338166	40430496	1.43062	1.37e-10	1.14e-09	up	536	623	382	414	386	404	466	92	99	64	187	238	154	131	ENSGALG00000003169	11	2404978	2447419
ENSGALG00000002242	GALNT9	15	2356780	2473501	2.27054	7.21e-11	6.26e-10	up	83	84	58	103	63	25	57	5	8	8	15	26	11	6	ENSGALG00000029077	24	4225268	4255878
ENSGALG00000003425	GALR1L	11	3528455	3543639	2.80742	0.00117752	0.00302337	up	12	10	6	3	9	11	1	1	0	0	0	0	1	4	ENSGALG00000015351	1	86647126	86769237
ENSGALG00000040182	GAMT	28	3195794	3199323	1.22156	1.28e-06	5.6e-06	down	14	16	13	17	17	16	16	24	23	45	19	33	30	28	ENSGALG00000038981	1	14822529	14828989
ENSGALG00000015181	GAREM1	2	106747799	106844648	1.07778	1.65e-05	5.97e-05	up	189	211	141	114	187	195	270	56	72	35	107	128	48	57	ENSGALG00000042664	11	7161486	7163937
ENSGALG00000032452	GAS7	18	230967	334718	1.20816	1.45e-12	1.65e-11	up	294	203	160	213	299	254	370	81	80	89	94	109	83	82	ENSGALG00000028682	2	92943205	92948715
ENSGALG00000000540	GAS8	11	19097873	19105088	1.06963	9.12e-08	4.81e-07	down	249	209	221	303	255	231	252	587	380	563	351	278	293	367	ENSGALG00000030821	20	12317569	12322110
ENSGALG00000011859	GBE	1	49180327	49185207	2.21654	0.000147529	0.000449657	down	4	3	3	3	3	0	2	7	9	22	8	5	2	13	ENSGALG00000016027	1	106570974	106577329
ENSGALG00000016806	GCC2	1	136270022	136292419	1.0126	7.92e-06	3.03e-05	up	1832	1566	907	709	1032	946	1297	357	376	248	594	674	505	564	ENSGALG00000009714	4	25756022	25763028
ENSGALG00000034917	GCDH	30	21530	24611	1.30883	1.66e-10	1.36e-09	down	224	253	291	392	343	234	278	574	796	833	455	440	378	465	ENSGALG00000010147	Z	25696472	25715104
ENSGALG00000011104	GCG	7	21233409	21245324	1.11842	0.014993	0.0302063	down	56	26	67	65	287	79	39	58	262	51	190	226	114	213	ENSGALG00000033926	27	4168580	4176543
ENSGALG00000011219	GCGR	18	9997747	10000701	1.29868	0.000554582	0.00151919	down	13	10	9	9	8	9	10	17	16	30	9	40	14	8	ENSGALG00000023338	18	9721862	9729512
ENSGALG00000012773	GCNT2	2	63466809	63472739	2.33343	0.0187754	0.0369577	up	9	1	11	9	1	0	7	1	1	0	1	0	0	3	ENSGALG00000011038	2	32252636	32265780
ENSGALG00000044940	GCNT3	10	5342425	5343714	1.22584	0.0236693	0.045483	up	198	282	235	40	127	170	456	38	62	37	42	26	89	227	ENSGALG00000035911	18	9694212	9698056
ENSGALG00000015141	GDA	Z	35677318	35702153	1.987	8.01e-07	3.64e-06	up	1450	942	299	182	281	382	474	72	82	58	139	246	120	108	ENSGALG00000036856	33	1153495	1155340
ENSGALG00000042798	GDAP1	2	118637735	118644214	1.05172	0.0182656	0.0360308	up	10	14	31	49	33	24	13	1	7	9	15	7	16	12	ENSGALG00000036867	1	50804456	50812317
ENSGALG00000004309	GDAP1L1	20	5623729	5634690	1.19201	2.64e-05	9.23e-05	down	28	12	37	54	59	43	25	65	40	56	85	83	59	83	ENSGALG00000041236	1	50786846	50795719
ENSGALG00000005981	GDF2	6	18011390	18014610	1.41811	1.7e-09	1.19e-08	down	78	85	79	119	78	74	74	177	224	290	101	111	145	185	ENSGALG00000026548	18	9712425	9718458
ENSGALG00000000909	GFAP	27	1466576	1470293	2.0691	4.95e-06	1.96e-05	down	9	8	9	13	8	7	5	65	12	46	16	21	14	16	ENSGALG00000012218	1	50881482	50883895
ENSGALG00000003478	GFI1B	17	7228969	7237845	1.77053	1.75e-06	7.45e-06	up	41	50	52	43	44	11	36	3	5	12	7	15	15	8	ENSGALG00000010619	8	24425612	24454376
ENSGALG00000012730	GFOD1	2	62337049	62400206	2.11751	3.21e-11	2.93e-10	up	78	57	59	47	45	41	56	3	11	7	12	26	4	9	ENSGALG00000014514	4	77261661	77306093
ENSGALG00000009173	GFRA1	6	28641077	28776861	1.08186	3.23e-06	1.31e-05	up	117	98	101	90	133	115	185	42	44	27	73	29	39	62	ENSGALG00000027051	19	4787699	4789411
ENSGALG00000032856	GFRA2	22	1423301	1444213	1.00179	1.62e-05	5.86e-05	down	142	101	132	263	223	272	201	444	311	310	246	264	234	291	ENSGALG00000004108	6	10735972	10754924
ENSGALG00000007620	GFRA3	13	18211398	18219351	1.47889	0.00036587	0.00103345	up	543	422	250	197	270	366	585	22	67	24	146	271	101	153	ENSGALG00000027785	Z	9303649	9323534
ENSGALG00000036589	GFRA4	4	89905279	89970771	1.09969	4.21e-06	1.68e-05	up	112	76	101	83	110	91	92	33	25	30	54	61	31	15	ENSGALG00000029999	11	595597	599683
ENSGALG00000016296	GFRAL	3	87894493	87908044	1.12193	0.00235298	0.00569087	up	15	29	15	17	26	23	14	1	6	4	8	13	8	12	ENSGALG00000045092	Z	78821219	78829951
ENSGALG00000039658	GGA1	1	51230967	51239478	1.39514	1.53e-21	6.99e-20	up	1259	1221	854	933	1194	989	1062	243	260	237	390	464	302	408	ENSGALG00000005784	15	7752481	7757835
ENSGALG00000031130	GGH	2	114191667	114202829	3.13043	2.71e-30	4.22e-28	up	961	793	641	516	755	671	926	27	64	57	62	173	38	74	ENSGALG00000005487	2	3843130	3876922
ENSGALG00000040504	GGT5	15	8402897	8419021	2.31127	1.01e-76	9.35e-73	up	627	657	606	654	618	566	510	64	106	111	95	104	119	83	ENSGALG00000016968	1	167167013	167175727
ENSGALG00000014855	GHR	Z	13428436	13558478	1.39049	2.62e-06	1.09e-05	up	35	27	26	20	42	32	30	10	13	4	11	14	8	5	ENSGALG00000030992	28	3353320	3360073
ENSGALG00000008411	GHRL	12	19487356	19490057	1.21222	0.000100691	0.000316436	down	14	16	13	10	11	22	8	30	18	18	37	15	29	26	ENSGALG00000015572	Z	64147420	64159797
ENSGALG00000040844	GIT2	15	6912286	6935598	1.27646	3.09e-27	3.25e-25	up	1705	1532	1540	1577	1290	994	1326	381	475	544	455	532	442	449	ENSGALG00000010976	2	31367245	31379611
ENSGALG00000014873	GJA1	3	61930601	61938188	1.35349	4.12e-29	5.45e-27	up	1295	1009	1591	1714	1265	1122	1265	337	400	391	466	529	335	445	ENSGALG00000034628	2	85957248	85961486
ENSGALG00000017137	GJA3	1	179008069	179009604	1.31268	0.0110034	0.0229144	up	8	3	7	9	9	6	11	2	4	1	4	1	2	3	ENSGALG00000011918	1	49545405	49549775
ENSGALG00000039452	GJA5	1	92426541	92445689	1.17773	9.52e-05	0.000300596	up	32	21	28	26	40	35	48	18	13	6	17	12	5	10	ENSGALG00000004505	18	9231377	9233096
ENSGALG00000022720	GJB2	1	178991001	178991678	1.50792	0.0162935	0.0325114	up	45	117	12	26	22	32	59	0	2	4	19	36	19	11	ENSGALG00000044814	7	27529907	27538194
ENSGALG00000013293	GLDN	10	9240919	9255900	1.20553	0.0253919	0.0484113	down	6	6	0	3	3	8	6	13	11	2	14	9	3	7	ENSGALG00000042463	KQ759550.1	13072	16897
ENSGALG00000039818	GLG1	11	1864846	1920332	1.15807	6.01e-13	7.29e-12	up	2210	2253	1602	1648	1752	1705	2202	492	666	423	774	1147	663	688	ENSGALG00000012555	7	36504354	36539562
ENSGALG00000010781	GLRA3	4	44143782	44216360	2.21389	5e-06	1.97e-05	up	14	22	10	11	16	11	14	1	2	2	4	2	0	6	ENSGALG00000014391	4	74104406	74153401
ENSGALG00000012208	GMFB	5	56581956	56591468	1.63382	7.46e-20	2.7e-18	up	2130	1442	1408	1400	1123	879	1266	254	299	371	393	549	286	345	ENSGALG00000044002	24	4258271	4261105
ENSGALG00000012705	GMPR	2	61726455	61761538	1.19258	2.38e-06	9.96e-06	up	1537	1645	1135	968	1074	1573	1782	321	425	171	641	908	497	506	ENSGALG00000007907	15	10875974	10885281
ENSGALG00000004368	GNA12	14	3384941	3387376	1.91244	1.19e-15	2.2e-14	up	134	101	102	99	89	79	152	13	18	15	29	47	21	19	ENSGALG00000010151	3	30233535	30241891
ENSGALG00000036028	GNA13	18	7826567	7849764	2.00104	7.89e-18	2.07e-16	up	733	578	374	386	409	367	602	51	89	67	118	194	90	91	ENSGALG00000012971	3	49060310	49101357
ENSGALG00000008427	GNAT3	1	11261662	11291903	1.06172	0.00445692	0.0101569	up	13	18	15	25	33	14	42	8	14	11	9	11	4	4	ENSGALG00000015103	Z	31978209	32141309
ENSGALG00000008983	GNB4	9	17532633	17554585	2.7527	1.73e-28	2.12e-26	up	804	720	555	581	577	405	571	24	74	43	87	146	67	70	ENSGALG00000009182	6	28798660	28817497
ENSGALG00000029899	GNG11	2	23338682	23340713	1.1421	3.54e-08	1.99e-07	down	59	52	61	119	69	62	49	112	138	152	127	88	97	106	ENSGALG00000006459	12	11270120	11281464
ENSGALG00000010986	GNG4	3	38148554	38161698	1.20881	0.000135232	0.000414979	down	38	24	39	61	37	41	39	85	76	137	71	28	38	67	ENSGALG00000005889	8	13985788	14013189
ENSGALG00000031980	GNG7	28	3319785	3320799	1.13549	2.63e-09	1.78e-08	up	581	543	556	589	605	577	667	165	237	93	229	395	173	234	ENSGALG00000015221	1	83669942	83676311
ENSGALG00000043290	GNMT	3	16042158	16043828	1.08781	1.7e-07	8.62e-07	down	90	88	110	153	206	125	144	307	251	208	195	234	163	183	ENSGALG00000008956	6	27706900	27723967
ENSGALG00000041494	GOLGB1	1	34200	67146	1.34834	3.11e-14	4.61e-13	up	1717	1867	1228	1248	1309	1826	1919	344	498	312	649	791	429	518	ENSGALG00000012095	5	55629271	55635045
ENSGALG00000012601	GOLM1	Z	40767154	40792722	2.69394	2.17e-14	3.28e-13	up	3063	2990	1214	799	973	1877	1629	106	182	91	194	510	299	212	ENSGALG00000016586	3	105618975	105629866
ENSGALG00000021529	GP1BB	15	782851	785096	1.19795	5.67e-09	3.64e-08	down	56	54	67	137	74	84	88	145	131	179	183	118	123	132	ENSGALG00000013834	3	54351198	54356568
ENSGALG00000045125	GP5	9	12927568	12929496	1.04725	2.98e-06	1.23e-05	down	31	79	30	51	40	46	34	76	94	77	71	73	66	55	ENSGALG00000003241	23	5179384	5181209
ENSGALG00000040899	GPAT2	AADN04000662.1	51485	60326	1.13394	1.64e-08	9.8e-08	down	54	52	47	73	87	72	77	133	127	131	127	78	76	130	ENSGALG00000030140	1	6627009	6665964
ENSGALG00000010350	GPATCH2L	5	38603361	38633448	1.75379	1.51e-12	1.72e-11	up	160	126	86	95	111	109	142	9	28	15	45	40	27	35	ENSGALG00000007042	18	9647197	9654965
ENSGALG00000011481	GPD1L	2	40461464	40484023	1.83589	4.35e-22	2.21e-20	up	557	456	388	426	450	409	550	52	88	75	128	188	84	121	ENSGALG00000043975	18	1973278	1976621
ENSGALG00000008589	GPR1	7	12620689	12621741	1.16877	4.7e-07	2.22e-06	up	196	116	124	175	227	193	312	44	74	72	92	50	50	94	ENSGALG00000001022	27	1391412	1399208
ENSGALG00000012401	GPR137C	5	58316698	58329806	1.02606	3.01e-10	2.34e-09	up	99	74	96	88	92	67	79	33	31	35	27	41	37	29	ENSGALG00000000564	27	2980911	2989606
ENSGALG00000032363	GPR141	2	46412221	46429402	1.54501	0.000132415	0.000406943	up	41	49	20	36	38	20	24	1	10	12	9	2	16	12	ENSGALG00000020813	9	13705897	13741849
ENSGALG00000002473	GPR157	21	3250804	3257577	1.03584	1.25e-07	6.46e-07	down	363	556	427	478	383	547	630	686	772	457	1184	1178	728	583	ENSGALG00000014413	1	76787499	76796808
ENSGALG00000007667	GPR158	2	16497663	16678504	1.37824	2.51e-05	8.82e-05	up	37	35	40	37	52	23	27	6	2	16	13	10	12	18	ENSGALG00000028648	1	40702586	40708882
ENSGALG00000004111	GPR174	4	1468241	1474098	1.32916	8.83e-05	0.000280448	up	372	277	358	468	189	126	139	41	81	102	31	101	140	115	ENSGALG00000003165	6	9099466	9144569
ENSGALG00000022750	GPR18	1	144625392	144630634	1.58282	1.12e-06	4.96e-06	up	277	203	241	297	151	60	106	26	33	64	35	62	74	60	ENSGALG00000046262	15	9719205	9743172
ENSGALG00000016881	GPR183	1	144596844	144597920	1.56506	1.9e-11	1.8e-10	up	254	218	169	239	163	106	121	39	39	60	30	53	67	52	ENSGALG00000006714	9	3427461	3430996
ENSGALG00000041730	GPR20	2	146276982	146300578	1.14285	6.93e-09	4.39e-08	down	87	97	93	134	126	157	155	267	215	243	255	184	162	152	ENSGALG00000044894	15	6075725	6081508
ENSGALG00000000607	GPR37L1	26	339133	343258	1.13949	3.08e-07	1.49e-06	down	97	47	62	114	92	120	96	188	164	170	209	145	107	109	ENSGALG00000030917	KQ759553.1	9651	14630
ENSGALG00000005544	GPR55	9	5355453	5356370	3.03556	3.16e-10	2.45e-09	up	69	77	42	67	35	28	24	1	1	15	2	6	3	5	ENSGALG00000005450	12	8379726	8395484
ENSGALG00000015570	GPR63	3	72975134	72976393	1.66914	4.57e-18	1.23e-16	up	96	80	76	88	115	86	123	12	22	27	21	32	29	24	ENSGALG00000006787	12	11563987	11565186
ENSGALG00000010595	GPR65	5	42943760	42944791	2.11322	1.96e-13	2.54e-12	up	341	361	335	360	234	109	181	20	59	55	34	51	76	60	ENSGALG00000012103	5	5540164	5584404
ENSGALG00000010707	GPR68	5	44279689	44280792	1.81595	3.33e-13	4.2e-12	up	53	89	53	83	72	73	79	11	12	17	25	12	9	28	ENSGALG00000012987	1	60351125	60361329
ENSGALG00000008165	GPR75	3	3016356	3017966	1.33077	1.26e-14	2e-13	up	134	190	121	149	111	112	130	34	43	33	41	67	34	51	ENSGALG00000015193	1	83535298	83558902
ENSGALG00000017212	GPR83	1	185714669	185717617	1.41234	0.00769129	0.0166346	down	5	2	5	4	3	3	2	3	7	15	5	12	7	2	ENSGALG00000013247	1	190389807	190403692
ENSGALG00000002028	GPRC5B	14	14648509	14655477	1.02241	4.09e-05	0.000138228	up	54	40	33	58	46	59	93	29	15	17	21	22	21	24	ENSGALG00000007689	24	5630121	5633751
ENSGALG00000002048	GPRIN2	6	2740219	2743202	1.15758	0.00784316	0.0169315	down	116	43	54	64	50	94	107	281	84	31	135	29	153	198	ENSGALG00000043080	3	387087	449320
ENSGALG00000025851	GPRIN3	4	35514864	35517104	2.29058	5.96e-42	4.79e-39	up	267	261	195	200	207	159	199	31	27	38	27	48	36	36	ENSGALG00000036935	AADN04000990.1	19914	21799
ENSGALG00000033338	GPT2	11	7859581	7880632	1.34884	8.53e-05	0.00027169	up	1544	827	470	446	603	1224	950	134	357	67	311	488	313	282	ENSGALG00000043587	3	69107	140717
ENSGALG00000004521	GPX3	13	13057890	13059882	1.11419	1.96e-09	1.35e-08	down	5637	5517	6588	8286	9559	7898	8913	15276	15000	16523	11173	8788	10534	11927	ENSGALG00000040156	5	44306591	44389396
ENSGALG00000005094	GRAP	14	5192894	5196760	1.37036	0.000393805	0.00110712	up	818	670	922	1214	415	184	312	66	163	267	79	289	289	248	ENSGALG00000037520	1	190326655	190327658
ENSGALG00000008016	GRB2	18	10837848	10875742	1.67207	9.43e-15	1.53e-13	up	2328	2098	1606	1702	1759	1674	2312	240	442	248	628	882	456	554	ENSGALG00000037072	1	189212790	189221034
ENSGALG00000009724	GREM1	5	30579487	30580185	1.79067	6.27e-45	8.93e-42	up	1128	1000	1247	1563	1148	1152	1237	237	246	211	321	411	219	324	ENSGALG00000031666	1	72655626	72839254
ENSGALG00000010773	GREM2	3	36304884	36305390	1.20594	6.27e-07	2.89e-06	up	71	59	102	153	131	130	139	27	39	23	31	54	52	47	ENSGALG00000003146	15	4884285	4896278
ENSGALG00000037687	GRHL2	2	129435468	129485773	1.58086	8.84e-05	0.000280957	up	114	120	61	68	111	92	201	17	20	4	38	79	33	19	ENSGALG00000012129	7	29030066	29062387
ENSGALG00000006638	GRIK4	24	3593270	3711248	1.12787	0.000563445	0.00154073	down	68	50	63	79	73	69	54	151	79	234	120	51	48	90	ENSGALG00000032223	AADN04001188.1	19984	23374
ENSGALG00000026241	GRIN3B	28	2909715	2914206	1.45601	8.4e-10	6.1e-09	down	347	337	351	604	600	634	693	1017	1265	1447	1443	568	805	1166	ENSGALG00000029788	2	43988980	43993653
ENSGALG00000037097	GRK3	15	7052925	7093489	1.18422	6.14e-07	2.84e-06	up	1053	988	949	1263	697	464	570	200	292	503	215	316	275	283	ENSGALG00000030801	4	73695610	73702467
ENSGALG00000002800	GRK7	9	10271683	10289497	1.37504	4.13e-10	3.15e-09	down	15	25	24	34	25	22	24	56	74	49	44	40	44	41	ENSGALG00000039837	1	194457115	194459494
ENSGALG00000003839	GRM2	12	2896123	2901591	1.00699	0.000292426	0.000841929	down	99	65	124	60	121	122	84	96	155	97	338	136	145	128	ENSGALG00000002329	19	4765354	4766571
ENSGALG00000040959	GRP	Z	912007	916668	1.515	0.000665783	0.00179307	down	5	6	2	8	2	11	6	11	13	22	13	4	11	16	ENSGALG00000024466	11	841974	843199
ENSGALG00000002673	GRPEL2	13	8517217	8519938	1.45839	5.82e-12	6.05e-11	up	191	179	140	148	131	206	213	32	47	36	69	72	26	74	ENSGALG00000028256	Z	8363765	8366761
ENSGALG00000010974	GSC	5	45795960	45797259	2.06676	0.00642677	0.0141343	down	1	0	2	0	5	1	2	10	3	3	1	12	4	4	ENSGALG00000003003	9	9539782	9541879
ENSGALG00000029395	GSTM3	AADN04006791.1	2137	8893	1.05731	2.38e-11	2.23e-10	down	1712	2147	2171	2700	2556	3141	2294	4651	4103	4475	4284	3262	3317	3429	ENSGALG00000032717	19	382462	383326
ENSGALG00000006344	GSTT1	15	8155554	8165509	1.0429	6.76e-07	3.1e-06	up	108	130	95	80	99	81	57	24	29	39	47	42	39	33	ENSGALG00000034478	19	389572	391141
ENSGALG00000026747	GTF2A1L	3	7644760	7656111	1.64259	0.0169691	0.0337504	down	4	0	1	4	5	0	2	6	1	8	2	7	10	5	ENSGALG00000043603	19	395344	396508
ENSGALG00000042320	GTF2E1	1	79717852	79762511	1.27499	8.53e-13	1.01e-11	up	499	575	475	382	355	557	527	108	125	115	160	269	164	188	ENSGALG00000024470	19	4763267	4764359
ENSGALG00000017173	GUCY1A2	1	180825307	180952539	1.50306	1e-06	4.49e-06	up	32	23	43	47	29	43	71	18	10	14	9	12	10	7	ENSGALG00000034987	19	370698	371713
ENSGALG00000007804	GXYLT2	12	16533598	16551037	1.29625	1.11e-15	2.07e-14	up	357	238	287	413	333	347	498	91	117	89	161	138	89	120	ENSGALG00000005612	2	4048632	4072393
ENSGALG00000011566	GYPC	7	24152194	24178854	1.22802	1.77e-08	1.05e-07	up	132	82	93	109	131	167	216	31	62	46	46	54	38	41	ENSGALG00000006479	20	10302775	10305878
ENSGALG00000027315	H2A-VII	1	48199800	48200189	1.80143	7.01e-05	0.000226582	down	7	6	5	5	4	7	4	21	20	13	24	5	17	4	ENSGALG00000017052	1	172568581	172574262
ENSGALG00000002492	H6PD	21	3292836	3298662	2.42177	7.55e-10	5.51e-09	up	289	391	148	115	192	172	331	22	14	12	42	105	30	27	ENSGALG00000011881	4	54290252	54295395
ENSGALG00000035104	HAND1	13	12134077	12135178	2.37096	1.08e-19	3.77e-18	down	58	96	106	135	131	181	145	775	577	589	349	383	449	331	ENSGALG00000004161	10	6752260	6759377
ENSGALG00000030530	HAND2	4	43676569	43677709	1.63774	6.24e-12	6.43e-11	down	380	361	604	696	536	637	688	1797	1124	2247	1036	1109	865	1321	ENSGALG00000025810	4	1848475	1851728
ENSGALG00000008845	HAO1	3	14662073	14688684	1.35002	0.000211642	0.000625896	down	11	8	4	9	4	10	9	19	9	18	9	24	21	11	ENSGALG00000015471	3	71627448	71645299
ENSGALG00000015627	HAPLN1	Z	62521046	62613868	3.09709	2.85e-10	2.23e-09	up	23	19	12	19	20	47	31	1	3	4	3	2	1	2	ENSGALG00000007555	5	17525970	17539612
ENSGALG00000013234	HAPLN2	25	1487086	1489777	1.15062	4.91e-08	2.7e-07	down	38	56	59	71	47	72	51	127	127	97	102	72	98	68	ENSGALG00000017283	1	73241231	73282113
ENSGALG00000029596	HAS2	2	137467301	137485205	1.95352	2.76e-22	1.45e-20	up	202	150	140	156	154	169	247	19	35	29	58	29	40	41	ENSGALG00000003485	26	5031084	5043504
ENSGALG00000017362	HAVCR1	13	11459253	11468309	1.37004	3.18e-08	1.8e-07	up	807	668	718	650	620	180	458	126	185	138	151	237	212	226	ENSGALG00000004837	20	6899289	6906498
ENSGALG00000043234	HBA1	14	12163617	12164434	1.31319	3.68e-05	0.00012539	down	3308	303	468	357	183	157	434	1378	719	712	487	566	382	559	ENSGALG00000004494	11	8570363	8582718
ENSGALG00000031597	HBM	14	12160597	12161521	1.05456	0.000483119	0.00133708	down	1396	117	161	125	73	58	175	381	248	200	132	227	110	171	ENSGALG00000040794	2	126933818	127051805
ENSGALG00000039682	HCLS1	1	70097	82102	2.24225	1.78e-14	2.74e-13	up	747	661	642	995	377	205	315	61	72	126	70	123	97	113	ENSGALG00000038502	14	14290195	14299794
ENSGALG00000010854	HDAC9	2	29159908	29606221	1.38677	5.57e-16	1.09e-14	up	463	362	367	492	358	284	358	106	90	113	108	204	77	126	ENSGALG00000001718	13	6735705	6741308
ENSGALG00000013026	HDHD5	1	61716796	61721741	1.65328	3.45e-10	2.67e-09	up	245	315	191	156	233	238	324	22	53	37	70	126	63	72	ENSGALG00000010347	4	35277597	35281300
ENSGALG00000005823	HDLBP	9	4941057	4961123	1.01181	3.15e-15	5.47e-14	up	15630	15849	11724	13330	12991	14321	14675	4348	5278	3758	6244	8527	5514	5775	ENSGALG00000015641	Z	60998292	61007184
ENSGALG00000013824	HECA	3	54208130	54231058	2.20634	1.28e-25	1.11e-23	up	642	473	351	398	404	355	578	61	63	53	85	161	63	75	ENSGALG00000011457	4	49964591	49978039
ENSGALG00000038043	HECTD2	6	19794881	19823165	1.23956	4.89e-10	3.69e-09	down	152	184	232	199	194	264	316	497	376	543	456	308	319	366	ENSGALG00000006955	6	21030538	21037067
ENSGALG00000011813	HEG1	7	28102696	28133209	1.72266	6.84e-30	1.01e-27	up	421	339	270	277	403	402	487	79	83	75	107	100	81	105	ENSGALG00000040152	13	7850953	7868929
ENSGALG00000039356	HEPACAM	24	241131	243316	1.01372	0.000522735	0.00143834	down	20	15	33	50	43	31	39	76	47	71	60	41	31	39	ENSGALG00000011138	5	48083436	48096133
ENSGALG00000037410	HEPH	4	284344	322060	1.17161	4.8e-05	0.000159925	up	3317	2700	1305	1152	1706	1669	2768	346	631	340	1011	1325	747	895	ENSGALG00000009699	9	22871187	22883043
ENSGALG00000001220	HERPUD1	11	661331	665530	1.14484	4.4e-08	2.44e-07	up	739	686	663	935	1109	480	452	145	249	263	266	296	352	260	ENSGALG00000001551	21	2206856	2219935
ENSGALG00000028015	HES1	9	12963817	12974386	1.16526	1.01e-13	1.37e-12	down	216	295	309	362	319	320	344	675	540	623	486	476	394	649	ENSGALG00000028595	Z	16730624	16731687
ENSGALG00000005506	HESX1	12	8600981	8610235	1.12158	2.68e-14	4.01e-13	down	65	59	71	67	63	71	78	103	161	91	111	97	124	137	ENSGALG00000034437	KQ759585.1	21	5787
ENSGALG00000041926	HEXIM1	27	1524105	1525254	1.12835	1.68e-18	4.82e-17	down	1052	1310	1402	1806	1577	1275	1148	2439	2379	2664	2171	2167	2233	2532	ENSGALG00000012207	7	30610000	30632948
ENSGALG00000014966	HGD	1	79795007	79813272	1.10202	0.0251969	0.048089	down	3	2	4	4	2	6	4	9	4	4	5	12	4	5	ENSGALG00000007076	2	12867236	12980731
ENSGALG00000033974	HGF	1	10650557	10710329	1.1106	0.000277858	0.000802861	up	37	29	20	27	40	45	34	10	11	13	22	9	4	17	ENSGALG00000006925	14	8573049	8587904
ENSGALG00000009948	HHIP	4	31100895	31177614	1.24061	3.08e-15	5.36e-14	up	733	1097	1122	771	889	1237	1194	286	460	267	401	345	277	366	ENSGALG00000004387	10	7931180	7968970
ENSGALG00000007808	HID1	18	10666166	10688098	1.15131	3.35e-11	3.05e-10	up	1091	981	736	744	982	1041	1442	281	319	230	434	550	333	402	ENSGALG00000028519	27	5421912	5425308
ENSGALG00000005698	HIF1AN	6	17408516	17416044	1.305	2.47e-11	2.29e-10	up	466	453	320	342	344	404	441	69	146	65	158	199	147	125	ENSGALG00000011733	2	42849468	42850532
ENSGALG00000027418	HINT2	Z	9092468	9094041	1.04734	1.28e-05	4.73e-05	down	122	168	85	80	102	69	80	132	202	241	180	197	114	100	ENSGALG00000039146	2	44567230	44568383
ENSGALG00000001939	HIPK1	26	3778341	3797526	2.36463	6.14e-30	9.16e-28	up	1946	1901	1246	1121	1453	1199	1876	144	182	180	261	463	214	251	ENSGALG00000037077	2	42832406	42838099
ENSGALG00000031159	HIST1H110	1	48127672	48128582	1.22295	2.04e-12	2.27e-11	down	225	184	187	213	181	192	320	324	511	338	490	583	291	278	ENSGALG00000011418	3	42599910	42601090
ENSGALG00000039722	HIST1H2B7	1	48095494	48095874	1.08539	0.00304416	0.00720346	down	21	9	11	11	3	12	11	26	27	15	18	20	18	7	ENSGALG00000035733	27	4891171	4899901
ENSGALG00000030567	HIST1H2B8	1	48111297	48111790	1.09002	0.000868823	0.00229246	down	16	15	15	10	8	17	22	21	26	12	49	21	29	17	ENSGALG00000038069	2	44531020	44534335
ENSGALG00000027365	HIVEP3	23	863801	918759	1.14302	1.26e-06	5.54e-06	up	642	579	566	580	423	242	338	147	170	260	96	197	182	157	ENSGALG00000011734	2	42869123	42870256
ENSGALG00000016047	HLCS	1	106864786	106977050	2.57549	1.78e-23	1.14e-21	up	489	384	316	276	289	250	328	22	29	26	53	101	44	44	ENSGALG00000011808	2	42945010	42946158
ENSGALG00000037257	HLX	3	18604471	18611048	1.5839	2.41e-09	1.64e-08	down	111	116	145	203	214	176	170	504	331	634	435	229	201	323	ENSGALG00000011084	3	40119670	40122732
ENSGALG00000009875	HMGA2	1	34203987	34308540	1.63787	1.28e-08	7.76e-08	up	228	233	169	164	174	187	268	24	32	18	64	111	66	58	ENSGALG00000037682	6	966398	1018487
ENSGALG00000028602	HMP19	13	9493414	9530196	1.02194	1.19e-06	5.24e-06	down	230	190	246	270	425	354	290	674	429	357	572	385	369	434	ENSGALG00000009975	1	35503971	35515953
ENSGALG00000042621	HNF4G	2	119132532	119162556	1.92257	3.3e-09	2.2e-08	up	1556	1765	1051	1072	1479	1346	1827	117	245	88	410	770	262	314	ENSGALG00000039205	25	33889	44203
ENSGALG00000010889	HOOK1	8	26728370	26751231	1.27123	1.77e-17	4.43e-16	up	666	608	544	437	551	563	679	154	171	144	204	317	155	211	ENSGALG00000008812	3	15346088	15352736
ENSGALG00000015390	HOOK3	Z	53692536	53759256	1.16693	2.87e-09	1.93e-08	up	297	209	142	136	237	259	158	59	74	79	65	76	75	85	ENSGALG00000013041	2	78640518	78648554
ENSGALG00000040521	HOXA2	2	32640373	32642224	1.63576	1.12e-10	9.46e-10	down	101	155	148	143	155	84	103	353	284	542	281	162	246	295	ENSGALG00000002448	19	4871788	4878028
ENSGALG00000022622	HOXA4	2	32666501	32690449	1.36296	4.18e-11	3.76e-10	down	227	435	420	461	379	313	282	769	848	1081	614	532	650	612	ENSGALG00000016088	4	90271990	90282062
ENSGALG00000028983	HOXA9	2	32700853	32703521	1.09512	2.12e-13	2.74e-12	down	586	902	726	678	600	675	676	1064	1275	1649	1054	1045	1021	1108	ENSGALG00000015821	1	104009937	104020977
ENSGALG00000025774	HOXB2	27	3869146	3871830	1.56388	2.36e-11	2.2e-10	down	33	52	47	70	91	71	68	150	149	193	157	91	102	168	ENSGALG00000003458	14	1005408	1019260
ENSGALG00000043219	HOXB3	27	3861027	3863525	1.70113	1.17e-11	1.15e-10	down	26	27	41	34	56	50	52	112	98	168	98	68	84	105	ENSGALG00000015910	3	81650139	81729852
ENSGALG00000034907	HOXB5	27	3818138	3820558	1.12156	6.98e-10	5.12e-09	down	242	266	337	323	301	206	196	505	370	655	395	413	408	468	ENSGALG00000039140	13	954498	955895
ENSGALG00000032740	HOXB7	27	3799423	3803477	1.28595	4.37e-12	4.62e-11	down	114	135	153	165	159	117	148	313	226	408	231	209	237	275	ENSGALG00000006856	5	15676801	15708216
ENSGALG00000001276	HOXB9	27	3782436	3786433	1.39563	9.67e-12	9.65e-11	up	401	479	339	356	314	288	348	58	111	64	95	201	111	142	ENSGALG00000041752	23	1969662	1975770
ENSGALG00000029393	HOXC10	33	1019070	1023653	3.86601	0.000208578	0.000617624	down	0	0	0	0	2	0	0	1	10	3	2	5	4	2	ENSGALG00000023411	Z	21298861	21305055
ENSGALG00000035539	HOXC4	33	1094752	1096547	1.2665	0.00109303	0.00282208	down	6	3	14	11	25	12	11	28	23	31	18	11	26	18	ENSGALG00000043052	16	18036	20776
ENSGALG00000030416	HOXC5	33	1074080	1075791	1.80581	0.00389592	0.0090161	down	1	1	3	0	8	1	2	4	10	9	5	4	4	9	ENSGALG00000030270	16	14372	17201
ENSGALG00000039051	HOXC6	33	1068344	1070269	1.78354	4.82e-12	5.07e-11	down	28	59	56	56	133	69	55	119	217	190	194	147	199	193	ENSGALG00000015396	1	88719957	88732879
ENSGALG00000037262	HOXC8	33	1045438	1048859	1.38418	0.00343519	0.0080373	down	5	10	5	13	45	7	16	17	19	13	31	40	54	38	ENSGALG00000015395	1	88706603	88713873
ENSGALG00000029439	HOXC9	33	1034458	1037315	2.07509	0.00353721	0.00825617	down	3	1	0	2	51	10	8	42	34	10	40	41	56	31	ENSGALG00000019231	1	83437067	83457590
ENSGALG00000037272	HOXD8	7	16355650	16357570	1.07276	1.86e-06	7.9e-06	down	159	191	182	255	184	130	160	316	257	525	284	197	227	268	ENSGALG00000013748	2	94012286	94030148
ENSGALG00000020741	HPS6	6	22537516	22539975	1.2024	2.36e-12	2.6e-11	up	756	874	779	804	703	861	894	190	230	166	327	495	269	324	ENSGALG00000035599	3	68172467	68176409
ENSGALG00000022586	HPX	1	194439299	194442894	1.57933	0.000832772	0.00220636	up	116	284	128	71	183	18	28	25	23	43	25	46	15	48	ENSGALG00000015441	1	91604244	91650623
ENSGALG00000024171	HRH2	13	10466445	10469938	1.56557	6.45e-06	2.51e-05	up	56	50	77	54	42	24	26	14	6	5	9	18	20	17	ENSGALG00000001729	10	2176061	2184164
ENSGALG00000040675	HS3ST2	14	7069189	7078708	1.01774	1.55e-08	9.3e-08	down	100	103	134	146	183	158	112	265	190	228	249	232	168	173	ENSGALG00000008669	7	13495614	13507829
ENSGALG00000025906	HS6ST3	1	145569379	145570098	2.90476	0.00185554	0.00458361	up	7	2	10	3	7	5	4	1	0	3	0	0	0	0	ENSGALG00000016720	3	110468638	110535055
ENSGALG00000045920	HSD17B3	Z	42114955	42137774	1.57357	0.0144811	0.0292963	up	8	13	2	3	4	11	19	1	3	1	2	1	6	2	ENSGALG00000007713	18	10504470	10508384
ENSGALG00000033212	HSP90AA1	5	49564706	49571912	1.67522	4.69e-14	6.77e-13	up	47097	30475	34168	59977	71784	26718	34239	9431	7637	8336	8911	16272	12488	13185	ENSGALG00000019755	18	10510367	10511097
ENSGALG00000009248	HSPA12A	6	28905280	28952030	2.27275	2.81e-22	1.47e-20	up	119	73	82	99	107	131	130	8	21	26	18	25	10	15	ENSGALG00000021688	28	877655	881866
ENSGALG00000001000	HSPA5	17	10076957	10081027	1.08178	6.78e-13	8.13e-12	up	14945	11348	13434	17141	17986	10831	12622	4389	4699	4576	4325	6556	7320	5121	ENSGALG00000008439	1	11182192	11218268
ENSGALG00000001926	HSPB1	19	4228616	4230508	1.91289	1.13e-15	2.12e-14	down	4066	3517	5060	7477	6987	6600	7127	24738	17364	25028	15786	11916	11865	13174	ENSGALG00000014508	4	77172736	77193248
ENSGALG00000023772	HSPB7	21	4306473	4308156	1.86535	1.76e-12	1.98e-11	down	191	140	172	289	291	443	278	1204	815	809	626	679	469	567	ENSGALG00000007418	24	5457626	5460103
ENSGALG00000017077	HSPH1	1	175014605	175036647	1.51718	8.08e-13	9.56e-12	up	2026	1646	1757	3101	4017	1482	1646	529	590	659	578	859	478	691	ENSGALG00000007416	24	5450666	5455569
ENSGALG00000015895	HTR1B	3	80361173	80362338	1.39369	0.00676854	0.014798	down	33	43	13	38	39	32	53	22	82	270	25	57	29	27	ENSGALG00000014477	1	77208503	77219967
ENSGALG00000004066	HTR6	21	4776627	4780129	1.2671	6.2e-06	2.42e-05	down	20	10	22	13	20	19	37	52	37	25	46	30	32	47	ENSGALG00000007015	20	10824114	10827796
ENSGALG00000004562	HVCN1	15	6026586	6036124	1.4088	1.04e-07	5.43e-07	up	1464	1028	1443	2253	850	439	769	298	356	465	278	381	339	331	ENSGALG00000006415	4	4393007	4397055
ENSGALG00000033943	HYI	8	19841597	19843957	1.31573	1.01e-15	1.9e-14	down	55	72	65	114	106	78	104	161	182	185	181	184	145	136	ENSGALG00000039080	5	18956776	19014765
ENSGALG00000005328	IBA57	2	2332065	2336515	1.00535	1.9e-18	5.39e-17	up	365	359	358	449	330	366	445	132	143	135	166	223	112	156	ENSGALG00000015355	1	87434456	87455171
ENSGALG00000008656	ICOS	7	13431325	13441393	2.65721	1.13e-23	7.49e-22	up	514	420	402	423	285	186	220	20	36	32	37	67	53	69	ENSGALG00000035856	25	1283095	1284656
ENSGALG00000031637	ICOSLG	1	110383415	110393891	2.46484	2.12e-19	7.03e-18	up	617	455	472	572	437	385	610	24	60	46	90	156	41	110	ENSGALG00000031735	5	26067	29496
ENSGALG00000039474	ID4	2	59931746	59933580	1.20361	1.62e-15	2.93e-14	down	265	381	346	422	401	420	369	651	658	743	794	568	473	893	ENSGALG00000043016	5	22001	24367
ENSGALG00000038924	IDE	6	20741800	20794790	1.17181	1.33e-12	1.53e-11	up	791	710	542	531	560	597	734	143	204	156	222	373	241	265	ENSGALG00000005194	Z	9056706	9060302
ENSGALG00000021627	IFI27L1	23	4357815	4358727	1.99034	3.79e-16	7.65e-15	down	2643	1048	1805	1603	1670	1913	2418	9735	8126	4488	5557	4086	3919	4965	ENSGALG00000002383	Z	9066089	9069222
ENSGALG00000013865	IFNGR1	3	54973932	54992674	1.92744	7.7e-15	1.27e-13	up	1027	568	595	619	372	516	724	78	100	87	131	277	154	114	ENSGALG00000004594	13	13146841	13150694
ENSGALG00000040651	IGF1R	10	16697772	16838212	1.06241	2.66e-12	2.91e-11	up	517	429	314	366	466	379	521	140	138	120	217	228	146	160	ENSGALG00000000251	27	1793526	1797961
ENSGALG00000011468	IGFBP5	7	23359550	23376226	2.12919	2.22e-16	4.63e-15	down	122	175	169	214	190	193	207	1033	593	915	422	363	556	423	ENSGALG00000015474	1	92260427	92282945
ENSGALG00000012755	IGF-I	1	55335204	55383631	3.1923	4.12e-06	1.65e-05	up	11	11	11	7	10	7	23	1	1	0	1	0	0	4	ENSGALG00000006546	5	13624272	13646533
ENSGALG00000021139	IGLL1	15	7973416	7997739	1.25472	0.000144342	0.000440669	up	9542	5370	10163	8228	12559	4188	2908	1765	2211	3078	1219	1941	2251	5344	ENSGALG00000038217	5	21975146	22009083
ENSGALG00000030005	IGSF1	20	65206	68264	1.17968	4.99e-06	1.97e-05	up	215	253	162	267	206	93	196	37	77	102	59	45	100	64	ENSGALG00000046032	2	60893104	60904213
ENSGALG00000044293	IGSF10	9	23578710	23590966	1.92699	7.41e-12	7.55e-11	up	194	114	133	121	200	70	58	16	29	25	29	37	21	32	ENSGALG00000014362	1	76641354	76652029
ENSGALG00000007059	IGSF6	14	8783763	8789240	1.0169	9.62e-08	5.06e-07	up	242	235	197	289	187	117	167	51	92	75	77	75	106	88	ENSGALG00000038559	4	86242515	86353778
ENSGALG00000013086	IKZF1	2	80928032	80986405	2.46421	5.42e-14	7.77e-13	up	727	756	712	817	393	194	276	45	59	107	44	96	127	79	ENSGALG00000015900	4	86325634	86375374
ENSGALG00000013481	IKZF3	27	4678352	4696420	1.94012	1.94e-06	8.21e-06	up	474	489	529	723	287	116	187	34	67	166	24	77	113	94	ENSGALG00000015902	4	86469040	86474132
ENSGALG00000001409	IL12B	13	8148378	8157639	1.93025	0.025605	0.0487673	down	1	2	5	1	0	1	0	2	5	15	3	1	2	2	ENSGALG00000017274	1	74491375	74515119
ENSGALG00000020316	IL13RA2	4	2848848	2864846	1.13223	0.000690126	0.00185184	up	157	165	124	205	103	65	48	21	45	81	34	59	47	27	ENSGALG00000008359	3	3328455	3330821
ENSGALG00000016678	IL17A	3	108025083	108027181	1.30527	0.0144986	0.0293258	up	23	16	14	29	5	9	4	3	5	6	0	4	7	7	ENSGALG00000024488	1	128604508	128627813
ENSGALG00000033887	IL17RA	1	61679420	61699251	1.24375	4.49e-13	5.58e-12	up	910	686	559	680	534	444	550	124	200	157	218	266	252	263	ENSGALG00000009075	4	17755530	17769639
ENSGALG00000008554	IL17REL	1	20036081	20070713	2.10059	6.46e-12	6.65e-11	up	253	292	254	270	250	137	215	15	43	18	28	74	48	93	ENSGALG00000007382	21	4892861	4896434
ENSGALG00000007874	IL18	24	6140262	6143113	1.2033	2.93e-06	1.21e-05	up	205	189	113	199	102	70	96	30	63	50	40	38	59	56	ENSGALG00000017004	1	169134671	169142953
ENSGALG00000000911	IL19	26	2575866	2577627	1.40569	0.00999967	0.0210467	down	3	4	2	1	2	1	4	6	4	2	6	7	6	5	ENSGALG00000014038	1	6327502	6445602
ENSGALG00000046326	IL1R2	1	133825648	133835138	2.61057	2.27e-10	1.81e-09	up	117	143	89	219	40	50	97	2	25	8	13	27	16	9	ENSGALG00000005248	8	11761191	11818064
ENSGALG00000013869	IL20RA	3	55035015	55055817	1.01824	0.00177388	0.00440247	up	686	498	556	493	212	256	189	101	166	206	63	138	220	242	ENSGALG00000012627	Z	42215456	42261277
ENSGALG00000006318	IL21R	14	7350388	7363147	1.39707	0.0117845	0.0243574	up	434	353	407	634	191	78	108	40	130	186	12	71	117	102	ENSGALG00000016816	1	136939808	136959022
ENSGALG00000009904	IL22	1	35101235	35103693	2.35758	2.77e-05	9.65e-05	up	75	95	42	42	13	57	15	7	5	18	0	9	11	2	ENSGALG00000009971	8	19746944	19752319
ENSGALG00000042471	IL2RA	1	3482204	3498520	4.66438	3.3e-49	7.63e-46	up	424	319	205	282	240	159	200	4	5	3	6	17	14	9	ENSGALG00000046188	Z	16675085	16704790
ENSGALG00000005638	IL2RG	4	2403107	2407572	1.13399	9.27e-05	0.000293553	up	1646	1527	1765	2296	1277	634	753	363	478	719	208	542	669	590	ENSGALG00000007610	13	18174552	18186230
ENSGALG00000030800	IL31RA	Z	16989926	17012645	1.79418	1.76e-13	2.3e-12	up	153	94	69	63	104	96	100	20	16	14	35	30	20	22	ENSGALG00000038469	2	569650	582544
ENSGALG00000000081	IL4I1	16	205312	210738	2.07111	4.65e-06	1.84e-05	up	92	92	74	95	62	14	41	4	19	13	3	15	28	7	ENSGALG00000026095	17	1971559	1972040
ENSGALG00000014716	IL6ST	Z	17028163	17060894	1.7946	1.39e-38	5.84e-36	up	774	567	438	494	621	601	595	109	116	121	143	194	129	134	ENSGALG00000000596	27	3024097	3050899
ENSGALG00000013372	IL7R	Z	10887181	10900142	2.44484	4.07e-25	3.27e-23	up	1900	2089	1083	1244	1003	929	831	145	160	193	130	184	280	235	ENSGALG00000024332	28	2690062	2695364
ENSGALG00000026098	IL8	4	51283110	51286274	1.74301	6.04e-05	0.000197808	up	78	25	18	48	36	28	8	10	13	9	5	7	5	8	ENSGALG00000036413	AADN04017341.1	525	3662
ENSGALG00000011668	IL8L1	4	51270481	51273558	1.46253	0.000164053	0.000495452	up	182	129	214	202	75	81	54	22	53	35	7	70	31	59	ENSGALG00000014448	Z	27444606	27454018
ENSGALG00000015897	IMPG1	3	80679194	80732860	1.20052	3.53e-05	0.000120568	down	12	12	16	9	12	10	10	23	10	22	19	33	19	23	ENSGALG00000015061	3	66787972	66824444
ENSGALG00000015322	IMPG2	1	85206272	85256440	1.02126	0.000106269	0.000332609	down	85	70	107	184	170	106	101	230	130	182	200	123	129	325	ENSGALG00000004796	21	6358184	6379434
ENSGALG00000044612	INAVA	26	1130652	1134161	1.37305	1.48e-25	1.27e-23	down	412	475	595	477	482	540	598	1011	1255	1279	934	932	882	1084	ENSGALG00000009158	3	12273168	12439182
ENSGALG00000011608	INF2	5	51578235	51595388	1.02236	2.09e-15	3.7e-14	up	357	337	265	475	377	362	421	131	145	143	182	126	125	162	ENSGALG00000011432	5	49992040	50076434
ENSGALG00000035777	INKA1	12	2403201	2404925	1.63059	2.19e-05	7.75e-05	down	7	14	15	18	25	24	15	58	12	74	46	26	32	37	ENSGALG00000038556	1	51255996	51257906
ENSGALG00000013137	INO80C	2	84195608	84205148	1.14194	5.48e-10	4.1e-09	up	136	126	105	92	81	98	88	37	55	34	40	37	32	28	ENSGALG00000010551	3	31854446	31855207
ENSGALG00000029709	INPP4A	1	132233125	132302337	1.40347	4.53e-40	2.62e-37	up	658	659	616	658	583	513	690	122	189	162	214	206	207	225	ENSGALG00000023364	18	9095794	9103160
ENSGALG00000009880	INPP4B	4	30289661	30557052	2.329	2.56e-23	1.59e-21	up	285	192	144	180	188	255	209	17	37	27	25	71	29	29	ENSGALG00000028119	25	2642231	2645539
ENSGALG00000001964	INPP5E	17	8360606	8367535	1.05206	6.4e-22	3.12e-20	up	302	295	263	297	265	255	353	112	109	94	130	143	89	105	ENSGALG00000027258	Z	44758614	44850363
ENSGALG00000023266	INPP5J	15	10038799	10047703	1.00917	5.5e-19	1.71e-17	down	1135	1559	1309	1328	1584	1658	1757	2164	2738	2486	2173	2523	2383	2122	ENSGALG00000001616	15	672190	684562
ENSGALG00000040758	INSR	28	4133024	4167171	1.1547	2.25e-17	5.52e-16	up	2103	2044	1678	1433	1777	1434	2402	465	596	616	664	917	655	733	ENSGALG00000016704	3	109326995	109358885
ENSGALG00000002710	IPMK	6	5253421	5283874	1.51265	2.2e-06	9.26e-06	up	1937	1771	1293	936	1802	1790	2235	172	445	143	576	1083	433	563	ENSGALG00000036519	27	4823987	4828032
ENSGALG00000012953	IPO8	1	59686745	59727927	1.0497	2.27e-21	1.01e-19	up	778	745	594	646	624	557	755	194	221	276	248	333	262	281	ENSGALG00000006051	8	14544898	14558894
ENSGALG00000005042	IQSEC1	12	5275752	5383940	1.65847	1.52e-11	1.47e-10	up	582	491	486	328	491	398	740	50	134	79	150	249	113	136	ENSGALG00000002469	8	3404602	3498996
ENSGALG00000015892	IRAK1BP1	3	79909975	79920267	1.00818	0.000138632	0.000424505	down	30	28	30	40	40	51	30	46	90	90	34	41	47	50	ENSGALG00000014513	1	77256837	77258980
ENSGALG00000012830	IRF4	2	66654456	66724634	1.68252	1.94e-09	1.34e-08	up	568	489	681	725	281	200	218	81	106	113	107	115	155	105	ENSGALG00000011692	5	52029376	52037014
ENSGALG00000004959	IRS1	9	9244127	9248424	1.04478	5.76e-06	2.26e-05	up	285	270	201	269	249	332	379	64	89	53	146	211	99	121	ENSGALG00000040833	7	17398533	17406361
ENSGALG00000026287	IRS2	1	138649358	138653145	1.24428	5.68e-05	0.000186973	up	1508	832	761	774	1198	1028	1725	130	356	138	417	798	424	447	ENSGALG00000035978	2	30643566	30664008
ENSGALG00000008107	IRS4	4	13928520	13947574	1.38344	3.39e-11	3.09e-10	up	571	326	374	450	485	373	514	66	131	76	183	220	151	132	ENSGALG00000021225	11	7850347	7856535
ENSGALG00000009042	ISM1	3	12714885	12753773	1.07396	0.00165092	0.00411828	down	63	37	62	101	99	67	145	161	125	238	107	44	87	175	ENSGALG00000040447	2	43219475	43240492
ENSGALG00000040474	ITCH	20	1525963	1560004	1.76324	3.19e-16	6.5e-15	up	474	482	368	308	415	274	487	48	81	74	123	176	89	80	ENSGALG00000010752	8	25223275	25226916
ENSGALG00000014891	ITGA1	Z	15771740	15844439	1.75502	4.54e-17	1.05e-15	up	2150	1492	1520	1981	2266	3017	2955	276	495	431	572	936	449	544	ENSGALG00000000608	11	19110019	19123142
ENSGALG00000014903	ITGA2	Z	15862498	15924378	1.15577	2.74e-15	4.78e-14	up	209	214	152	190	139	168	165	55	64	72	58	72	72	49	ENSGALG00000032022	2	72373714	72468691
ENSGALG00000041577	ITGA4	7	14373277	14404802	1.92338	2.29e-10	1.82e-09	up	1241	1068	934	994	546	333	394	96	148	244	86	222	189	174	ENSGALG00000039985	11	12275000	12354154
ENSGALG00000034007	ITGA6	7	17799837	17838429	1.34708	2.15e-07	1.07e-06	up	2652	2438	1453	1298	1655	2143	2714	323	530	326	742	1316	572	818	ENSGALG00000005483	11	16185639	16626612
ENSGALG00000008747	ITGA8	2	20364201	20463104	1.46275	9.67e-24	6.53e-22	up	522	378	549	555	592	403	496	139	144	183	154	129	102	156	ENSGALG00000030040	11	18848270	18852866
ENSGALG00000029378	ITGA9	2	48876022	49109764	1.61411	2.45e-35	7.7e-33	up	537	519	536	596	582	714	732	153	161	114	183	164	122	206	ENSGALG00000035094	2	126538859	126565346
ENSGALG00000002655	ITGAV	7	1319204	1364895	2.54721	5.61e-31	9.52e-29	up	1735	1659	896	936	960	1073	1605	116	173	115	170	333	131	196	ENSGALG00000036097	2	74510089	74695043
ENSGALG00000016421	ITGB1BP1	3	96599625	96606686	1.00568	1.92e-14	2.94e-13	down	439	432	516	587	503	421	451	826	859	934	726	676	591	711	ENSGALG00000013775	2	95483121	95558733
ENSGALG00000005493	ITGB1BP2	4	2272568	2278335	1.4311	0.0053705	0.0120198	down	6	18	14	8	3	4	3	3	18	30	21	7	17	25	ENSGALG00000015132	2	105084273	105197912
ENSGALG00000011141	ITGB6	7	21907409	21935081	1.31895	0.000395028	0.00111039	up	1349	626	387	442	533	772	958	84	253	46	218	427	357	273	ENSGALG00000012906	2	68849329	68961557
ENSGALG00000003857	ITK	13	11417545	11445164	2.38515	1.96e-12	2.2e-11	up	316	302	200	286	180	71	108	18	31	37	12	38	49	38	ENSGALG00000007211	20	10851610	10885641
ENSGALG00000034898	ITPK1	5	44965411	45115958	1.13798	9.62e-06	3.63e-05	up	3723	3780	2125	2171	3185	3885	4495	694	1332	426	1533	2023	1202	1465	ENSGALG00000005102	20	7546069	7840288
ENSGALG00000008603	ITPKA	5	24667542	24702169	1.27366	3.21e-07	1.55e-06	up	430	382	219	253	262	214	469	61	109	48	165	119	98	143	ENSGALG00000032349	11	11674123	11703375
ENSGALG00000014071	ITPR2	1	67751004	67983940	2.1005	3.32e-30	5.12e-28	up	872	825	585	596	697	500	731	85	101	97	155	221	135	110	ENSGALG00000012917	2	69532901	69629569
ENSGALG00000025780	ITPRIP	6	24263534	24265183	1.94817	8.26e-15	1.36e-13	up	506	292	312	376	254	155	238	34	49	81	41	85	74	77	ENSGALG00000013782	2	95819538	95897002
ENSGALG00000033806	ITPRIPL2	14	8506006	8507508	1.725	2.34e-11	2.19e-10	up	127	89	83	97	93	124	115	13	18	11	39	51	20	27	ENSGALG00000005319	11	12984674	13144905
ENSGALG00000036677	ITSN1	1	105492244	105575073	1.26366	1.57e-25	1.34e-23	up	1624	1124	1215	1310	1349	1444	1709	353	420	536	476	622	412	436	ENSGALG00000012923	2	71456440	71525194
ENSGALG00000011031	JAK1	8	28300111	28351163	1.91951	4.91e-28	5.79e-26	up	6507	5817	4689	5686	4375	3392	4552	604	870	928	1176	1713	1120	1051	ENSGALG00000002314	6	3035224	3068706
ENSGALG00000015027	JAK2	Z	27532878	27615447	1.29667	1.24e-16	2.69e-15	up	918	786	688	711	821	666	890	148	215	185	318	379	284	270	ENSGALG00000003285	13	10365016	10375987
ENSGALG00000033234	JAK3	28	3339736	3346314	1.30987	0.000503164	0.00138799	up	1339	1234	1206	1436	570	381	422	121	202	462	113	342	531	332	ENSGALG00000008109	1	14151339	14182335
ENSGALG00000001472	JAM3	24	2491132	2515882	1.06625	1.88e-10	1.52e-09	up	306	241	277	406	344	390	469	103	119	176	100	155	121	150	ENSGALG00000036502	14	12461091	12470750
ENSGALG00000011551	JCHAIN	4	50344974	50350757	2.77664	1.35e-16	2.9e-15	up	4565	2513	4524	3084	4500	1474	1405	173	305	341	229	357	321	889	ENSGALG00000003085	6	8734947	8742973
ENSGALG00000014819	JMY	Z	22350435	22404547	1.52372	3.11e-11	2.85e-10	up	295	240	238	225	230	248	259	31	76	65	61	157	49	54	ENSGALG00000006144	11	19004702	19008792
ENSGALG00000041766	JOSD1	1	50869595	50876857	1.07538	1.8e-12	2.02e-11	up	284	205	212	230	240	184	259	73	78	55	107	133	71	99	ENSGALG00000001382	21	2000641	2022446
ENSGALG00000035845	JPH1	2	118543324	118621765	1.36013	7.57e-09	4.76e-08	up	526	377	242	239	240	393	415	56	98	79	142	178	122	91	ENSGALG00000001731	27	4573382	4599083
ENSGALG00000043641	JUND	28	3991326	3992297	1.04941	8.92e-07	4.02e-06	down	870	761	773	936	1157	1513	1313	2333	1661	879	1896	2070	1273	2008	ENSGALG00000043243	2	50062031	50120197
ENSGALG00000041978	K123	1	3465887	3476005	2.29451	1.98e-08	1.16e-07	up	667	514	397	598	180	78	137	43	60	76	22	60	90	62	ENSGALG00000009062	2	21877225	22125099
ENSGALG00000001172	KBP	21	1440804	1450372	1.08672	1.18e-05	4.36e-05	down	76	142	60	83	117	94	116	202	130	70	220	243	155	152	ENSGALG00000008428	7	11637210	11669559
ENSGALG00000022887	KBTBD11	3	91198903	91200687	1.87807	8.8e-10	6.36e-09	up	152	141	130	108	176	128	249	12	45	10	30	70	33	42	ENSGALG00000011456	1	45800053	45837648
ENSGALG00000007569	KBTBD8	12	14641980	14647729	1.28321	1.39e-11	1.34e-10	up	403	356	267	296	301	256	329	54	119	69	135	167	73	120	ENSGALG00000000692	26	2156419	2171476
ENSGALG00000036942	KCNA3	26	1481250	1482992	1.64056	7.59e-06	2.92e-05	up	195	172	124	199	98	32	54	17	32	21	22	41	54	37	ENSGALG00000015051	3	66536015	66649661
ENSGALG00000037241	KCNAB2	21	656092	672722	1.32653	6.65e-08	3.58e-07	up	196	149	201	228	148	75	113	46	60	60	25	55	58	47	ENSGALG00000032699	33	617930	620154
ENSGALG00000031693	KCNB2	2	117864954	118036791	1.30336	7.5e-06	2.89e-05	up	27	33	30	19	41	28	40	5	10	8	17	9	8	14	ENSGALG00000034919	15	5081945	5097271
ENSGALG00000009066	KCND2	1	23783751	23786181	1.2447	1e-05	3.78e-05	up	53	26	40	67	35	56	88	12	12	17	21	27	13	21	ENSGALG00000039190	5	383892	384770
ENSGALG00000009919	KCNG3	3	23983111	23992881	1.23957	0.0140244	0.028475	up	8	13	7	13	22	18	12	5	0	1	6	11	2	7	ENSGALG00000008462	18	4632163	4636598
ENSGALG00000007666	KCNIP2	6	22648959	22669344	1.17832	3.31e-05	0.000113891	down	176	93	199	384	332	309	334	639	585	535	268	383	299	542	ENSGALG00000034095	KQ759368.1	8521	11406
ENSGALG00000004373	KCNJ16	18	8243078	8244367	1.49795	1.09e-05	4.06e-05	up	4348	3828	2427	1345	1939	2255	4170	360	637	289	1098	1950	837	750	ENSGALG00000041907	27	1657762	1658664
ENSGALG00000011005	KCNK1	3	38812253	38839576	1.89609	3.53e-10	2.72e-09	up	782	683	476	406	435	648	760	51	85	49	138	268	178	152	ENSGALG00000025729	7	22490836	22491783
ENSGALG00000010672	KCNK13	5	43755694	43807523	1.61606	0.000164668	0.000497228	up	32	10	18	23	23	21	44	4	8	1	12	13	4	3	ENSGALG00000006738	20	10535101	10540894
ENSGALG00000010068	KCNK17	3	29180232	29204363	2.05101	5.33e-08	2.92e-07	up	108	79	60	76	73	21	38	5	6	13	14	26	7	18	ENSGALG00000041102	17	5006022	5105974
ENSGALG00000034077	KCNK5	3	29274506	29304143	2.07317	2.4e-09	1.64e-08	up	812	752	426	215	451	371	640	36	71	47	143	225	68	130	ENSGALG00000036452	27	4192063	4218032
ENSGALG00000037285	KCNK9	2	145106627	145199529	3.29907	0.00548374	0.0122497	up	1	6	4	0	4	1	5	0	0	1	0	0	0	0	ENSGALG00000009476	2	22731404	22863502
ENSGALG00000002118	KCNMB1	13	3783482	3790486	1.23279	8.52e-10	6.17e-09	down	842	672	944	1244	1190	1366	1181	2587	2021	2666	1561	1601	1463	1841	ENSGALG00000014790	Z	21927643	21950370
ENSGALG00000010044	KCNMB4	1	35820990	35831958	1.20799	3.55e-06	1.44e-05	down	10	21	29	19	20	32	23	27	53	31	58	46	26	47	ENSGALG00000035576	17	5434507	5441114
ENSGALG00000037138	KCNQ1	5	13449733	13471369	1.93631	2.81e-08	1.61e-07	up	342	327	300	239	298	288	400	22	37	16	57	155	102	82	ENSGALG00000012677	2	59246188	59622261
ENSGALG00000037626	KCNQ3	2	141521126	141705820	1.47295	2.94e-06	1.21e-05	up	32	16	22	29	23	36	23	8	5	3	10	7	10	9	ENSGALG00000012295	5	57923483	57931001
ENSGALG00000016470	KCNS3	3	100717226	100718710	1.01927	1.38e-05	5.06e-05	up	44	59	87	81	72	83	101	29	31	18	47	22	33	27	ENSGALG00000010119	4	34292374	34329678
ENSGALG00000005138	KCTD10	15	6792641	6799711	2.04916	1.59e-26	1.53e-24	up	576	453	410	432	476	428	579	56	86	52	128	137	64	134	ENSGALG00000016529	1	120520180	120619365
ENSGALG00000033816	KCTD12	1	154526417	154527393	2.36558	1.79e-26	1.71e-24	up	79	62	76	87	89	75	80	6	8	15	20	12	8	16	ENSGALG00000028318	26	1588453	1591609
ENSGALG00000012322	KCTD16	13	17658234	17692276	3.1399	0.00259507	0.00622594	up	4	5	4	3	3	6	0	1	0	0	0	1	0	0	ENSGALG00000022980	1	72191984	72195253
ENSGALG00000017268	KCTD21	1	192907826	192908608	1.31024	4.17e-05	0.000140792	up	38	15	37	33	60	31	36	6	6	12	16	18	11	12	ENSGALG00000034505	Z	78627025	78636973
ENSGALG00000006423	KCTD5	14	7412251	7429855	1.15726	7.2e-16	1.39e-14	up	365	361	273	285	317	289	351	81	86	92	139	169	115	126	ENSGALG00000010661	4	40109595	40112496
ENSGALG00000033469	KDM1A	23	1719983	1747069	1.88392	3.68e-32	7.4e-30	up	854	709	594	639	626	570	768	110	127	110	130	267	134	164	ENSGALG00000026137	Z	78638971	78642380
ENSGALG00000012685	KDM1B	2	60547020	60573397	1.19813	1.18e-12	1.37e-11	up	705	588	447	414	410	415	527	104	201	156	188	271	149	166	ENSGALG00000010537	8	24025736	24029708
ENSGALG00000035108	KDM7A	1	56754302	56787545	1.4982	1.44e-08	8.7e-08	up	289	315	132	135	239	212	320	32	59	38	75	118	70	81	ENSGALG00000012220	5	56605358	56611639
ENSGALG00000012882	KDSR	2	68075920	68093682	1.0851	2.54e-08	1.46e-07	up	441	547	369	415	405	474	565	91	176	94	211	283	169	209	ENSGALG00000002358	Z	72942623	72952484
ENSGALG00000033123	KEAP1	KQ759610.1	3683	12323	1.09634	8.53e-18	2.23e-16	down	300	323	330	387	448	358	343	710	611	586	472	611	631	600	ENSGALG00000035419	24	323205	352144
ENSGALG00000011270	KERA	1	43969658	43979925	1.82752	0.0148985	0.0300322	down	2	0	3	1	1	2	1	5	4	2	9	1	6	1	ENSGALG00000028840	1	71252534	71391292
ENSGALG00000013771	KIAA1211	4	65222692	65243920	1.0393	6.14e-05	0.00020075	up	3079	4110	2011	1274	1910	1565	3022	532	906	576	1368	1414	864	1053	ENSGALG00000025743	14	8741731	8754600
ENSGALG00000030324	KIAA1324L	1	7556518	7647412	1.04934	1.03e-06	4.58e-06	up	308	428	183	229	223	269	207	85	88	102	164	111	72	93	ENSGALG00000026295	18	10689816	10703975
ENSGALG00000002419	KIAA1328	Z	6946050	7102756	1.41874	7e-08	3.76e-07	up	216	172	99	101	115	163	165	39	27	18	49	75	41	63	ENSGALG00000011227	4	47124908	47149837
ENSGALG00000023083	KIAA1958	Z	65959646	65980352	1.74838	0.000483317	0.00133743	up	33	21	25	25	24	59	57	4	2	1	13	28	6	6	ENSGALG00000030406	22	322628	341454
ENSGALG00000004533	KIAA2013	21	5531113	5536808	1.91082	6.44e-23	3.75e-21	up	876	884	550	624	632	664	780	67	146	128	155	249	130	208	ENSGALG00000013784	11	18702043	18705332
ENSGALG00000030597	KIF11	6	20718576	20734605	1.02682	3.32e-13	4.19e-12	up	1318	775	1107	1089	763	706	942	349	415	422	324	393	349	359	ENSGALG00000032316	2	42781752	42789165
ENSGALG00000002726	KIF1B	21	3630055	3710113	1.40728	8.06e-22	3.86e-20	up	1499	1610	1032	1190	1401	1385	1954	393	345	444	490	599	345	420	ENSGALG00000005679	13	13232069	13242308
ENSGALG00000034347	KIF21B	26	280212	292746	3.27072	2.03e-18	5.74e-17	up	152	132	108	124	85	41	48	3	4	11	6	12	14	7	ENSGALG00000034983	1	176067483	176070939
ENSGALG00000005806	KIF24	Z	7583409	7608241	1.07323	3.45e-06	1.4e-05	up	142	120	80	95	80	125	48	32	45	40	33	32	39	41	ENSGALG00000007657	4	12159094	12167695
ENSGALG00000011299	KIF25	3	42197887	42223817	1.04751	5.87e-05	0.000193	down	37	88	52	97	37	41	57	70	96	123	135	116	53	81	ENSGALG00000012978	11	15487397	15539333
ENSGALG00000010664	KIF26B	3	34440793	34727673	1.51353	1.32e-12	1.52e-11	up	147	131	200	233	169	285	271	40	58	60	43	52	60	89	ENSGALG00000026525	11	10433513	10434487
ENSGALG00000007215	KIF5B	2	14204995	14236088	1.30269	4.24e-11	3.8e-10	up	2789	2426	1688	1787	1939	2203	2815	407	700	435	830	1295	728	763	ENSGALG00000008014	20	13926767	13928100
ENSGALG00000005517	KIF9	2	3971607	3992312	1.20883	1.33e-09	9.35e-09	down	76	75	100	70	53	65	69	125	171	180	139	131	73	118	ENSGALG00000040180	2	108248344	108249313
ENSGALG00000043034	KIFC3	11	527204	534806	1.15828	3.09e-09	2.07e-08	down	576	578	685	794	898	1183	1136	1698	1453	1783	1300	1616	938	1592	ENSGALG00000032365	11	10448330	10453866
ENSGALG00000008386	KIZ	3	3599200	3639925	1.05709	3.22e-13	4.07e-12	down	147	174	199	180	184	111	201	305	292	316	267	238	262	290	ENSGALG00000040335	3	33603675	33618964
ENSGALG00000017068	KL	1	174247036	174291621	1.95475	4.44e-06	1.76e-05	up	21	26	10	54	66	31	41	9	2	6	9	9	4	12	ENSGALG00000013034	1	61754952	61846994
ENSGALG00000016926	KLF12	1	155608716	155863461	1.64119	2.48e-11	2.3e-10	up	92	61	66	93	60	61	75	17	12	19	18	37	19	8	ENSGALG00000034436	17	7248755	7254132
ENSGALG00000016927	KLF5	1	156077321	156094516	1.51174	3.41e-07	1.64e-06	up	1108	1280	734	716	786	1270	1265	139	251	85	372	599	286	334	ENSGALG00000034809	33	1533611	1537237
ENSGALG00000006776	KLHDC8B	12	11553069	11555613	1.14262	5.48e-06	2.15e-05	down	86	90	121	175	164	214	235	389	253	305	301	252	174	209	ENSGALG00000004568	21	5542455	5547227
ENSGALG00000020737	KLHL23	7	18682039	18685720	1.00444	0.000121633	0.000376621	down	15	13	27	20	11	14	29	31	31	38	31	26	23	25	ENSGALG00000008097	5	22804759	22852407
ENSGALG00000002277	KLHL24	9	2573431	2586955	1.20454	1.45e-25	1.25e-23	up	715	470	510	598	645	518	659	151	192	173	248	243	208	213	ENSGALG00000034590	1	5528711	5974445
ENSGALG00000005651	KLHL36	11	17068157	17080221	1.23121	3.25e-14	4.8e-13	up	278	331	253	330	295	242	296	63	76	115	100	166	85	88	ENSGALG00000002413	Z	6773306	6853237
ENSGALG00000002263	KLHL6	9	2544469	2562883	1.38246	1.19e-05	4.42e-05	up	557	470	573	927	404	194	199	82	130	214	88	137	170	187	ENSGALG00000026716	28	1295618	1324534
ENSGALG00000030943	KRAS	1	67241669	67263388	1.04305	8.2e-05	0.00026227	up	448	445	224	198	283	335	410	63	122	76	182	252	125	108	ENSGALG00000043355	1	15740825	15899595
ENSGALG00000042508	KRI1	KQ759660.1	2514	9304	1.00072	2.97e-09	1.99e-08	down	155	143	164	157	146	109	145	220	213	355	217	195	203	206	ENSGALG00000036763	12	9026357	9037049
ENSGALG00000030002	KRT18	KQ759485.1	15459	25539	1.11862	8.89e-16	1.69e-14	down	3815	3061	2619	3299	3253	3411	3805	6592	7273	4700	5099	5738	6431	4181	ENSGALG00000006413	10	12248442	12295841
ENSGALG00000005685	KSR1	19	9192199	9230027	1.4498	2.18e-14	3.3e-13	up	955	793	533	504	502	585	733	139	202	123	234	308	186	170	ENSGALG00000032320	5	407815	416465
ENSGALG00000014615	LAMA1	2	99747385	99848774	1.31662	1.2e-23	7.86e-22	up	656	735	803	749	807	748	864	214	258	301	260	182	203	294	ENSGALG00000037735	16	56578	58190
ENSGALG00000007917	LAMB4	1	14926773	14978515	1.09216	3.08e-05	0.000106479	down	38	51	72	66	46	45	84	100	96	179	66	73	74	84	ENSGALG00000011683	4	51915873	51947769
ENSGALG00000004620	LAMC1	8	7492312	7541469	1.43296	8.7e-42	5.97e-39	up	6139	5731	5129	5514	4792	5817	6542	1158	1676	1503	1933	2341	1485	1732	ENSGALG00000009690	3	21044044	21078629
ENSGALG00000008572	LAMP2	4	16487911	16504638	1.78234	2.16e-18	6.04e-17	up	1331	1116	838	931	1118	870	1265	107	220	167	325	403	255	285	ENSGALG00000014788	Z	21911041	21917215
ENSGALG00000008759	LAMP3	9	16420968	16432613	3.53826	1.08e-19	3.77e-18	up	508	424	312	351	182	59	205	6	22	33	16	16	17	30	ENSGALG00000005038	4	2094541	2108780
ENSGALG00000008918	LAMP5	3	13942840	13952475	1.05609	1.78e-08	1.06e-07	down	432	515	698	723	609	688	412	1147	799	1099	1105	885	604	1095	ENSGALG00000017148	1	179310484	179327166
ENSGALG00000029881	LAMTOR2	25	815282	817762	1.46783	1.23e-12	1.42e-11	down	147	236	291	300	222	242	256	692	689	543	365	337	494	576	ENSGALG00000014753	Z	20549127	20570556
ENSGALG00000016265	LANCL3	1	113222082	113251614	1.11689	0.00280124	0.00667473	up	28	9	22	19	27	18	45	7	7	9	10	18	7	4	ENSGALG00000038411	8	5564122	5567033
ENSGALG00000045196	LAPTM4B	2	127896686	127957080	1.42069	5.78e-08	3.15e-07	up	112	112	104	136	135	61	80	18	19	38	26	62	36	23	ENSGALG00000011914	1	49496089	49502094
ENSGALG00000038636	LAPTM5	23	270344	284774	1.48079	8.99e-10	6.48e-09	up	3358	2464	2891	3790	2131	1124	1497	405	771	649	509	866	921	824	ENSGALG00000013494	11	15588852	15595346
ENSGALG00000012559	LARGE1	1	52729204	53004111	1.25799	9.89e-12	9.84e-11	up	432	298	349	272	217	215	244	71	106	108	82	136	68	111	ENSGALG00000016609	3	105902929	105909634
ENSGALG00000040109	LARP1	13	12056462	12099062	1.11113	4.44e-15	7.53e-14	up	4761	5182	4105	4065	4783	4234	4811	1145	1641	1066	1827	2546	1805	1942	ENSGALG00000004687	12	3334370	3451194
ENSGALG00000042122	LARP4	33	224485	236129	1.42794	4.11e-14	5.99e-13	up	911	1031	666	543	653	591	823	170	195	136	232	371	237	228	ENSGALG00000016692	3	109266889	109273908
ENSGALG00000006672	LARP4B	2	10303090	10352913	1.83019	3.45e-11	3.13e-10	up	960	644	415	344	449	489	738	100	98	56	173	259	102	136	ENSGALG00000024481	21	3726384	3729625
ENSGALG00000039299	LASP1	27	4466769	4484722	1.70566	1.55e-12	1.77e-11	up	2772	2742	2008	1839	2158	2222	2697	345	458	238	581	1209	612	683	ENSGALG00000028900	11	925643	942382
ENSGALG00000000466	LCK	23	5140463	5158527	1.61549	1.06e-07	5.52e-07	up	616	617	595	699	334	199	221	65	108	132	69	144	181	156	ENSGALG00000020210	4	39752033	39762452
ENSGALG00000016986	LCP1	1	168016257	168044872	1.56699	4.1e-08	2.29e-07	up	8341	6451	7945	8873	4938	2054	3248	1078	1535	1661	908	1750	2133	2190	ENSGALG00000027454	3	59770150	59778057
ENSGALG00000002113	LCP2	13	3848537	3877852	1.16458	0.000104493	0.000327493	up	1160	1130	989	1353	701	350	476	183	310	473	175	267	446	312	ENSGALG00000043607	18	5059701	5060705
ENSGALG00000038913	LDLRAD3	5	19303712	19373731	1.38263	1.41e-06	6.11e-06	up	51	30	43	38	60	42	84	14	6	15	23	18	16	14	ENSGALG00000000978	21	905170	916809
ENSGALG00000001051	LDLRAP1	23	2349304	2363415	1.00411	6.36e-14	9.05e-13	up	250	247	227	268	275	233	312	80	96	71	136	145	85	113	ENSGALG00000034989	18	7524842	7664182
ENSGALG00000006323	LECT2	13	15273853	15278709	1.90093	0.000631733	0.00170978	down	769	27	2	8	14	16	65	54	131	177	75	27	51	38	ENSGALG00000005368	Z	81488988	81527145
ENSGALG00000015706	LETM1	4	83900843	83923967	1.10325	5.51e-10	4.12e-09	up	913	923	571	495	638	637	838	220	247	172	327	388	283	242	ENSGALG00000017190	1	182813467	182848535
ENSGALG00000030687	LGI3	AADN04001460.1	19861	24535	1.08311	0.0108549	0.0226332	down	10	6	9	8	6	12	6	19	13	16	12	25	1	11	ENSGALG00000010562	5	40711035	40805874
ENSGALG00000010163	LGR5	1	36248569	36332580	1.34805	3.48e-07	1.67e-06	up	477	315	364	525	470	465	736	52	141	78	200	257	127	218	ENSGALG00000006895	18	9353242	9365235
ENSGALG00000000568	LGR6	26	423513	463485	2.03655	0.000790915	0.00210406	up	14	5	6	14	15	6	21	1	1	0	3	6	0	5	ENSGALG00000013776	4	65337549	65366967
ENSGALG00000043367	LHFPL3	1	13473708	13633870	3.35473	1.52e-07	7.76e-07	up	15	9	15	9	21	18	14	0	5	0	1	1	0	1	ENSGALG00000015836	3	77740723	77786312
ENSGALG00000003733	LIFR	Z	12007504	12048425	1.09735	2.47e-15	4.33e-14	up	323	288	232	243	291	354	339	86	117	137	118	115	101	98	ENSGALG00000007310	24	5246399	5280516
ENSGALG00000001995	LIMS2	9	1360123	1375264	1.57737	1.85e-13	2.42e-12	up	441	370	486	700	656	586	638	86	101	131	167	287	112	169	ENSGALG00000010733	3	35335865	35422784
ENSGALG00000026761	LIN28B	3	69096720	69176650	4.24621	1.66e-05	6e-05	up	20	18	15	9	4	4	2	1	0	0	0	2	0	0	ENSGALG00000005670	12	8760476	8836722
ENSGALG00000011133	LIN54	4	46614184	46634139	1.11842	2.01e-12	2.24e-11	up	377	356	316	267	295	272	345	72	92	90	148	172	127	126	ENSGALG00000006405	9	4675125	4677900
ENSGALG00000030321	LIN7B	AADN04010111.1	237	4065	1.1904	0.000103118	0.000323458	down	7	10	7	11	14	7	12	21	16	23	20	19	13	11	ENSGALG00000035625	2	97142592	97198921
ENSGALG00000001869	LINGO2	Z	68842898	68844718	2.21857	1.75e-10	1.43e-09	up	28	19	29	24	20	30	24	3	7	3	6	5	2	4	ENSGALG00000026151	20	1217950	1251928
ENSGALG00000006378	LIPA	6	19343210	19348438	3.19366	5.32e-27	5.41e-25	up	735	473	285	316	311	268	427	23	38	25	36	83	15	31	ENSGALG00000011177	1	42803231	42852341
ENSGALG00000043734	LIPG	Z	1062374	1068322	2.62752	1.08e-22	6.14e-21	up	919	831	450	555	393	1017	604	64	39	76	89	160	103	92	ENSGALG00000003955	8	6038908	6068762
ENSGALG00000015290	LIX1	Z	51552825	51581108	2.74617	3.23e-06	1.32e-05	up	28	45	22	11	14	15	15	0	5	5	0	0	2	6	ENSGALG00000008103	1	970622	978922
ENSGALG00000037665	LMBR1L	33	572817	577717	1.25206	2.04e-05	7.27e-05	down	30	28	18	17	15	25	27	15	36	36	67	62	58	33	ENSGALG00000020201	4	43989170	44001655
ENSGALG00000013377	LMBRD2	Z	10937324	10979527	1.75998	2.52e-11	2.33e-10	up	825	838	361	253	375	606	550	84	130	93	113	228	121	147	ENSGALG00000006639	6	20405524	20418860
ENSGALG00000014692	LMNB1	Z	56212816	56235773	1.83001	2.5e-19	8.18e-18	up	833	625	545	592	418	491	476	53	112	117	152	197	119	156	ENSGALG00000017201	1	185292875	185306204
ENSGALG00000000470	LMNB2	28	623375	649206	3.17423	1.63e-54	7.55e-51	up	1898	1567	1179	1087	1008	1109	1514	59	91	122	130	208	111	117	ENSGALG00000015283	3	67210434	67220885
ENSGALG00000036358	LMO3	1	63383606	63450107	1.24484	0.00552847	0.012339	down	32	24	27	22	19	140	48	145	89	129	61	48	45	64	ENSGALG00000006632	9	3662350	3680002
ENSGALG00000028721	LMOD1	26	1113766	1123749	1.19162	3.27e-10	2.54e-09	down	1756	1737	2357	3159	3158	3069	3217	5425	5382	6271	4040	4728	3322	4157	ENSGALG00000008787	3	9969192	9974236
ENSGALG00000018946	LMOD3	12	15361702	15364738	2.13322	0.0188579	0.0370846	down	1	1	0	1	0	3	2	0	9	3	6	8	0	3	ENSGALG00000012087	7	28426709	28436735
ENSGALG00000003479	LMTK2	14	1080575	1101282	1.92768	2.69e-11	2.48e-10	up	976	890	514	444	605	571	1034	72	131	66	200	332	130	154	ENSGALG00000015179	Z	37936454	37958205
ENSGALG00000015301	LNPEP	Z	51602732	51651196	2.56659	9.91e-36	3.33e-33	up	972	948	543	538	551	570	735	52	91	77	99	166	92	87	ENSGALG00000019336	1	45134394	45152813
ENSGALG00000013940	LNX1	4	66070910	66131999	2.35425	7.65e-19	2.34e-17	down	94	145	121	58	49	100	68	557	387	376	306	356	367	220	ENSGALG00000042624	23	222695	233308
ENSGALG00000016768	LONRF2	1	133106432	133137510	1.42701	9.81e-13	1.15e-11	up	257	258	207	173	253	203	285	51	49	50	83	122	83	52	ENSGALG00000014892	3	63018384	63155719
ENSGALG00000028063	LOX	Z	80979473	80988177	2.16327	1.11e-20	4.5e-19	up	636	316	291	492	453	590	728	41	90	89	131	113	64	101	ENSGALG00000004756	11	10100578	10120492
ENSGALG00000000402	LOXL2	22	1213671	1249445	1.21971	1.59e-18	4.55e-17	up	1081	839	721	1003	971	1244	1429	286	381	378	414	377	323	334	ENSGALG00000003540	18	6970209	6982733
ENSGALG00000013090	LOXL4	6	22249905	22254300	1.33032	4.12e-05	0.000139334	down	6	9	9	11	9	9	9	23	17	28	16	15	13	11	ENSGALG00000015342	1	85347660	85359894
ENSGALG00000009848	LPGAT1	3	22114003	22169314	2.10351	1.7e-07	8.64e-07	up	413	391	142	117	221	188	247	8	46	16	50	114	36	63	ENSGALG00000000142	26	1032399	1055596
ENSGALG00000016456	LPIN1	3	97873227	97919894	1.11529	4.47e-14	6.49e-13	up	134	103	117	134	144	100	153	35	36	47	52	57	48	51	ENSGALG00000005434	Z	31707297	31708392
ENSGALG00000014836	LPIN2	2	101279031	101315782	1.29249	1.26e-11	1.23e-10	up	1613	992	796	947	828	804	1051	193	347	194	392	453	331	408	ENSGALG00000004986	17	5472411	5483170
ENSGALG00000007337	LPP	9	14391788	14675571	1.06762	7.14e-07	3.27e-06	up	245	146	149	130	224	190	276	66	111	58	95	86	55	49	ENSGALG00000019397	1	16132582	16175969
ENSGALG00000010061	LRBA	4	33100940	33476202	1.12678	8.96e-19	2.71e-17	up	2384	2290	1946	1767	1704	1856	2184	517	724	584	750	1125	748	776	ENSGALG00000008910	7	14320425	14369336
ENSGALG00000007595	LRCH3	9	15098431	15134913	1.47391	2.66e-49	7.03e-46	up	366	411	347	470	379	338	452	88	117	111	114	143	102	120	ENSGALG00000003160	28	3746346	3756801
ENSGALG00000032308	LRMDA	6	14175060	14197870	1.54554	5.78e-06	2.26e-05	up	48	61	63	39	47	45	71	10	13	8	4	41	12	17	ENSGALG00000039141	25	2627873	2630268
ENSGALG00000033630	LRP12	2	130599464	130659121	1.61886	3.58e-15	6.17e-14	up	1825	2210	1416	1410	1833	1485	2108	243	416	298	587	846	369	506	ENSGALG00000014624	10	17297468	17341030
ENSGALG00000004853	LRP3	11	10195971	10217994	1.14216	6.56e-14	9.28e-13	up	1126	859	695	731	752	610	685	202	260	225	278	429	303	294	ENSGALG00000039734	33	274304	292648
ENSGALG00000031503	LRP6	1	71750243	71874216	1.8278	1.33e-17	3.37e-16	up	299	204	180	182	224	284	355	26	69	44	66	89	48	52	ENSGALG00000010902	7	19039829	19149307
ENSGALG00000010692	LRP8	8	24742974	24890035	1.25438	3.51e-10	2.71e-09	up	75	58	75	96	71	62	59	19	24	23	16	35	31	18	ENSGALG00000026741	4	53989695	53994661
ENSGALG00000043685	LRRC14	AADN04004326.1	4814	15225	1.19582	3.23e-07	1.56e-06	down	231	430	318	462	321	629	271	919	699	735	696	820	559	415	ENSGALG00000007510	4	11335869	11340302
ENSGALG00000030964	LRRC20	6	11521894	11524544	1.63844	2.34e-06	9.8e-06	down	32	7	34	61	39	35	15	113	85	102	70	62	61	49	ENSGALG00000014648	Z	59736248	59752830
ENSGALG00000046384	LRRC46	27	4226296	4229044	1.52821	9.82e-06	3.7e-05	down	6	8	5	14	8	9	5	18	21	25	23	18	8	13	ENSGALG00000001234	11	668620	674247
ENSGALG00000003443	LRRC52	8	5482024	5484083	1.44293	2.32e-10	1.85e-09	down	22	18	12	14	12	20	22	39	38	47	36	33	30	36	ENSGALG00000044610	12	10668759	10678545
ENSGALG00000033186	LRRC58	1	79909273	79920291	1.93482	1.35e-08	8.2e-08	up	378	358	158	200	258	269	588	21	75	32	73	161	54	59	ENSGALG00000021183	10	12159579	12164535
ENSGALG00000027351	LRRC71	25	1379511	1382395	1.78179	0.000143353	0.000438084	down	5	1	6	10	2	7	9	16	23	28	5	11	10	15	ENSGALG00000032634	11	476086	482603
ENSGALG00000028023	LRRC74B	15	10114261	10120033	1.02865	0.00454613	0.010336	down	2	8	5	11	7	11	9	14	17	15	9	13	9	9	ENSGALG00000012100	7	28481649	28499392
ENSGALG00000002631	LRRC75A	19	5071178	5115971	1.12151	1.66e-08	9.91e-08	up	189	152	151	138	218	204	291	51	68	53	55	104	65	102	ENSGALG00000037504	3	162951	180542
ENSGALG00000004573	LRRC8A	17	5843159	5848437	1.44243	5.2e-13	6.38e-12	up	769	792	609	523	648	557	832	92	158	150	239	332	222	218	ENSGALG00000043885	25	2533722	2536950
ENSGALG00000035099	LRRN1	12	18314289	18331017	1.29992	1.07e-07	5.55e-07	up	127	109	99	119	109	52	72	22	44	16	30	55	25	34	ENSGALG00000001261	18	2219939	2238454
ENSGALG00000040620	LSAMP	1	81944958	82236106	2.1983	8.34e-27	8.3e-25	up	139	92	106	134	112	164	167	25	16	21	24	36	18	19	ENSGALG00000009902	8	19691444	19711677
ENSGALG00000003245	LSM1	22	2293641	2294969	1.07467	1.8e-13	2.35e-12	down	141	172	181	214	234	192	158	339	310	342	293	265	328	277	ENSGALG00000008417	6	24289113	24342371
ENSGALG00000038954	LSM11	13	11299573	11303669	2.1136	9.51e-34	2.29e-31	up	105	99	93	102	97	99	116	16	11	22	24	22	20	16	ENSGALG00000008416	3	3831127	3921447
ENSGALG00000039803	LSM12	KQ759560.1	10484	16705	1.02685	1.17e-13	1.56e-12	down	307	382	402	388	368	378	340	641	602	741	492	480	585	594	ENSGALG00000034212	7	22451535	22466004
ENSGALG00000003385	LSM4	28	3982169	3987362	1.01446	6.58e-11	5.75e-10	up	725	690	595	570	540	623	543	158	232	150	275	379	245	281	ENSGALG00000002551	14	13130172	13153006
ENSGALG00000009446	LSMEM1	1	26908732	26912859	1.45419	1.07e-06	4.75e-06	down	42	18	37	38	46	45	65	115	97	68	148	60	37	107	ENSGALG00000001288	21	1856463	1897536
ENSGALG00000006583	LSP1	5	14053799	14092907	1.13911	2.9e-10	2.27e-09	up	4623	3677	4186	5201	3322	1884	2651	1399	1302	1349	1338	1301	1103	1391	ENSGALG00000003545	17	7034049	7055559
ENSGALG00000033709	LTA4H	1	45694933	45718500	1.67001	1.04e-21	4.8e-20	up	4603	4590	3175	3194	3434	2687	4002	504	961	686	972	1491	967	960	ENSGALG00000010611	4	39613075	39632176
ENSGALG00000032348	LTB4R2	16	21405	22499	2.11239	0.00192735	0.00474075	up	10	6	6	11	7	2	7	3	0	0	0	3	1	2	ENSGALG00000046316	27	3483420	3486566
ENSGALG00000037983	LUC7L	14	12317805	12324721	1.14193	1.31e-11	1.27e-10	down	786	964	1050	1111	1004	864	953	1730	1772	2540	1491	1247	1316	1617	ENSGALG00000015685	4	83181057	83225963
ENSGALG00000030151	LUZP2	5	1064703	1231569	1.28581	1.12e-07	5.82e-07	down	14	26	43	28	33	42	25	68	53	69	65	45	49	60	ENSGALG00000012623	Z	42420869	42425911
ENSGALG00000012801	LY86	2	65108627	65132418	1.74319	1.26e-14	2e-13	up	703	730	713	670	645	504	1099	135	220	247	180	78	173	157	ENSGALG00000040832	28	2853995	2861721
ENSGALG00000032701	LY96	2	118468953	118475495	1.22434	0.000213098	0.000629598	up	261	189	287	345	193	67	73	50	79	76	41	58	73	105	ENSGALG00000002853	11	2041059	2091973
ENSGALG00000004002	LYPLA2	23	5602159	5605993	1.20695	4.3e-14	6.26e-13	up	1283	1417	1238	1147	1216	1242	1451	314	447	251	457	759	462	472	ENSGALG00000012126	4	58493683	58506491
ENSGALG00000016001	LZTS3	4	89251924	89258225	1.09029	5.78e-09	3.71e-08	up	441	438	455	328	498	375	481	93	184	120	175	303	121	160	ENSGALG00000010027	5	35998920	36001763
ENSGALG00000045052	MAB21L1	1	173156430	173157809	1.47231	7.47e-15	1.23e-13	down	49	30	42	56	70	54	61	149	102	122	105	108	99	108	ENSGALG00000008240	7	11453269	11472335
ENSGALG00000010868	MACC1	2	29988269	30018558	2.11006	1.06e-07	5.51e-07	up	173	142	87	66	77	73	129	13	22	1	17	51	22	16	ENSGALG00000032986	1	24554513	24638605
ENSGALG00000000871	MADPRT1	1	194211172	194212413	1.94244	0.00221992	0.00539657	up	23	8	12	11	7	4	2	2	4	0	3	2	1	2	ENSGALG00000042020	4	50050413	50052876
ENSGALG00000032777	MAF1	AADN04005514.1	2433	10413	1.2586	5.7e-11	5.03e-10	up	2756	2464	2503	2863	2477	2035	2962	557	823	629	982	1786	709	647	ENSGALG00000015824	3	76866827	76876263
ENSGALG00000026264	MAFA	2	148778575	148780708	1.4278	0.0065557	0.0143888	up	45	25	13	28	9	5	13	2	3	8	3	14	8	3	ENSGALG00000015400	1	88778331	88781892
ENSGALG00000007861	MAGT1	4	12939224	12953049	1.00795	5.19e-10	3.9e-09	up	2345	1847	1795	1868	1696	2033	2073	460	873	433	889	1132	797	924	ENSGALG00000000920	25	2806615	2815037
ENSGALG00000023882	MALL	3	3067765	3070648	1.09379	0.000639229	0.0017288	down	40	23	24	13	31	54	47	55	65	18	72	75	68	46	ENSGALG00000004294	10	7259782	7315837
ENSGALG00000008498	MALRD1	2	18807653	19023102	1.02267	0.00525235	0.0117824	up	672	983	584	418	941	822	1200	139	297	70	348	885	289	275	ENSGALG00000021020	10	17836424	17838772
ENSGALG00000005929	MAML1	13	13518679	13527918	1.10017	2.54e-11	2.35e-10	up	640	523	427	486	448	402	544	112	186	131	243	290	180	164	ENSGALG00000012206	5	56570934	56581544
ENSGALG00000014878	MAN1A1	3	62648643	62791218	2.61128	2.57e-16	5.29e-15	up	1371	1712	741	778	1163	959	1304	48	151	50	218	313	135	169	ENSGALG00000006352	6	19330373	19331756
ENSGALG00000037375	MAN1B1	17	822820	841427	1.41472	2.89e-20	1.1e-18	up	2507	2505	1749	1682	1870	2278	2888	458	704	457	670	925	718	753	ENSGALG00000027874	5	24438649	24440766
ENSGALG00000000255	MAN2A1	Z	47154837	47271874	2.47406	5.62e-13	6.85e-12	up	1545	1357	752	643	873	1025	1253	57	111	42	188	380	153	178	ENSGALG00000008182	3	3043831	3054727
ENSGALG00000010741	MAP1LC3C	3	35808585	35810392	1.27226	0.00072379	0.0019374	down	19	5	7	23	23	25	23	54	24	40	30	28	13	48	ENSGALG00000011970	1	49788795	49792401
ENSGALG00000004370	MAP2K6	18	8052645	8088396	1.23029	1.76e-10	1.43e-09	up	117	118	90	79	93	71	119	19	35	37	25	41	31	47	ENSGALG00000001126	28	2531066	2545563
ENSGALG00000014718	MAP3K1	Z	17406003	17465113	1.34281	1.29e-13	1.72e-12	up	3665	3225	2496	2286	1715	1787	1682	547	825	648	729	993	798	808	ENSGALG00000016042	1	106660194	106677742
ENSGALG00000031572	MAP3K12	33	849526	856332	1.19062	1.44e-06	6.23e-06	down	23	15	27	32	38	29	30	58	48	77	39	46	32	50	ENSGALG00000016813	1	136898933	136901779
ENSGALG00000035237	MAP3K20	7	17433265	17496833	1.35234	3.17e-14	4.69e-13	up	612	406	663	697	674	733	954	154	165	187	205	350	188	246	ENSGALG00000002289	6	2918418	2949655
ENSGALG00000000525	MAP3K3	27	2906874	2941579	1.41256	1.36e-21	6.26e-20	up	376	353	262	302	358	299	465	72	103	79	131	140	90	114	ENSGALG00000028809	6	15918353	15920676
ENSGALG00000007356	MAP3K8	2	15017676	15034648	1.33658	2.36e-07	1.17e-06	up	165	125	112	143	82	65	84	18	27	31	23	49	52	46	ENSGALG00000028810	15	8014553	8015183
ENSGALG00000037326	MAP3K9	5	27302590	27346161	1.38583	7.67e-06	2.95e-05	up	21	56	43	31	57	37	47	7	20	9	20	13	14	7	ENSGALG00000002495	19	4888886	4892140
ENSGALG00000001501	MAPK1	15	505903	529524	1.81846	1.99e-20	7.78e-19	up	1325	1342	971	892	1078	1091	1316	128	208	208	295	481	238	292	ENSGALG00000006489	1	2002525	2187486
ENSGALG00000042833	MAPK14	26	139302	149917	1.59237	9.16e-32	1.75e-29	up	649	561	495	530	482	547	630	137	140	111	161	241	122	126	ENSGALG00000006328	12	10779098	10787668
ENSGALG00000029279	MAPK15	2	149271531	149287876	1.00728	9.9e-06	3.73e-05	up	47	55	59	61	55	47	92	18	29	14	36	21	28	19	ENSGALG00000030457	AADN04000744.1	15315	17687
ENSGALG00000039099	MAPK9	13	13942115	13962239	1.40504	5.94e-08	3.23e-07	up	469	346	239	285	300	330	451	67	87	41	181	177	77	112	ENSGALG00000006056	12	9779135	9881729
ENSGALG00000031726	MAPRE3	3	105024023	105028422	1.05236	1.13e-22	6.41e-21	down	520	552	625	706	667	583	650	1051	1024	1194	926	972	932	972	ENSGALG00000043676	2	111640095	111661399
ENSGALG00000009520	MARCH1	#N/A	#N/A	#N/A	1.19603	7e-08	3.76e-07	up	441	381	351	455	338	151	226	74	106	134	106	118	144	131	ENSGALG00000015038	1	80531090	80538489
ENSGALG00000012119	MARCO	7	28634162	28643201	1.46353	5.77e-11	5.09e-10	up	820	678	598	523	968	455	871	171	192	268	229	109	252	180	ENSGALG00000014642	Z	51274317	51349988
ENSGALG00000039815	MARF1	14	7570007	7591157	1.24461	3.14e-21	1.37e-19	up	1506	1371	1005	1032	1150	930	1369	280	397	361	470	529	344	457	ENSGALG00000006949	10	14615742	14681032
ENSGALG00000027140	MARVELD2	Z	73005632	73011865	1.02367	7.06e-06	2.73e-05	up	424	377	309	254	295	337	433	64	150	63	161	236	142	159	ENSGALG00000041080	2	113278112	113366083
ENSGALG00000014784	MAST4	Z	21007930	21294655	1.06203	3.51e-09	2.32e-08	up	813	707	387	447	583	670	614	184	201	171	287	350	193	246	ENSGALG00000039178	11	5117926	5162439
ENSGALG00000012541	MB	1	52054483	52058197	2.17838	0.0053356	0.0119504	down	4	1	0	4	0	1	3	2	13	10	10	9	0	3	ENSGALG00000005363	12	7220510	7234050
ENSGALG00000016412	MBOAT2	3	96358528	96449224	1.55245	1.26e-11	1.23e-10	up	254	160	120	122	142	176	231	56	34	37	59	60	25	57	ENSGALG00000042418	24	376425	380172
ENSGALG00000002954	MBTD1	18	5125936	5160288	1.21383	3.02e-20	1.15e-18	up	624	590	473	472	485	414	691	129	180	160	198	241	167	223	ENSGALG00000005695	15	7725718	7738830
ENSGALG00000032087	MC5R	2	96775912	96776889	1.09743	0.000770008	0.0020531	up	42	25	46	55	93	43	64	7	21	23	36	17	11	23	ENSGALG00000003824	28	4335588	4347393
ENSGALG00000000208	MCC	Z	45751049	45946263	1.53145	1.37e-30	2.21e-28	up	307	268	219	218	214	271	254	49	80	58	73	87	58	82	ENSGALG00000002180	15	1523742	1535728
ENSGALG00000006037	MCM2	12	9749558	9760977	1.01367	3.29e-17	7.81e-16	up	1664	1307	1673	1699	1265	1239	1149	473	521	462	539	745	625	602	ENSGALG00000010820	5	44953316	44963482
ENSGALG00000016676	MCM3	3	108001150	108010607	1.01411	5.43e-19	1.7e-17	up	1397	1059	1309	1416	992	1020	1040	378	381	431	490	569	485	523	ENSGALG00000046616	3	16844159	16908817
ENSGALG00000012348	MCM6	7	30817925	30831254	1.04841	1.33e-16	2.87e-15	up	1845	1392	1750	1939	1229	1225	1245	462	600	579	524	753	531	666	ENSGALG00000023760	26	5088652	5102917
ENSGALG00000014668	MCTP1	Z	57623925	57794587	1.37766	4.28e-09	2.8e-08	up	99	91	84	138	97	51	92	19	28	39	25	17	36	34	ENSGALG00000040956	4	12172864	12191651
ENSGALG00000030157	MCTP2	10	14990376	15085983	1.13445	4.77e-09	3.09e-08	up	523	868	550	463	526	371	722	115	187	237	243	248	228	211	ENSGALG00000013931	4	65887873	65908475
ENSGALG00000030377	MDFI	26	4904776	4905638	1.13365	2.37e-07	1.17e-06	down	35	24	37	55	51	56	53	78	91	98	87	52	65	68	ENSGALG00000006830	5	15151804	15252302
ENSGALG00000026838	MDFIC	1	25768091	25813067	2.21556	1.22e-30	2.01e-28	up	214	147	147	178	172	139	204	22	19	37	26	48	18	37	ENSGALG00000031100	AADN04001512.1	12541	23130
ENSGALG00000033894	MEA1	3	4280842	4281519	1.27817	6.96e-11	6.06e-10	down	144	224	284	247	210	296	188	380	305	570	484	361	424	550	ENSGALG00000031574	AADN04006046.1	7243	9931
ENSGALG00000001708	MED1	27	4561652	4572376	1.5595	2.11e-28	2.56e-26	up	1224	1248	976	934	990	796	1152	213	268	210	348	425	252	286	ENSGALG00000034976	AADN04002943.1	6399	13958
ENSGALG00000008238	MED13L	15	11625300	11802311	1.18809	2.57e-23	1.59e-21	up	1525	1678	1194	1229	1409	1231	1424	320	461	456	538	625	535	480	ENSGALG00000036407	AADN04002470.1	10473	13423
ENSGALG00000001978	MED16	28	2857547	2865980	1.01358	1.19e-13	1.6e-12	up	134	132	121	131	108	116	135	48	40	46	41	55	64	52	ENSGALG00000032887	AADN04001138.1	12852	14668
ENSGALG00000003204	MED22	17	7334678	7340953	1.02285	2.03e-13	2.62e-12	up	783	808	787	816	834	732	845	230	314	183	354	484	288	380	ENSGALG00000034411	AADN04006143.1	4321	6234
ENSGALG00000014645	MEF2C	Z	60313313	60436293	1.7086	3.4e-14	5e-13	up	249	178	150	177	107	119	125	18	43	54	39	39	34	43	ENSGALG00000029309	AADN04000971.1	8022	30303
ENSGALG00000014699	MEGF10	Z	56348594	56445910	1.70304	3.12e-08	1.77e-07	up	78	42	88	98	73	96	90	14	17	39	17	18	5	28	ENSGALG00000037794	AADN04001643.1	10499	11719
ENSGALG00000035634	METRN	14	13230598	13235706	1.27281	1.83e-08	1.09e-07	down	31	29	45	45	39	42	36	79	87	113	62	55	61	52	ENSGALG00000029472	AADN04000910.1	11479	14128
ENSGALG00000028354	METRNL	18	3125375	3145730	1.05065	1.08e-16	2.36e-15	down	648	584	668	778	759	783	789	1455	1273	1193	1116	1032	1082	1046	ENSGALG00000036754	5	16188985	16208253
ENSGALG00000003334	METTL11B	8	4976799	4993570	2.52192	0.000137433	0.000421313	up	14	9	2	8	13	9	24	0	3	2	0	1	1	4	ENSGALG00000037856	12	17238314	17341991
ENSGALG00000014799	METTL4	2	101479110	101500299	1.06003	6.05e-09	3.87e-08	up	158	154	133	182	137	92	116	37	43	44	66	68	69	45	ENSGALG00000006906	4	8597733	8666449
ENSGALG00000030776	METTL7A	33	135658	137592	1.45763	4.54e-13	5.64e-12	down	75	87	101	140	144	124	140	257	301	360	188	270	165	226	ENSGALG00000006161	11	18999513	19003219
ENSGALG00000030647	MFAP2	21	4407476	4411229	1.54527	4.34e-09	2.83e-08	down	105	57	85	114	95	136	111	325	276	291	206	106	136	269	ENSGALG00000040746	4	1536522	1543111
ENSGALG00000027471	MFAP5	1	75972581	75982809	1.35188	2.4e-05	8.46e-05	up	549	158	247	451	327	570	949	150	134	128	219	101	80	193	ENSGALG00000041883	AADN04001891.1	16113	18731
ENSGALG00000011444	MFHAS1	4	49810308	49830524	1.35549	2.29e-19	7.53e-18	up	762	736	669	867	845	1022	1082	197	260	227	343	407	213	236	ENSGALG00000015496	1	92870771	92882303
ENSGALG00000004523	MFN2	21	5503613	5512548	1.3695	3.61e-20	1.36e-18	up	940	905	537	574	729	707	895	180	243	203	242	338	225	214	ENSGALG00000002095	20	2196584	2218131
ENSGALG00000012442	MFNG	1	51290595	51300967	2.39152	1.79e-10	1.45e-09	up	75	105	71	77	52	16	43	9	7	4	7	14	14	12	ENSGALG00000043573	2	122037633	122051680
ENSGALG00000001777	MFSD11	18	4266172	4280924	1.63947	6.48e-14	9.19e-13	up	1227	1187	835	660	899	925	1218	134	228	175	262	515	233	276	ENSGALG00000013160	2	85916370	85925033
ENSGALG00000030780	MGAT4A	1	132359814	132435082	1.72623	3.08e-31	5.53e-29	up	654	661	471	520	454	387	565	92	119	116	106	169	156	140	ENSGALG00000026428	18	9428607	9434497
ENSGALG00000009803	MGST2	4	29603081	29611243	1.29361	7.29e-06	2.81e-05	down	159	230	204	146	252	320	187	335	963	212	227	437	326	503	ENSGALG00000000409	22	1264837	1273235
ENSGALG00000014974	MIB1	2	102774724	102842815	1.19793	1.28e-09	9.02e-09	up	642	714	577	598	602	539	617	107	166	130	275	359	199	286	ENSGALG00000009293	7	16782766	16862730
ENSGALG00000005540	MICAL2	5	8028138	8078046	1.18546	2.44e-11	2.27e-10	up	620	675	582	499	542	496	713	91	192	247	234	300	181	219	ENSGALG00000015720	1	99543952	99573128
ENSGALG00000017125	MICU2	1	178436419	178570966	1.16754	1.95e-08	1.15e-07	up	435	355	285	281	311	355	440	58	129	87	138	230	98	154	ENSGALG00000035461	1	187635761	187648339
ENSGALG00000038504	MID1	1	124632218	124725073	1.13776	6.93e-10	5.08e-09	up	304	212	133	197	134	172	210	56	67	62	65	103	62	81	ENSGALG00000008569	5	24528083	24545033
ENSGALG00000012144	MIEF1	1	50648770	50653831	1.79542	9.68e-20	3.41e-18	up	222	197	189	196	205	172	166	24	26	38	51	83	39	53	ENSGALG00000036477	2	126067	127352
ENSGALG00000008951	MIGA1	8	19002933	19036547	1.87598	2.67e-17	6.44e-16	up	189	179	115	129	162	160	208	20	22	27	51	63	34	34	ENSGALG00000012769	1	55625668	55645260
ENSGALG00000032342	MIGA2	17	5923595	5935776	1.40267	2.9e-10	2.26e-09	up	328	327	227	243	279	260	438	38	88	89	120	161	69	79	ENSGALG00000040823	2	145744634	145748003
ENSGALG00000005188	MINDY4	2	998427	1065818	1.08702	1.33e-15	2.44e-14	up	148	157	135	151	128	114	170	45	50	43	52	68	47	73	ENSGALG00000026983	9	15979705	15988790
ENSGALG00000003695	MINPP1	6	9679455	9696260	1.87806	2.49e-11	2.32e-10	up	104	126	52	82	79	120	95	20	19	6	21	42	19	18	ENSGALG00000008072	4	13563342	13605339
ENSGALG00000007102	MLEC	15	9239051	9248313	1.35491	9.54e-18	2.48e-16	up	2152	1829	1741	1950	1965	1910	2195	508	694	280	624	874	621	739	ENSGALG00000017308	1	195912297	195938222
ENSGALG00000001596	MLLT1	28	1663596	1689911	1.7882	8.22e-22	3.9e-20	up	537	536	464	467	370	359	460	60	93	79	111	201	109	96	ENSGALG00000010778	3	36525270	36778774
ENSGALG00000044125	MLLT11	25	2647719	2647970	1.23592	1.65e-11	1.58e-10	down	60	57	72	84	92	98	115	181	184	176	141	136	118	142	ENSGALG00000012894	1	57864325	57865725
ENSGALG00000015078	MLLT3	Z	34030583	34141800	1.32654	1.14e-09	8.14e-09	up	209	257	201	148	211	240	298	51	51	36	79	103	74	111	ENSGALG00000008365	5	23645484	23647187
ENSGALG00000002860	MLN	26	4573764	4579315	1.26341	0.0122454	0.0251805	down	16	26	4	2	46	11	16	15	45	13	61	39	36	28	ENSGALG00000009640	5	30084838	30086424
ENSGALG00000004397	MLXIP	15	5796666	5813999	1.54036	5.17e-12	5.41e-11	up	1182	865	624	600	646	508	991	128	161	140	266	365	206	240	ENSGALG00000009301	7	16865856	16875595
ENSGALG00000034960	MLXIPL	19	169275	184322	1.31903	1.68e-05	6.08e-05	down	1705	2313	2216	2034	2270	2576	4078	2605	4018	4674	8279	10521	2738	2080	ENSGALG00000022702	1	194820512	194824114
ENSGALG00000019061	MMP1	1	182507123	182513346	1.76797	0.00014038	0.000429495	up	70	26	25	32	38	96	31	5	30	5	6	20	6	5	ENSGALG00000016565	3	105513853	105518435
ENSGALG00000019063	MMP10	1	182479610	182486231	1.67377	2.93e-07	1.43e-06	up	176	139	236	129	254	183	335	35	59	17	98	31	82	41	ENSGALG00000003014	10	3561047	3566864
ENSGALG00000017184	MMP7	1	182581300	182585639	3.88656	5.15e-05	0.00017066	up	1034	738	253	70	28	263	26	2	7	35	0	19	48	18	ENSGALG00000005801	20	9071546	9090148
ENSGALG00000006992	MMP9	20	10773802	10777893	2.52197	1.22e-10	1.02e-09	up	245	467	158	263	129	157	64	10	38	20	13	42	43	44	ENSGALG00000003021	10	3569395	3580686
ENSGALG00000028304	MMR1L4	2	19570298	19596231	1.99208	4.7e-11	4.2e-10	up	374	321	146	215	251	99	338	58	31	80	42	31	41	59	ENSGALG00000015382	Z	53602820	53611857
ENSGALG00000011573	MOB1B	4	50422680	50456669	1.08537	3.31e-21	1.44e-19	up	380	342	274	327	347	296	398	97	125	106	137	182	114	133	ENSGALG00000004096	10	6597145	6637179
ENSGALG00000001856	MOB3B	Z	68630255	68662403	2.42131	3.19e-15	5.54e-14	up	65	74	51	37	46	61	63	4	7	11	7	20	4	7	ENSGALG00000015336	Z	52738695	52796833
ENSGALG00000013149	MOCOS	2	85073411	85199421	1.71479	3.03e-12	3.28e-11	up	157	104	82	73	76	77	123	24	21	12	22	41	28	21	ENSGALG00000014268	4	69390132	69394616
ENSGALG00000010051	MOCS1	3	28773127	28796654	1.79325	8.16e-12	8.25e-11	up	227	242	160	120	178	149	159	18	28	21	52	73	39	60	ENSGALG00000002707	25	1729683	1734477
ENSGALG00000014170	MOGAT2	1	194907004	194922632	1.24273	1.99e-06	8.41e-06	up	475	914	559	307	481	759	622	114	269	97	185	288	275	191	ENSGALG00000015384	Z	53616171	53626084
ENSGALG00000044151	MORN5	17	9192136	9205599	1.79952	1.9e-11	1.8e-10	down	16	24	28	25	45	28	19	63	93	116	56	57	72	54	ENSGALG00000003005	10	3543223	3555508
ENSGALG00000006933	MOSMO	14	8593572	8616488	1.09314	7.72e-06	2.96e-05	up	53	42	41	36	62	32	53	15	22	12	15	28	18	10	ENSGALG00000007899	9	15648455	15651873
ENSGALG00000028536	MPEG1	5	16906936	16909098	1.98576	1.81e-23	1.15e-21	up	3978	3822	2805	3790	3727	1894	2419	343	667	601	562	670	915	771	ENSGALG00000007906	9	15652611	15656841
ENSGALG00000034087	MPND	28	1364235	1368818	1.79959	1.93e-14	2.95e-13	down	57	93	115	105	139	162	138	319	317	493	324	226	237	312	ENSGALG00000008440	5	23993359	23994615
ENSGALG00000035580	MPP2	27	5615996	5621784	1.17949	3.18e-06	1.3e-05	down	18	20	36	47	27	50	39	68	74	80	51	47	52	52	ENSGALG00000016769	1	133160108	133175882
ENSGALG00000008398	MPP4	7	11571223	11590227	1.37924	2.09e-07	1.04e-06	down	116	173	146	123	113	92	92	239	271	448	195	110	244	239	ENSGALG00000030607	1	54437824	54592561
ENSGALG00000009581	MPP5	5	28995036	29040334	1.42065	9.98e-08	5.22e-07	up	549	465	334	330	471	471	570	46	106	75	166	268	170	142	ENSGALG00000004276	14	3145182	3146474
ENSGALG00000007408	MPP7	2	15445584	15567893	1.03184	2.68e-06	1.11e-05	up	144	60	92	142	123	133	175	37	47	40	62	74	43	37	ENSGALG00000029632	12	10472792	10492466
ENSGALG00000026239	MPV17	3	104982858	104987064	1.03234	0.000254922	0.000741449	down	51	28	58	56	68	30	42	119	72	104	85	52	50	50	ENSGALG00000009704	6	31900240	31917647
ENSGALG00000000461	MRC2	27	2576056	2597588	1.3318	4.08e-15	6.93e-14	up	2976	1953	2387	3121	3215	2443	3591	938	906	906	1255	655	633	884	ENSGALG00000034507	9	10685168	10685803
ENSGALG00000008597	MRPL2	3	4370411	4372480	1.14576	3.02e-20	1.15e-18	down	468	437	517	656	518	597	528	1051	1118	922	765	828	902	939	ENSGALG00000024056	6	11977809	11983312
ENSGALG00000041060	MRPL33	3	27714873	27720711	1.03113	8.77e-18	2.28e-16	down	537	526	588	661	518	582	561	1127	1018	901	787	807	910	869	ENSGALG00000000913	11	20162333	20168892
ENSGALG00000039783	MRPL57	1	178624378	178626374	1.00205	3.25e-16	6.61e-15	down	364	477	361	396	352	405	384	761	632	550	625	546	558	682	ENSGALG00000031375	1	130364434	130365888
ENSGALG00000007822	MRPL58	18	10708224	10710548	1.11581	1.6e-18	4.58e-17	down	288	320	395	446	318	366	314	620	731	623	561	509	582	583	ENSGALG00000004903	11	10629242	10799049
ENSGALG00000042941	MRPL9	25	2859730	2862714	1.03358	1e-16	2.2e-15	down	737	759	906	1058	940	791	846	1585	1658	1419	1173	1204	1399	1341	ENSGALG00000019489	2	104761260	104847802
ENSGALG00000038667	MRPS12	32	11859	12566	1.17554	5.03e-22	2.48e-20	down	149	142	181	173	213	170	203	340	348	246	273	341	330	340	ENSGALG00000026468	10	17570918	17630894
ENSGALG00000000456	MRPS21	25	2381558	2383158	1.18491	3.94e-17	9.22e-16	down	247	218	275	351	274	308	328	601	634	518	472	463	493	415	ENSGALG00000026899	Z	45139013	45283428
ENSGALG00000001792	MRPS34	14	14347521	14349444	1.42364	2.76e-13	3.53e-12	down	77	127	81	115	95	137	88	233	293	253	215	150	158	233	ENSGALG00000040157	14	6005683	6016988
ENSGALG00000001333	MRRF	17	9231374	9242855	1.01558	1.05e-22	5.96e-21	down	472	514	477	562	459	481	512	872	823	919	753	743	675	784	ENSGALG00000000632	11	19157097	19158770
ENSGALG00000012024	MRTFA	1	50007129	50093845	1.55573	1.02e-16	2.23e-15	up	1298	1122	859	1055	1094	906	1319	194	266	217	334	595	230	278	ENSGALG00000042129	25	1847674	1851786
ENSGALG00000003991	MRTO4	21	4666392	4668550	1.19465	3.28e-13	4.14e-12	down	127	198	209	263	154	169	186	400	262	321	297	341	374	368	ENSGALG00000003289	6	9321757	9344610
ENSGALG00000039294	MSL2	9	690837	703206	1.25769	5.57e-12	5.8e-11	up	482	450	368	387	369	325	371	71	91	113	170	210	112	164	ENSGALG00000013008	1	61050761	61052686
ENSGALG00000039615	MSN	4	132734	172589	1.08919	2.15e-14	3.26e-13	up	7758	6422	6840	8243	6077	4363	5517	2155	2836	3034	2260	2322	2026	2221	ENSGALG00000042309	5	306737	308485
ENSGALG00000014616	MT3	11	2182305	2183341	1.92827	1.69e-11	1.62e-10	down	62	187	78	85	164	89	160	252	679	373	336	256	213	419	ENSGALG00000035817	AADN04000952.1	25139	27615
ENSGALG00000028451	MT4L	11	2178884	2180407	1.44675	5.07e-08	2.79e-07	down	845	3012	1395	1115	1853	1297	2132	2566	5736	4386	3390	2915	2260	4298	ENSGALG00000005132	11	11332749	11335423
ENSGALG00000001639	MTF1	23	3552052	3564494	1.33714	2.88e-11	2.65e-10	up	415	400	296	246	325	239	414	69	84	69	115	187	110	114	ENSGALG00000029268	11	620353	626331
ENSGALG00000012412	MTHFD1L	3	48792857	48928383	1.25779	1.26e-15	2.33e-14	up	275	274	266	293	211	168	263	81	59	102	81	97	87	73	ENSGALG00000008302	10	20071069	20073569
ENSGALG00000001042	MTMR4	19	615601	657520	1.41379	8.17e-15	1.34e-13	up	1403	1720	1100	1067	1301	1052	1349	270	255	302	342	608	449	498	ENSGALG00000026674	10	3728160	3760952
ENSGALG00000017112	MTMR6	1	177109111	177128040	1.52488	1.56e-15	2.83e-14	up	422	380	357	360	412	322	459	45	117	81	109	197	97	121	ENSGALG00000003978	28	4433952	4437922
ENSGALG00000029724	MTURN	2	41508272	41517997	1.00736	4.66e-06	1.85e-05	up	50	60	46	62	36	56	52	11	19	19	24	31	12	29	ENSGALG00000034500	2	97484738	97493933
ENSGALG00000001709	MUSTN1	12	849847	853113	1.47269	1.25e-10	1.04e-09	down	42	41	41	81	79	75	71	205	154	106	119	149	95	116	ENSGALG00000026945	11	18614455	18616321
ENSGALG00000042661	MVB12A	AADN04000744.1	29313	34012	1.61792	4.53e-05	0.000151969	down	8	3	6	8	9	8	1	19	14	21	10	9	16	15	ENSGALG00000007358	10	17819516	17827876
ENSGALG00000046263	MXD3	13	10195351	10196257	1.11041	7.11e-14	1e-12	down	113	70	129	167	115	114	125	192	198	220	203	183	204	225	ENSGALG00000037011	28	3455934	3458135
ENSGALG00000016635	MXRA5	1	128366355	128384828	1.11327	8.19e-06	3.13e-05	up	3359	1700	1672	2742	2938	3791	4950	1209	1156	982	1750	700	769	1149	ENSGALG00000011372	5	49671417	49676602
ENSGALG00000024047	MYCL	23	5548134	5550962	1.00403	4.91e-07	2.3e-06	up	48	41	43	43	49	45	45	13	12	20	19	20	22	19	ENSGALG00000010390	5	39112817	39120080
ENSGALG00000013603	MYCT1	3	49611127	49630472	1.77175	1.8e-16	3.81e-15	up	83	81	76	73	83	90	108	12	22	15	29	21	9	32	ENSGALG00000014276	7	16979747	17000681
ENSGALG00000002907	MYL1	7	2770680	2788461	2.3208	0.00638211	0.0140528	down	4	0	4	2	1	0	0	8	9	3	4	19	1	1	ENSGALG00000030918	28	3101530	3108568
ENSGALG00000035086	MYL6	33	689661	693434	1.54849	1.04e-17	2.68e-16	down	15036	11495	14476	18958	15079	18432	18540	42372	39549	55317	29410	30883	28441	31441	ENSGALG00000002705	6	5238391	5248079
ENSGALG00000028567	MYL9	20	488107	494909	1.50297	2.02e-10	1.62e-09	down	15224	13281	19606	27779	23075	25187	31967	65772	51933	75891	39268	38623	34369	39668	ENSGALG00000027860	4	61334100	61340499
ENSGALG00000015898	MYO6	3	80736607	80807004	1.35774	6.32e-07	2.91e-06	up	1400	1665	616	577	953	1184	1605	186	335	218	422	678	342	368	ENSGALG00000002260	12	1870818	1875257
ENSGALG00000031450	MYO7A	1	193221562	193279711	1.61425	0.000489815	0.00135359	up	401	240	102	90	60	53	89	32	18	34	71	19	20	75	ENSGALG00000007354	15	9611096	9680292
ENSGALG00000016342	MYOM2	3	91089249	91163384	2.13913	0.00127124	0.00323749	down	11	6	1	1	29	10	30	57	62	4	103	48	12	25	ENSGALG00000013818	3	54137560	54139018
ENSGALG00000005226	MYOZ1	6	16010360	16025442	1.75009	0.0016939	0.00421699	down	1	5	4	7	2	0	3	6	11	16	6	5	10	4	ENSGALG00000000678	23	1422978	1425194
ENSGALG00000044427	MZB1	13	2436041	2437104	1.58945	0.000735277	0.00196502	up	261	160	304	495	144	75	64	20	37	73	10	125	61	77	ENSGALG00000042325	17	5618965	5638417
ENSGALG00000033889	NAA50	1	79210234	79230427	1.03526	2.1e-33	4.68e-31	up	2705	2505	2578	3020	2373	2340	2574	750	1066	791	1103	1324	969	1092	ENSGALG00000017025	1	170406831	170416268
ENSGALG00000023670	NAALADL2	9	18408660	18778560	2.33652	5.55e-14	7.94e-13	up	78	83	64	43	74	64	85	3	8	10	15	27	10	6	ENSGALG00000012659	1	53949473	53959022
ENSGALG00000037778	NAB1	7	59840	77654	1.14884	7.03e-26	6.2e-24	up	783	718	576	690	732	626	798	221	212	230	298	349	219	248	ENSGALG00000008325	5	23399012	23435075
ENSGALG00000031958	NABP2	33	713178	715643	1.11059	1.43e-12	1.63e-11	down	79	117	110	135	109	93	65	148	206	193	153	171	159	191	ENSGALG00000011511	5	50400209	50407920
ENSGALG00000033609	NACA	33	1612235	1622846	1.21115	2.87e-19	9.33e-18	down	1972	1981	2159	2576	1863	1900	1794	4410	3772	3943	3187	2850	3825	4015	ENSGALG00000005254	11	11595602	11598282
ENSGALG00000008098	NAMPT	1	14227437	14253838	1.2557	9.66e-07	4.34e-06	up	2702	1350	1229	938	932	958	1087	326	433	228	417	778	495	443	ENSGALG00000008352	10	20173863	20181914
ENSGALG00000027980	NANOS1	6	29993320	29994084	1.40912	1.61e-06	6.93e-06	down	15	14	15	46	38	29	29	70	56	52	56	39	35	82	ENSGALG00000015602	Z	63750886	63772563
ENSGALG00000015320	NANS	Z	52013137	52022024	1.3034	2.81e-06	1.16e-05	up	2283	1873	1398	1315	1640	1861	2344	365	1004	150	646	935	564	546	ENSGALG00000028664	25	1801173	1802313
ENSGALG00000001603	NARF	18	3519920	3531736	1.48487	1.3e-16	2.81e-15	up	384	474	253	258	313	258	319	63	100	97	87	142	72	90	ENSGALG00000038817	Z	43552761	43555632
ENSGALG00000040506	NARS	Z	367071	377774	1.05099	2.38e-12	2.62e-11	up	2015	1837	1412	1440	1450	1842	1579	433	678	410	667	971	668	699	ENSGALG00000011455	4	49948789	49949830
ENSGALG00000005472	NAT	11	16006630	16011068	1.27176	8.05e-06	3.08e-05	up	229	184	94	72	138	126	138	24	31	26	57	72	50	70	ENSGALG00000011645	7	26234588	26376380
ENSGALG00000033857	NAT8B	AADN04000623.1	98705	99529	1.23119	1.62e-17	4.08e-16	down	171	285	276	264	372	297	270	404	611	437	489	598	542	575	ENSGALG00000032647	2	44830189	44963998
ENSGALG00000038141	NCF4	1	51610637	51620775	1.44232	6.01e-06	2.35e-05	up	237	168	241	358	176	71	81	38	72	72	30	76	49	54	ENSGALG00000011690	5	52000022	52008032
ENSGALG00000002750	NCKAP1	7	2252338	2303003	1.25287	4.32e-15	7.33e-14	up	3765	3616	2693	2537	3154	3480	4047	729	1052	761	1314	1738	1051	1277	ENSGALG00000033116	AADN04002035.1	8168	14005
ENSGALG00000035386	NCKAP1L	AADN04001865.1	885	11808	1.25261	4.75e-05	0.000158368	up	1034	1000	1048	1342	757	331	455	194	214	536	155	282	296	294	ENSGALG00000006322	8	16020120	16033702
ENSGALG00000004570	NCOA3	20	6050774	6104515	1.48747	7.8e-37	2.83e-34	up	1017	912	716	735	801	702	876	152	242	221	255	305	217	259	ENSGALG00000002106	8	1330224	1344472
ENSGALG00000042750	ND1	MT	4050	5024	1.04012	3.66e-09	2.42e-08	down	52437	72989	87880	85654	63087	75635	66340	143226	113700	156770	82085	104190	95842	122683	ENSGALG00000041522	AADN04000612.1	17166	19058
ENSGALG00000037838	ND6	MT	16184	16705	1.38123	1.12e-09	7.95e-09	down	1176	1644	1745	1598	1255	1771	1162	4447	2726	4427	2001	2133	2792	2579	ENSGALG00000014695	1	77610132	77667963
ENSGALG00000016909	NDFIP2	1	153022585	153069258	1.08691	4.29e-12	4.55e-11	up	6133	5831	4728	4187	4469	4505	4445	1144	2307	1178	1794	2434	1879	2363	ENSGALG00000025804	9	15969989	15979634
ENSGALG00000004581	NDST1	13	13114617	13132620	1.13945	1.16e-29	1.68e-27	up	683	677	657	666	576	567	551	158	251	227	265	267	198	228	ENSGALG00000009674	4	25540500	25584149
ENSGALG00000012015	NDST4	4	56457165	56560412	2.42439	9.36e-21	3.83e-19	up	307	303	188	143	158	116	195	19	34	16	31	33	43	35	ENSGALG00000016607	1	124829102	124865370
ENSGALG00000008613	NDUFA1	4	16558265	16559157	1.31083	1.3e-19	4.45e-18	down	292	237	302	364	317	320	287	676	715	697	529	471	542	521	ENSGALG00000007234	4	9596403	9620915
ENSGALG00000039212	NDUFA13	28	3468756	3469830	1.21474	1.55e-22	8.52e-21	down	886	865	916	1036	998	1241	1256	2202	2210	1733	1719	1756	1816	1816	ENSGALG00000004590	21	5584913	5603825
ENSGALG00000040626	NDUFA2	13	944854	946306	1.28238	1.72e-19	5.83e-18	down	217	188	167	289	251	207	242	503	504	459	361	381	395	393	ENSGALG00000030826	14	12338071	12354779
ENSGALG00000025999	NDUFA4	2	26070096	26073822	1.08406	1.61e-14	2.51e-13	down	980	746	940	1191	907	1067	937	1902	1920	1876	1329	1376	1366	1564	ENSGALG00000026862	9	13990203	14000682
ENSGALG00000006073	NDUFAB1	14	6917279	6918800	1.01577	9.73e-14	1.33e-12	down	83	102	106	126	115	110	91	189	165	173	174	151	173	150	ENSGALG00000019114	1	146034759	146094044
ENSGALG00000028537	NDUFB1	5	44628424	44630940	1.01924	1.62e-36	5.55e-34	down	1024	1011	942	1147	1076	1044	1059	1847	1830	1469	1507	1680	1623	1816	ENSGALG00000009038	2	21763074	21763811
ENSGALG00000032595	NDUFB2	1	56974471	56975259	1.039	3.36e-12	3.61e-11	down	538	648	699	554	585	856	561	1280	1084	905	1113	902	965	1012	ENSGALG00000016043	1	106700853	106701560
ENSGALG00000038714	NDUFB7	AADN04011608.1	794	4566	1.09671	9.72e-22	4.54e-20	down	610	561	597	780	748	708	903	1241	1438	1189	1075	1247	1053	1093	ENSGALG00000025821	9	13972127	13978235
ENSGALG00000003625	NDUFS5	23	5350671	5351689	1.09521	2.55e-14	3.83e-13	down	702	699	823	959	926	1005	772	1901	1532	1235	1285	1294	1327	1382	ENSGALG00000006593	9	4121939	4128404
ENSGALG00000013191	NDUFS6	2	86261324	86266277	1.05389	1.69e-23	1.08e-21	down	222	203	230	263	247	287	242	431	395	365	368	394	425	418	ENSGALG00000023580	21	6395182	6397256
ENSGALG00000031565	NEBL	2	18298149	18490934	1.42268	0.000208216	0.000616651	down	7	11	10	7	8	6	7	21	7	26	20	25	13	7	ENSGALG00000007311	4	10991217	10993740
ENSGALG00000003309	NECAB2	11	2592486	2644422	1.19188	3.41e-12	3.65e-11	down	83	67	110	131	125	104	87	198	187	214	208	154	148	170	ENSGALG00000027634	3	50747981	50748640
ENSGALG00000039196	NECTIN1	24	4031766	4073048	1.78692	1.72e-10	1.4e-09	up	424	453	238	270	310	477	514	60	71	37	114	203	74	78	ENSGALG00000042123	4	49904521	49905204
ENSGALG00000012747	NEDD9	2	63303255	63323772	1.44692	2.67e-06	1.11e-05	up	3358	3662	2020	2114	2921	3374	4859	338	961	342	1094	1852	685	1486	ENSGALG00000022557	19	668452	670167
ENSGALG00000010314	NEK9	5	38205830	38228340	1.2544	4.64e-22	2.34e-20	up	1059	1185	986	1053	1166	1229	1273	253	358	336	454	574	299	420	ENSGALG00000030314	1	124992911	124993543
ENSGALG00000001774	NEO1	10	1742727	1938673	1.45322	6.89e-34	1.68e-31	up	1008	1041	850	876	1002	987	1046	210	279	206	322	420	245	327	ENSGALG00000001621	15	701150	702907
ENSGALG00000006361	NEU4	9	4746372	4748199	3.03835	0.000619477	0.00167907	up	1	1	1	5	97	47	66	3	1	4	2	2	4	5	ENSGALG00000039538	1	83174245	83183465
ENSGALG00000042534	NFATC1	2	56746642	56868269	1.73323	7.66e-13	9.11e-12	up	231	208	174	266	205	129	176	25	29	30	87	70	45	50	ENSGALG00000007167	14	9040484	9102868
ENSGALG00000007963	NFATC2	20	13405791	13471470	2.09594	2.84e-20	1.09e-18	up	299	280	211	165	216	126	197	33	30	57	28	50	46	34	ENSGALG00000030546	14	8455910	8461828
ENSGALG00000003396	NFATC3	11	3421759	3524368	1.34604	9.85e-40	5.21e-37	up	2194	1979	1562	1845	1631	1433	1913	429	584	506	551	751	511	632	ENSGALG00000013223	11	14241342	14248273
ENSGALG00000005441	NFIB	Z	31375078	31540795	1.27741	8.48e-12	8.57e-11	up	448	401	212	227	268	360	365	71	129	92	117	149	96	105	ENSGALG00000030969	2	43249990	43256640
ENSGALG00000015209	NFIL3	Z	44346752	44358514	1.27275	1.86e-12	2.09e-11	up	474	295	218	271	348	388	336	73	105	95	112	166	88	140	ENSGALG00000009826	4	29873452	29888948
ENSGALG00000043724	NFX1	2	55550682	55599682	1.353	9.68e-08	5.08e-07	up	390	446	348	320	257	301	476	64	65	59	184	198	99	138	ENSGALG00000029502	4	1837445	1842295
ENSGALG00000002556	NGF	26	4027896	4047968	1.1931	1.64e-06	7.04e-06	down	34	20	26	33	27	27	38	47	43	97	40	55	37	51	ENSGALG00000038789	17	905651	908217
ENSGALG00000035950	NGFR	27	3423153	3434589	1.69654	2.08e-14	3.18e-13	up	221	161	243	376	269	340	316	55	74	69	90	105	45	38	ENSGALG00000001262	23	2508971	2526376
ENSGALG00000025817	NHLH1	25	1241617	1246230	2.35903	3.7e-06	1.49e-05	down	2	3	1	4	2	4	4	8	11	24	13	6	5	14	ENSGALG00000016707	3	110100695	110163451
ENSGALG00000008946	NHLRC2	6	27592399	27623494	1.05902	7.99e-11	6.89e-10	up	439	377	234	267	286	279	349	100	105	104	161	168	99	122	ENSGALG00000016020	1	105984248	105989738
ENSGALG00000017037	NHLRC3	1	171228296	171236726	1.73224	2.5e-10	1.97e-09	up	426	429	261	230	262	311	458	27	59	50	107	150	82	109	ENSGALG00000003702	13	11235505	11283731
ENSGALG00000042079	NID1	3	37985677	38021480	1.3659	4.33e-26	3.93e-24	up	3753	3095	3359	4009	4344	4420	4979	819	1185	1368	1537	1378	1113	1276	ENSGALG00000004467	15	5855907	5907889
ENSGALG00000012989	NINJ2	1	60431752	60475878	1.40077	1.18e-08	7.21e-08	down	43	47	47	60	64	97	72	173	184	148	83	101	109	99	ENSGALG00000030450	19	2751696	2795240
ENSGALG00000030932	NKX2-3	6	22108747	22111384	1.14766	1.91e-09	1.32e-08	down	299	365	426	423	498	510	469	862	697	1046	882	566	549	622	ENSGALG00000009024	3	8504537	8527052
ENSGALG00000033278	NLRC3	14	12811777	12820369	1.16639	0.000558276	0.00152818	up	706	684	690	896	390	191	260	93	183	338	101	192	240	197	ENSGALG00000028438	7	11350773	11354753
ENSGALG00000043506	NMB	10	946417	949692	1.60545	0.000202282	0.000600711	down	12	7	7	11	30	22	28	59	66	15	66	22	18	37	ENSGALG00000029444	25	2173881	2182848
ENSGALG00000007305	NME1	18	10070304	10073843	1.06272	0.00441259	0.0100667	down	10	6	21	15	16	8	9	31	15	30	20	18	7	19	ENSGALG00000001362	10	2406129	2414549
ENSGALG00000020151	NMU	4	65450209	65461844	1.65204	3.01e-11	2.76e-10	down	160	115	213	161	436	220	258	627	618	334	678	585	573	514	ENSGALG00000006057	13	14125185	14134175
ENSGALG00000007714	NMUR1	9	15335713	15338548	1.37415	1.19e-06	5.24e-06	down	34	18	36	46	39	78	32	93	77	110	104	51	70	74	ENSGALG00000030719	5	45979330	45995515
ENSGALG00000014869	NNT	Z	13747364	13788623	1.16803	9.98e-15	1.61e-13	up	1824	1636	1183	1292	1401	1692	1870	353	573	436	598	883	521	560	ENSGALG00000006507	24	3030958	3068375
ENSGALG00000000693	NOB1	11	19281499	19283690	1.12786	4.47e-14	6.48e-13	down	447	600	620	586	646	475	483	1070	861	1110	838	753	1019	1010	ENSGALG00000016917	1	154459230	154467752
ENSGALG00000003114	NOG	18	6262764	6263435	1.22967	2.7e-06	1.12e-05	down	15	28	31	43	50	54	40	85	95	59	67	44	71	64	ENSGALG00000007981	10	19164334	19170698
ENSGALG00000015198	NOL4	2	107444685	107585379	1.27259	0.0017407	0.00432476	up	17	16	9	16	16	21	17	4	0	6	2	9	9	7	ENSGALG00000039606	3	91341696	91348290
ENSGALG00000041124	NOLC1	6	16769428	16778561	1.20433	9.28e-22	4.35e-20	up	1211	1176	1007	944	1013	970	992	237	314	313	368	523	384	420	ENSGALG00000008574	1	193059179	193069296
ENSGALG00000008177	NOS1	15	11357297	11386044	2.13387	7.63e-27	7.63e-25	up	253	181	257	208	321	309	263	50	26	39	65	63	38	46	ENSGALG00000013793	4	65497092	65522295
ENSGALG00000017235	NOX4	1	187793324	187896831	1.99956	2.06e-20	7.98e-19	up	91	124	97	77	98	126	173	18	20	23	28	22	22	24	ENSGALG00000007370	5	16996870	16999139
ENSGALG00000043555	NPNT	4	38830535	38858198	1.70333	4.73e-35	1.43e-32	up	437	692	527	600	532	416	502	112	124	149	123	120	118	161	ENSGALG00000029438	AADN04012782.1	4204	7030
ENSGALG00000004572	NPPC	21	5567066	5568801	1.1214	0.00644271	0.0141642	down	12	11	9	11	10	38	20	42	35	11	40	14	31	18	ENSGALG00000034934	26	92231	92863
ENSGALG00000017405	NPR3	Z	10035886	10086792	2.87395	2.09e-29	2.92e-27	up	247	203	150	154	204	329	352	14	23	15	36	27	27	38	ENSGALG00000013187	2	86064033	86093341
ENSGALG00000010983	NPY	2	31521047	31529071	2.09168	0.000198415	0.000590176	down	6	0	0	4	1	2	6	7	18	9	8	7	9	6	ENSGALG00000007289	10	17754044	17773794
ENSGALG00000009280	NPY2R	4	20701889	20706043	1.19182	0.00612789	0.0135575	up	8	13	19	16	13	15	11	5	3	9	7	1	1	7	ENSGALG00000010384	9	23697558	23701239
ENSGALG00000005923	NPY4R	6	17858148	17859281	2.45422	7.14e-12	7.29e-11	up	32	22	26	34	24	23	38	3	2	3	8	8	3	2	ENSGALG00000027453	4	76547444	76551210
ENSGALG00000021303	NPY7R	13	13328594	13333806	1.40334	0.000127822	0.000394332	down	9	8	14	14	16	38	28	51	64	20	43	33	33	24	ENSGALG00000009787	6	33305940	33313820
ENSGALG00000042095	NR1I3	KQ759474.1	15342	20169	1.14305	3.21e-08	1.82e-07	down	97	214	115	117	202	212	220	211	303	297	253	371	263	400	ENSGALG00000002346	23	4239190	4252716
ENSGALG00000015305	NR2E1	3	67649133	67664104	1.20313	0.0034626	0.00809835	down	3	4	5	18	6	5	9	10	12	20	14	13	6	16	ENSGALG00000002606	21	3489330	3523996
ENSGALG00000027907	NR2F1	Z	58375165	58383467	1.14312	1.75e-08	1.04e-07	down	96	85	88	130	121	187	147	255	204	266	232	185	164	183	ENSGALG00000037387	9	6212445	6381940
ENSGALG00000032992	NR3C1	13	17485533	17536237	1.24784	5.68e-19	1.76e-17	up	203	197	158	190	158	235	248	65	61	68	74	77	63	58	ENSGALG00000014674	1	77405765	77420676
ENSGALG00000008914	NRAP	6	27468288	27513634	1.39442	0.000522633	0.00143827	down	9	13	8	3	6	9	2	9	17	13	24	9	12	22	ENSGALG00000015326	Z	52040364	52055154
ENSGALG00000018942	NRGN	24	296326	299853	2.61691	0.00165586	0.00412949	down	2	2	1	0	0	1	0	5	5	8	1	3	5	2	ENSGALG00000003344	13	10407214	10414162
ENSGALG00000015681	NRIP1	1	98322194	98325661	1.27364	1.89e-08	1.12e-07	up	793	785	501	426	534	469	585	118	148	113	263	356	188	191	ENSGALG00000005139	19	7287318	7316659
ENSGALG00000008970	NRK	4	17270287	17365352	2.79565	1.45e-33	3.35e-31	up	2586	2034	1700	1804	1275	710	1119	117	172	222	175	244	173	191	ENSGALG00000043051	3	105644982	105652231
ENSGALG00000007140	NRP1	2	13886401	13992667	1.3048	4.06e-34	1.06e-31	up	1823	1352	1562	1647	1617	1565	1808	394	438	570	632	642	446	560	ENSGALG00000030877	14	12823397	12878801
ENSGALG00000008621	NRP2	7	12719089	12797247	1.20538	1.48e-27	1.68e-25	up	1770	1793	1724	2058	2023	1835	1884	509	530	799	727	744	524	696	ENSGALG00000005854	19	9493830	9524924
ENSGALG00000009107	NRXN1	3	6563215	7213964	1.01906	3.86e-14	5.64e-13	up	3441	3929	4081	4245	4515	3053	3925	1061	1839	1180	1977	1397	1401	1920	ENSGALG00000014904	2	102239603	102250566
ENSGALG00000003299	NSD3	22	2316115	2337687	1.10746	2.41e-23	1.5e-21	up	1170	1076	883	946	963	837	990	273	351	304	398	521	305	414	ENSGALG00000014853	3	61257934	61307258
ENSGALG00000007493	NSDHL	4	11324987	11335529	1.22113	7.34e-13	8.75e-12	up	932	569	670	566	646	858	702	163	194	177	274	374	267	264	ENSGALG00000016875	1	144317634	144391504
ENSGALG00000043439	NSMCE2	2	138835594	138962099	1.06	2.3e-23	1.45e-21	down	288	242	207	315	213	262	253	345	431	389	382	431	476	503	ENSGALG00000013229	1	66896905	66907097
ENSGALG00000040480	NSMCE3	AADN04000849.1	32287	34585	1.024	2.05e-18	5.76e-17	down	442	396	358	598	454	547	470	716	786	850	633	767	717	802	ENSGALG00000034430	11	15579864	15588773
ENSGALG00000004842	NT5M	14	4784016	4787649	1.86331	3.04e-38	1.22e-35	up	197	190	194	241	226	158	190	31	40	48	49	63	37	39	ENSGALG00000023937	4	2190975	2199735
ENSGALG00000012594	NTRK2	Z	40289647	40495033	2.0425	1.34e-13	1.77e-12	up	74	56	42	92	64	51	56	5	15	5	9	23	15	13	ENSGALG00000038494	11	15750288	15870668
ENSGALG00000005524	NTSR1	20	8418759	8463809	3.02352	1.16e-09	8.24e-09	up	63	25	22	45	26	180	100	8	3	8	6	5	5	10	ENSGALG00000035182	15	6537157	6542732
ENSGALG00000012662	NUAK1	1	53983409	54028357	1.45066	2.31e-27	2.52e-25	up	223	181	220	238	229	151	230	49	61	66	67	69	65	52	ENSGALG00000010481	8	22009350	22021841
ENSGALG00000000708	NUCKS1	26	2263742	2277078	1.29258	4.67e-34	1.2e-31	up	1289	1127	1009	1066	958	965	1080	256	296	364	361	470	316	390	ENSGALG00000028982	3	95396266	95400963
ENSGALG00000040879	NUDCD1	2	132583137	132607011	2.2401	3.57e-39	1.79e-36	up	353	435	336	317	303	253	395	40	38	55	66	90	51	67	ENSGALG00000015267	1	84593673	84663511
ENSGALG00000038299	NUDCD3	22	4668051	4680515	1.01581	1.56e-16	3.32e-15	down	331	367	393	503	412	430	406	809	618	645	593	643	567	675	ENSGALG00000000424	11	11584764	11595252
ENSGALG00000015268	NUDT12	Z	49859967	49870596	1.20234	4.39e-05	0.000147725	up	249	270	118	89	90	187	145	23	66	37	65	80	67	68	ENSGALG00000005251	11	11546671	11573359
ENSGALG00000005078	NUP210	12	5623599	5682682	2.03766	5.08e-17	1.17e-15	up	1189	904	888	1001	585	348	507	115	139	209	109	152	159	163	ENSGALG00000011490	2	40582217	40590962
ENSGALG00000014337	NWD2	4	70368616	70416569	1.38479	4.96e-07	2.32e-06	up	56	76	39	42	60	64	69	11	34	23	18	18	8	13	ENSGALG00000011488	2	40542630	40570356
ENSGALG00000016228	NYX	1	111996403	112002409	1.08327	1.84e-05	6.59e-05	down	17	20	23	11	19	14	20	37	30	34	32	20	31	24	ENSGALG00000011484	2	40502114	40538476
ENSGALG00000032534	OBSCN	2	2110152	2290343	1.48477	6.3e-09	4.02e-08	down	109	106	69	89	173	67	109	329	304	237	188	123	208	196	ENSGALG00000010149	3	30244395	30267117
ENSGALG00000011242	OBSL1	7	22179676	22195512	1.03119	2.12e-09	1.46e-08	down	125	146	103	160	175	169	175	328	220	172	269	212	230	272	ENSGALG00000002356	11	1571363	1573654
ENSGALG00000028560	OC3	1	48061738	48067659	1.08292	7.55e-08	4.04e-07	down	596	479	509	550	615	474	667	940	755	1352	893	475	937	1105	ENSGALG00000013697	2	92127902	92139467
ENSGALG00000016740	OCA2	1	130716873	130847582	1.42374	0.0230841	0.0444602	up	5	5	6	4	6	5	6	0	1	1	2	1	5	1	ENSGALG00000019514	2	92159866	92174170
ENSGALG00000035199	ODF1	2	129807868	129809672	1.40085	0.0243457	0.0466618	down	5	0	4	7	1	2	0	3	4	5	10	8	6	4	ENSGALG00000029793	11	6773495	6779373
ENSGALG00000001618	OGFOD3	18	3560689	3587092	1.16175	3.52e-06	1.43e-05	up	210	307	196	175	225	241	274	45	67	36	89	173	86	100	ENSGALG00000014136	4	67010756	67015296
ENSGALG00000015951	OGFRL1	3	82683136	82692296	1.17466	6.81e-05	0.000220496	up	81	114	91	63	84	74	104	19	29	13	28	75	39	18	ENSGALG00000007282	4	10960845	10962293
ENSGALG00000026736	OGN	12	3424659	3435067	1.33516	1e-10	8.52e-10	up	745	654	691	998	1125	795	1384	200	229	411	368	254	209	336	ENSGALG00000039826	1	131977565	131997623
ENSGALG00000004345	OIT3	6	11229214	11258833	1.36378	4.88e-19	1.53e-17	down	249	289	246	213	317	269	275	589	570	560	635	361	523	551	ENSGALG00000022704	1	194460896	194463263
ENSGALG00000043833	OLAH	2	20651231	20655965	1.07756	0.00993274	0.0209154	down	4	5	7	6	3	1	6	5	8	8	7	10	8	8	ENSGALG00000037644	2	123703762	123734221
ENSGALG00000016943	OLFM4	1	165561980	165586181	2.56769	1.03e-08	6.34e-08	up	11556	12157	10224	11610	7795	11038	7685	655	817	168	966	3044	2073	2286	ENSGALG00000035023	5	56598848	56605042
ENSGALG00000001956	OLFML3	26	3801699	3803416	1.09229	2.45e-07	1.21e-06	down	237	177	184	292	298	284	403	594	496	555	431	316	316	425	ENSGALG00000009308	3	17470843	17510779
ENSGALG00000028081	ONECUT3	28	2305068	2321940	1.57661	8.04e-07	3.65e-06	up	23	31	19	23	34	21	28	7	13	3	9	5	6	5	ENSGALG00000030269	3	17576337	17583720
ENSGALG00000041662	OPN4-1	4	37518222	37532248	2.08061	1.68e-09	1.17e-08	down	12	8	21	16	11	23	14	67	42	33	95	24	33	58	ENSGALG00000046299	23	234420	240335
ENSGALG00000003554	OPTC	26	5176853	5180319	2.6384	0.00217809	0.00530603	down	2	2	2	0	1	0	0	1	5	5	6	9	0	10	ENSGALG00000016945	1	165707166	165718950
ENSGALG00000044591	OR51E2	1	194624671	194625627	1.8554	2.19e-10	1.75e-09	up	63	92	53	85	63	49	48	5	7	25	19	19	11	14	ENSGALG00000041266	AADN04001212.1	17158	19578
ENSGALG00000004321	OSER1	20	5642720	5646265	1.0002	6.1e-19	1.88e-17	down	379	374	393	461	477	461	411	759	674	700	667	587	636	661	ENSGALG00000027777	28	2939717	2944158
ENSGALG00000037695	OSR2	2	128397892	128400726	1.40612	4.65e-06	1.85e-05	down	151	195	341	329	568	186	239	242	580	1092	527	624	570	617	ENSGALG00000005597	8	13438299	13460236
ENSGALG00000029837	OST4	3	104940625	104941375	1.53524	4.41e-30	6.63e-28	down	341	273	341	430	439	357	402	1011	955	772	693	808	907	775	ENSGALG00000007489	6	22140760	22149894
ENSGALG00000006208	OTOG	5	11990010	12080323	1.40544	0.000846903	0.00224037	down	8	4	3	9	7	6	8	19	12	25	13	11	8	5	ENSGALG00000008160	6	23400232	23499498
ENSGALG00000041744	OTOS	9	5214754	5217385	1.18372	0.0106002	0.0221469	down	11	1	7	3	7	3	3	10	4	11	12	9	9	8	ENSGALG00000029646	KQ759471.1	4752	13529
ENSGALG00000026744	OTP	Z	23139185	23144944	1.54551	0.00508555	0.0114471	up	22	8	3	7	16	12	8	2	2	2	2	8	4	1	ENSGALG00000002301	11	1472262	1525501
ENSGALG00000012869	OVA	2	67948051	67955623	1.58227	0.00725684	0.0157595	down	1	3	1	3	4	10	5	4	15	2	22	10	5	8	ENSGALG00000011494	2	40640429	40669624
ENSGALG00000011930	OVST	1	76345584	76430119	1.45678	7.56e-08	4.04e-07	up	51	42	36	47	31	34	25	5	13	6	11	18	13	12	ENSGALG00000010042	1	35724872	35814526
ENSGALG00000003138	OXTR	12	19319352	19323273	1.45779	1.01e-06	4.53e-06	down	83	76	110	198	192	263	267	578	487	298	309	377	231	299	ENSGALG00000011682	1	47800013	47869940
ENSGALG00000001573	P2RX1	19	3288227	3295581	1.03112	2e-07	1.01e-06	down	788	762	679	1008	1108	1586	1319	1873	2043	1961	1549	1336	1492	1462	ENSGALG00000034316	13	13852683	13864572
ENSGALG00000040479	P2RX3	5	17026285	17029387	1.49931	0.000771903	0.00205756	down	2	2	4	4	8	6	2	8	10	4	8	14	8	12	ENSGALG00000010333	4	35229458	35239169
ENSGALG00000004613	P2RX5	19	6626797	6639651	1.00993	0.00664231	0.0145565	up	1401	1320	1486	2118	523	422	411	196	344	728	224	446	531	547	ENSGALG00000013649	4	63562142	63581923
ENSGALG00000026902	P2RX6	15	10111425	10115007	1.25545	5.26e-05	0.000173982	down	14	26	16	57	24	49	46	81	69	80	61	43	49	50	ENSGALG00000003950	13	12034550	12041047
ENSGALG00000036470	P2RY12	9	23626222	23627536	2.34838	2.88e-07	1.4e-06	up	30	25	14	23	17	10	27	1	5	5	4	7	0	1	ENSGALG00000011402	7	22615902	22627525
ENSGALG00000042317	P2RY2	1	195388851	195390862	1.08276	1.53e-07	7.83e-07	up	66	42	49	57	57	46	41	17	17	21	24	20	12	24	ENSGALG00000003457	27	5156868	5161795
ENSGALG00000016687	P2RY8	1	129127235	129153159	3.82892	3.74e-22	1.9e-20	up	590	562	543	604	300	126	206	8	20	19	8	50	39	23	ENSGALG00000028638	1	76949287	76951004
ENSGALG00000039572	PADI1	21	159936	169669	1.75918	8.45e-07	3.82e-06	down	8	1	9	9	7	9	4	19	22	18	18	14	10	26	ENSGALG00000011343	7	22380057	22385865
ENSGALG00000034188	PAG1	2	121738030	121812585	2.65476	2.44e-38	1e-35	up	300	247	210	220	165	144	195	15	26	26	28	35	19	40	ENSGALG00000028471	3	16039436	16041757
ENSGALG00000006426	PAK2	9	4632558	4651108	1.61242	1.85e-22	1e-20	up	1408	1199	1039	1071	732	681	839	195	220	241	250	364	266	292	ENSGALG00000037511	3	76458678	76464108
ENSGALG00000008058	PAK3	4	13443252	13504827	1.23237	3.21e-14	4.75e-13	up	564	606	344	431	417	457	518	114	159	119	231	221	148	151	ENSGALG00000004120	23	5619783	5620838
ENSGALG00000015655	PALM2	Z	65592725	65702020	2.10575	2.67e-10	2.1e-09	up	59	30	31	47	50	48	64	2	11	12	6	4	8	18	ENSGALG00000008757	3	11329418	11335309
ENSGALG00000001895	PANK3	13	4684399	4691245	3.22354	1.61e-27	1.8e-25	up	1292	1153	642	476	774	679	1379	34	73	50	99	176	66	62	ENSGALG00000010649	3	33980472	34004143
ENSGALG00000039751	PANX1	1	185732435	185751184	1.17978	2.44e-08	1.41e-07	up	156	176	108	108	158	154	156	29	50	29	61	91	43	62	ENSGALG00000043285	27	5473787	5477716
ENSGALG00000021443	PANX3	24	304486	307744	1.27112	1.34e-13	1.77e-12	down	90	74	104	142	101	89	81	175	150	239	163	170	217	183	ENSGALG00000026207	5	16919059	16920630
ENSGALG00000007079	PAPPA	17	3545578	3713843	1.28089	9.8e-08	5.13e-07	up	62	108	72	60	102	85	94	17	31	43	36	26	17	22	ENSGALG00000028140	Z	8134644	8303354
ENSGALG00000016675	PAQR8	3	107984837	107987764	1.45434	8.1e-11	6.98e-10	up	419	307	202	251	261	338	513	74	87	56	142	142	74	98	ENSGALG00000009523	1	28757424	28995706
ENSGALG00000042645	PARD3B	7	12818948	13182726	1.87587	4.49e-14	6.51e-13	up	861	1065	587	545	788	833	1204	105	163	104	219	392	148	181	ENSGALG00000000653	26	1968416	1991975
ENSGALG00000007994	PARD6B	20	13684034	13696732	1.83129	2.06e-07	1.03e-06	up	365	315	167	116	170	243	329	27	50	12	76	108	74	44	ENSGALG00000007862	12	16927115	16996501
ENSGALG00000046187	PARP12	1	55786716	55800554	1.43653	1.24e-06	5.45e-06	up	1929	1184	896	796	856	630	1183	189	280	123	368	727	270	305	ENSGALG00000008263	12	17898685	18121966
ENSGALG00000032991	PARP8	Z	14799777	14872196	1.19766	1.28e-08	7.77e-08	up	132	110	102	79	55	104	91	35	39	22	32	46	24	38	ENSGALG00000017197	1	183531415	184134793
ENSGALG00000005438	PARVA	5	7919891	7948685	2.06532	7.49e-24	5.15e-22	up	1123	713	841	1021	963	1268	1405	117	154	149	262	365	179	193	ENSGALG00000007927	12	17581013	17682115
ENSGALG00000014201	PARVB	1	69178093	69234452	1.38975	5.4e-19	1.69e-17	up	206	190	215	216	169	210	223	49	37	79	78	62	58	71	ENSGALG00000003123	27	5427312	5436287
ENSGALG00000014203	PARVG	1	69243499	69258876	2.20456	1.08e-14	1.73e-13	up	384	313	300	339	212	117	172	20	33	59	33	49	68	55	ENSGALG00000011577	7	24545119	24814619
ENSGALG00000030944	PAX3	9	7888137	7948484	2.91856	0.00925378	0.0196399	up	2	1	7	12	5	2	0	1	0	0	1	0	0	1	ENSGALG00000001513	17	8830009	8862193
ENSGALG00000003429	PBX1	8	5221120	5325617	2.13552	8.43e-45	1.11e-41	up	793	792	636	717	891	710	1116	100	131	152	132	234	139	146	ENSGALG00000039725	2	51702847	51711650
ENSGALG00000016941	PCDH17	1	163446840	163527123	1.29056	0.000918633	0.00241025	up	10	13	16	14	29	27	38	6	12	6	7	6	7	4	ENSGALG00000034345	27	5473594	5474209
ENSGALG00000006822	PCDH19	4	5247920	5296040	1.95709	7.96e-20	2.86e-18	up	112	129	142	109	127	88	119	11	21	36	17	39	23	24	ENSGALG00000036791	1	132349515	132351842
ENSGALG00000033883	PCDH7	4	72050258	72300970	2.94091	2.03e-14	3.1e-13	up	44	37	60	61	40	21	35	1	1	7	4	8	6	4	ENSGALG00000030590	3	38606547	38607894
ENSGALG00000030118	PCGF1	KQ759550.1	38598	43278	1.10151	9.98e-27	9.82e-25	down	152	153	177	217	159	163	167	286	353	264	292	287	276	272	ENSGALG00000040910	8	24582578	24584656
ENSGALG00000018815	PCGF2	27	4423054	4428068	1.79467	8.16e-09	5.11e-08	down	10	18	12	17	11	36	15	40	44	79	46	53	32	35	ENSGALG00000028866	27	5386659	5389962
ENSGALG00000005901	PCMTD2	20	9283304	9289786	1.88871	4.38e-17	1.02e-15	up	457	391	369	372	463	494	680	34	90	91	119	172	104	96	ENSGALG00000013102	2	81330751	81479436
ENSGALG00000037835	PCOLCE	AADN04008257.1	2303	5761	1.53005	1.75e-15	3.15e-14	down	155	134	151	198	169	177	198	515	337	484	372	231	327	405	ENSGALG00000011068	7	20140771	20213740
ENSGALG00000022819	PCP4	1	108164030	108196164	1.60171	2.34e-10	1.86e-09	down	525	398	631	959	669	798	912	2466	1690	2521	1328	1251	969	1336	ENSGALG00000009920	5	34263828	34280520
ENSGALG00000014681	PCSK1	Z	57130825	57158645	2.04723	2.92e-08	1.66e-07	up	787	694	381	265	375	563	866	35	115	22	164	198	110	138	ENSGALG00000029893	18	9070562	9079282
ENSGALG00000033256	PCSK5	Z	37062725	37257739	1.80238	9.33e-09	5.78e-08	up	622	507	186	176	274	426	557	47	81	45	100	173	90	107	ENSGALG00000011114	3	40562297	40591407
ENSGALG00000031794	PDCD1LG2	Z	27691451	27694689	1.37406	7.39e-06	2.85e-05	up	708	531	361	254	177	297	197	63	146	84	84	182	143	88	ENSGALG00000016980	1	167776863	167806722
ENSGALG00000013783	PDCL2	4	65465008	65471305	1.1297	1.75e-05	6.31e-05	down	15	16	7	19	16	10	21	30	27	26	17	22	28	30	ENSGALG00000002603	11	1810719	1825379
ENSGALG00000039935	PDE1C	2	48353052	48628045	1.20687	9.63e-10	6.9e-09	up	130	65	103	141	149	136	161	32	38	47	56	55	37	41	ENSGALG00000042764	1	14570254	14754461
ENSGALG00000013143	PDE3A	1	64936305	65172126	1.0428	2.9e-11	2.66e-10	up	820	1060	545	582	846	672	1012	281	297	280	305	416	293	280	ENSGALG00000017035	1	170890094	170940234
ENSGALG00000014727	PDE4D	Z	18254057	18507779	1.15742	1.16e-09	8.23e-09	up	323	315	218	248	161	272	245	58	84	90	143	111	75	80	ENSGALG00000006156	14	6976888	6998527
ENSGALG00000004514	PDE6G	18	9235688	9237137	1.4975	6.11e-07	2.83e-06	down	8	13	10	9	10	5	17	27	21	32	15	24	19	23	ENSGALG00000032456	MT	8331	9014
ENSGALG00000013929	PDGFRA	4	65811116	65842656	2.15711	1.66e-20	6.57e-19	up	1475	1141	746	851	1119	1506	2029	191	223	198	385	174	157	256	ENSGALG00000003158	18	6362780	6367874
ENSGALG00000030613	PDGFRB	13	13256919	13269462	1.96746	3.71e-29	4.93e-27	up	608	542	528	541	510	546	547	72	99	141	125	190	87	72	ENSGALG00000005180	8	11178211	11316534
ENSGALG00000040070	PDIA2	14	12282289	12286205	1.37038	0.00125576	0.00320247	down	9	7	4	10	6	4	10	26	17	21	10	6	13	7	ENSGALG00000015908	3	81088530	81188721
ENSGALG00000026159	PDLIM7	13	10155464	10172647	1.09998	8.91e-08	4.7e-07	down	3012	2487	3830	5240	4637	4352	4838	8090	6984	10367	5751	6268	4836	5508	ENSGALG00000004286	6	11020202	11048579
ENSGALG00000005146	PDP2	11	11444091	11445695	1.46814	4.37e-09	2.86e-08	up	1002	1105	748	689	789	688	1066	116	221	115	371	470	219	288	ENSGALG00000037675	2	136894050	137014125
ENSGALG00000002690	PDPR	11	1843314	1860236	1.29391	1.27e-19	4.38e-18	up	437	387	370	351	335	357	459	101	125	103	117	215	121	103	ENSGALG00000029617	6	24133416	24173373
ENSGALG00000015313	PDSS2	3	68009247	68121125	1.23532	4.25e-12	4.51e-11	up	237	234	205	206	198	244	294	45	74	50	96	133	68	91	ENSGALG00000038311	7	6633230	6662722
ENSGALG00000016205	PDXK	1	110069292	110113597	1.21215	1.04e-06	4.63e-06	up	2611	2257	1701	1600	1945	2037	2383	328	654	314	750	1462	819	814	ENSGALG00000043584	3	83179142	83351003
ENSGALG00000020726	PDZD7	6	23074976	23078138	1.0064	0.0102858	0.0215608	down	6	14	11	10	11	3	8	14	17	16	23	9	4	18	ENSGALG00000009641	2	23601205	23640175
ENSGALG00000029095	PDZD8	6	29188800	29236630	1.77183	4.01e-14	5.86e-13	up	677	685	521	522	547	584	699	61	109	101	126	311	168	136	ENSGALG00000005797	20	9022635	9065766
ENSGALG00000015492	PDZK1	1	92516395	92522811	1.14696	0.00179697	0.00445082	up	1445	2049	870	613	1287	980	1025	104	364	161	405	1096	505	474	ENSGALG00000016292	3	87551101	87625448
ENSGALG00000002759	PEAK1	10	2987920	3016419	1.02143	3.25e-11	2.96e-10	up	1131	1070	711	1008	1151	1320	1511	378	379	363	491	664	394	458	ENSGALG00000038022	2	144646756	144875068
ENSGALG00000015419	PENK	2	111735940	111739272	1.2783	1.86e-07	9.41e-07	down	89	73	102	179	186	180	134	286	200	312	378	214	222	189	ENSGALG00000039411	4	37840437	37922607
ENSGALG00000019286	PEX26	1	62114295	62118050	1.1578	2.16e-08	1.26e-07	up	187	219	146	148	129	129	222	27	63	45	76	93	53	71	ENSGALG00000043223	19	3498587	3653964
ENSGALG00000040369	PFKFB3	1	3543236	3579756	1.42494	3.91e-06	1.57e-05	up	2387	1275	865	704	716	693	1261	153	276	256	576	518	368	223	ENSGALG00000010259	2	24735576	24796883
ENSGALG00000033271	PFKM	AADN04000745.1	31861	38101	1.45345	3.06e-08	1.74e-07	down	22	18	20	18	27	18	31	57	57	63	58	27	36	34	ENSGALG00000033420	AADN04000745.1	21	5551
ENSGALG00000011111	PGBD5	3	40452230	40516338	1.83671	0.00135135	0.00342549	up	9	8	19	11	6	10	4	4	0	1	3	2	1	4	ENSGALG00000030712	AADN04000776.1	11	7373
ENSGALG00000003435	PGC	26	4946918	4950939	1.47868	3.91e-06	1.57e-05	down	9	6	9	11	12	6	10	26	29	17	24	15	17	11	ENSGALG00000035584	7	578995	896831
ENSGALG00000015854	PGM3	3	78202202	78210827	1.07244	8.1e-11	6.98e-10	up	1576	1088	894	799	893	931	1073	274	472	329	546	419	310	423	ENSGALG00000036798	1	138793510	138903918
ENSGALG00000042080	PGPEP1	28	3975142	3979743	1.4357	9.71e-07	4.36e-06	up	247	299	140	141	215	166	230	29	40	30	71	144	60	62	ENSGALG00000016843	1	138904303	139053712
ENSGALG00000007022	PGPEP1L	10	16687258	16689210	1.06071	3.03e-05	0.000104757	down	30	51	56	40	34	32	23	42	61	101	45	55	70	68	ENSGALG00000038612	9	9384943	9430089
ENSGALG00000011898	PHETA2	1	49460280	49461035	2.12258	1.54e-22	8.48e-21	up	555	342	474	635	620	506	782	54	82	119	117	187	72	93	ENSGALG00000014952	Z	23905366	23975796
ENSGALG00000016375	PHEX	1	118890050	118981624	2.43031	7.21e-06	2.78e-05	up	27	28	17	15	28	32	33	0	4	2	16	3	1	1	ENSGALG00000008141	4	13955889	14009116
ENSGALG00000019802	PHLDA3	26	774639	775292	1.52513	1.06e-05	3.97e-05	down	6	8	6	10	24	7	12	19	25	33	19	29	28	14	ENSGALG00000008266	4	14111920	14151756
ENSGALG00000029264	PI15	2	118812721	118835079	3.00891	9.88e-39	4.46e-36	up	172	99	131	146	112	135	128	5	7	17	14	23	10	16	ENSGALG00000002546	17	7910288	8039020
ENSGALG00000039037	PICALM	1	190435635	190483701	1.54706	1.22e-10	1.02e-09	up	880	709	461	546	713	734	1024	89	166	160	239	410	164	185	ENSGALG00000031112	7	470717	578692
ENSGALG00000031853	PIGBOS1	10	7968924	7969340	1.30046	6.04e-10	4.48e-09	down	34	33	55	46	37	49	31	87	78	114	70	63	65	79	ENSGALG00000005974	7	6723053	6744124
ENSGALG00000015349	PIGG	Z	53222477	53335831	1.1562	3.54e-06	1.43e-05	up	605	626	243	281	248	537	358	82	180	153	146	222	127	144	ENSGALG00000039216	7	6764395	6790429
ENSGALG00000001219	PIGU	20	603732	624358	1.05746	1.88e-09	1.3e-08	up	414	388	367	352	397	354	472	82	158	92	185	258	139	157	ENSGALG00000003923	7	4808259	4861524
ENSGALG00000005547	PIK3AP1	6	16723978	16765056	1.37477	7.43e-07	3.4e-06	up	1428	984	1223	1725	757	452	649	207	242	204	252	519	468	338	ENSGALG00000015253	1	84257313	84344008
ENSGALG00000035773	PIK3C3	Z	3992964	4061554	1.26952	3.6e-15	6.19e-14	up	645	567	390	433	450	649	474	100	178	163	184	246	149	190	ENSGALG00000002298	23	4146476	4152419
ENSGALG00000002583	PIK3CD	21	3417403	3489188	1.34814	1.84e-07	9.31e-07	up	1622	1568	1519	1859	959	535	667	246	416	421	255	479	469	455	ENSGALG00000015970	3	83104826	83171007
ENSGALG00000008081	PIK3CG	1	14409032	14442571	2.28138	1.05e-24	8.01e-23	up	1148	1068	776	653	852	673	879	70	129	98	155	287	112	167	ENSGALG00000027526	23	4887092	4897385
ENSGALG00000014786	PIK3R1	Z	21646751	21656155	2.01654	1.09e-17	2.79e-16	up	369	245	180	194	164	175	158	19	31	44	53	58	43	47	ENSGALG00000005628	20	8532484	8564351
ENSGALG00000003878	PIN4	4	1689848	1690541	1.43258	3.36e-30	5.14e-28	down	336	327	374	429	373	459	343	872	981	784	682	699	833	811	ENSGALG00000033144	2	136471845	136490798
ENSGALG00000041139	PINX1	3	107328091	107339724	1.11804	3.97e-10	3.04e-09	up	117	86	88	110	94	94	99	32	52	17	33	55	30	36	ENSGALG00000037309	3	94124717	94144085
ENSGALG00000042492	PITX2	4	58157162	58171834	1.74287	2e-11	1.9e-10	down	66	27	95	116	133	86	68	272	164	246	231	198	229	218	ENSGALG00000014910	2	102313605	102405919
ENSGALG00000002645	PIWIL1	15	3348420	3365105	1.80075	0.00108941	0.00281314	down	9	4	10	1	8	9	11	17	19	61	7	5	14	18	ENSGALG00000038320	8	7754198	7786741
ENSGALG00000006120	PKD2L2	13	14423184	14430276	1.08937	0.00968696	0.0204513	up	55	44	36	57	39	116	85	6	34	4	26	39	13	46	ENSGALG00000011202	2	34025221	34060317
ENSGALG00000004689	PKN1	17	5761648	5773456	1.11717	1.29e-09	9.13e-09	down	210	251	283	253	291	223	333	494	444	663	491	332	345	380	ENSGALG00000008931	3	8983259	9052594
ENSGALG00000000299	PKP1	26	818283	850755	4.93206	6.75e-07	3.1e-06	up	26	25	15	5	3	5	8	0	0	2	0	0	0	0	ENSGALG00000002308	Z	72731136	72825323
ENSGALG00000012185	PLA2G12A	4	58508150	58511640	1.5003	5.39e-08	2.95e-07	up	189	175	149	111	181	201	234	18	29	28	69	89	60	64	ENSGALG00000028001	9	23888280	23892608
ENSGALG00000041787	PLA2G15	11	128183	135591	1.97619	3.44e-26	3.17e-24	up	966	847	668	695	851	458	764	88	139	111	199	234	132	176	ENSGALG00000007900	2	17759039	17762503
ENSGALG00000031894	PLA2G2A	21	4843753	4844858	1.40169	0.0116989	0.0241993	down	3	5	9	2	3	14	1	5	4	9	9	25	10	19	ENSGALG00000001572	10	2568308	2570032
ENSGALG00000011149	PLA2R1	7	21941750	21977517	1.35647	6.69e-15	1.12e-13	up	1437	1233	1035	1062	987	800	962	202	294	219	370	496	407	381	ENSGALG00000008867	4	16781124	16801305
ENSGALG00000006586	PLAGL2	20	10337414	10341404	1.53093	1.01e-21	4.69e-20	up	256	248	194	209	150	146	180	45	50	46	57	70	55	60	ENSGALG00000016922	1	155063078	155069210
ENSGALG00000005086	PLAU	6	15493644	15501817	1.11167	9.58e-10	6.87e-09	up	2137	1460	1606	1452	2456	1743	2144	575	722	730	837	393	697	817	ENSGALG00000006630	20	10441553	10446510
ENSGALG00000008875	PLCB1	3	14197437	14580122	1.16346	1.11e-13	1.5e-12	up	298	210	213	263	237	318	391	98	82	97	116	117	77	99	ENSGALG00000026279	4	67239245	67243039
ENSGALG00000045212	PLCD3	27	1507914	1513516	1.37428	1.43e-10	1.18e-09	down	161	290	278	310	292	271	351	786	567	778	536	467	458	375	ENSGALG00000034859	5	19405053	19411889
ENSGALG00000026687	PLCD4	7	22607784	22613295	1.29874	2.13e-11	2.01e-10	down	433	692	896	674	645	638	678	1057	1310	1975	1392	1563	922	925	ENSGALG00000002024	15	1049965	1057055
ENSGALG00000033507	PLCG2	11	15896527	15947034	1.89956	7.53e-19	2.31e-17	up	1013	937	697	900	642	405	691	90	135	190	182	263	114	166	ENSGALG00000005000	6	14824430	14830844
ENSGALG00000001207	PLCH2	21	1463927	1522836	1.21702	7.71e-06	2.96e-05	up	637	592	285	235	395	396	588	82	134	72	186	273	170	179	ENSGALG00000004500	8	6893322	7020404
ENSGALG00000015375	PLCXD2	1	88425958	88430283	1.16963	0.0011365	0.00292656	up	25	20	14	11	24	19	27	8	10	8	4	13	2	5	ENSGALG00000009153	25	1094514	1221737
ENSGALG00000014845	PLCXD3	Z	13020886	13111008	2.33869	1.41e-07	7.26e-07	up	18	10	22	25	29	22	12	2	2	3	2	6	1	6	ENSGALG00000006015	5	10392671	10409126
ENSGALG00000011646	PLD4	5	51870921	51883477	1.77833	4.04e-05	0.000136784	up	376	277	344	540	176	63	112	18	64	105	19	100	73	60	ENSGALG00000005357	9	5884665	5898926
ENSGALG00000008756	PLEK	3	11341790	11356873	1.19825	4.49e-05	0.000150641	up	414	210	353	314	183	86	152	71	81	129	64	102	75	69	ENSGALG00000003153	28	3739329	3744161
ENSGALG00000034548	PLEKHA1	6	31286915	31300955	1.42504	7.15e-11	6.22e-10	up	1988	1743	1217	1185	1363	1329	1753	232	395	256	561	852	443	473	ENSGALG00000005869	12	9103875	9122950
ENSGALG00000003349	PLEKHA2	22	2434910	2444309	1.67708	9.87e-19	2.96e-17	up	760	640	835	980	547	409	542	110	174	143	146	273	165	176	ENSGALG00000008144	1	984497	1001467
ENSGALG00000029679	PLEKHA7	5	11572159	11662366	1.10873	6.49e-05	0.000210983	up	1940	1665	962	872	1156	1390	1827	295	393	199	760	978	475	618	ENSGALG00000000404	10	10432652	10453886
ENSGALG00000011185	PLEKHA8	2	33992889	34013069	1.6771	3.32e-16	6.74e-15	up	265	203	163	135	146	131	214	40	46	27	38	73	48	44	ENSGALG00000004834	14	4767396	4781731
ENSGALG00000027476	PLEKHG5	21	579684	584242	1.02236	2.73e-10	2.15e-09	down	384	421	410	453	456	581	721	727	1079	789	907	669	707	656	ENSGALG00000011130	4	46590239	46598724
ENSGALG00000008479	PLEKHM3	7	12077100	12162229	1.15495	1.61e-08	9.62e-08	up	116	94	96	76	119	94	137	19	40	32	44	66	29	36	ENSGALG00000030843	2	115721754	115733087
ENSGALG00000023395	PLIN1	10	12822224	12826841	1.28277	0.000967907	0.00252831	down	182	99	111	70	74	34	49	46	92	290	161	334	159	134	ENSGALG00000014467	1	77151417	77154549
ENSGALG00000025896	PLPPR4	8	12223292	12251722	1.4162	1.92e-07	9.67e-07	up	141	71	85	146	128	197	210	48	30	43	49	57	17	48	ENSGALG00000007752	9	15417806	15431439
ENSGALG00000006097	PLXNA1	12	9911395	9995555	1.37017	1.7e-17	4.27e-16	up	1648	1433	1008	1132	1400	1321	1624	274	430	286	438	665	374	533	ENSGALG00000033385	7	4937587	4946839
ENSGALG00000006473	PLXNA4	1	2317554	2737972	1.5827	1.06e-17	2.73e-16	up	90	99	76	87	129	95	102	20	26	34	28	32	20	21	ENSGALG00000028636	9	5217892	5219143
ENSGALG00000039861	PLXNB2	1	20490162	20663084	1.16742	1.43e-05	5.25e-05	up	4739	4539	2325	2075	2787	3433	4970	675	1091	552	1457	2340	1469	1444	ENSGALG00000043336	33	1170371	1176837
ENSGALG00000011309	PLXNC1	1	45063944	45130477	2.75953	2.04e-30	3.22e-28	up	1165	1069	712	876	737	435	645	58	79	151	69	84	120	97	ENSGALG00000032250	33	746584	747208
ENSGALG00000035325	PMAIP1	Z	9445622	9446599	2.24775	1.57e-12	1.78e-11	up	141	80	68	50	47	63	52	11	14	5	7	17	13	18	ENSGALG00000038440	7	10227768	10237493
ENSGALG00000012757	PMCH	1	55426369	55427757	1.21662	0.000982224	0.00256137	up	32	11	29	33	13	12	19	4	5	9	9	10	8	6	ENSGALG00000041294	4	46749051	46756120
ENSGALG00000027281	PNMT	27	4647259	4653202	1.28008	1.89e-06	8.02e-06	down	15	11	25	14	8	17	15	32	36	23	23	23	36	30	ENSGALG00000015486	3	71736827	71742566
ENSGALG00000014569	PNPLA2	5	15758209	15779721	2.42973	1.28e-10	1.07e-09	up	603	493	232	229	334	232	541	12	55	26	73	153	44	46	ENSGALG00000004927	17	5520718	5524294
ENSGALG00000006009	PODXL2	12	9713350	9741287	1.64199	1.26e-05	4.64e-05	up	29	27	31	47	52	52	49	0	10	14	9	23	5	14	ENSGALG00000007185	15	9325624	9331792
ENSGALG00000016312	POLA1	1	117847142	118037119	1.27017	3.43e-25	2.77e-23	up	853	777	813	807	680	573	679	194	243	217	264	372	208	230	ENSGALG00000010197	5	37740605	37748157
ENSGALG00000014924	POLQ	1	79422423	79478850	1.30584	1.06e-08	6.49e-08	down	308	280	328	459	234	282	309	681	663	1003	473	326	495	605	ENSGALG00000006861	14	8518920	8522677
ENSGALG00000004947	POLR3A	6	13158194	13188974	1.06652	5.61e-12	5.84e-11	up	491	485	354	321	353	324	408	96	149	114	158	228	151	159	ENSGALG00000009082	3	12445300	12477141
ENSGALG00000010351	POMGNT1	8	21569702	21581998	1.67745	4.72e-20	1.74e-18	up	421	414	306	301	323	335	433	76	79	51	105	149	107	70	ENSGALG00000001184	11	614088	620331
ENSGALG00000006809	POU2AF1	24	4312184	4324263	3.14073	5.85e-08	3.19e-07	up	348	257	469	613	217	55	142	17	25	13	3	75	18	45	ENSGALG00000014144	4	67078880	67183662
ENSGALG00000015446	POU2F1	1	91662967	91748448	1.31239	1.51e-09	1.06e-08	up	85	69	67	60	85	44	67	16	22	25	26	34	16	15	ENSGALG00000004901	15	6589170	6627467
ENSGALG00000043072	POU6F1	KQ759546.1	6583	15874	1.42139	2.52e-10	1.99e-09	down	31	31	55	65	53	34	56	128	91	128	88	80	74	95	ENSGALG00000001933	Z	70482714	70527115
ENSGALG00000042851	PPARGC1A	4	74475027	74593998	1.00522	0.000780608	0.00207807	up	201	118	88	130	127	111	160	18	36	31	66	127	46	57	ENSGALG00000008043	10	19231702	19258499
ENSGALG00000005849	PPDPF	20	9221057	9223364	1.25457	4.86e-07	2.28e-06	down	1394	1016	2060	2146	2501	3279	3348	4350	3644	6416	4163	4012	3764	3254	ENSGALG00000028949	19	6079158	6083665
ENSGALG00000034630	PPIL1	26	1179032	1180779	1.05131	2.94e-09	1.97e-08	down	154	134	192	272	228	218	172	378	450	304	263	285	288	283	ENSGALG00000038325	14	12750528	12788624
ENSGALG00000005061	PPM1E	19	7162889	7171399	1.45857	2.75e-08	1.58e-07	up	98	78	71	99	140	95	167	35	20	25	39	52	13	34	ENSGALG00000017644	11	17047246	17065341
ENSGALG00000039121	PPM1F	15	474490	479338	1.27592	2.63e-10	2.07e-09	up	115	80	82	81	78	82	121	15	26	32	45	38	31	24	ENSGALG00000032142	MT	6645	8192
ENSGALG00000009805	PPM1H	1	33089980	33218417	1.67044	1.35e-13	1.79e-12	up	195	181	142	128	147	148	192	19	27	44	55	75	27	41	ENSGALG00000001375	18	2633967	2730807
ENSGALG00000001605	PPM1J	26	3558025	3564463	1.59621	1.42e-08	8.57e-08	up	408	242	262	266	190	111	117	41	64	80	35	58	76	65	ENSGALG00000027190	18	5908066	5910865
ENSGALG00000011266	PPM1K	4	47319602	47333131	1.86393	6.95e-25	5.4e-23	up	296	309	231	296	269	219	244	43	85	59	54	86	26	60	ENSGALG00000033441	33	293423	293953
ENSGALG00000041575	PPP1R14C	3	48472735	48523004	1.39255	8.85e-08	4.67e-07	down	39	41	59	113	70	113	75	170	174	218	115	150	107	123	ENSGALG00000007465	6	22089099	22093085
ENSGALG00000044406	PPP1R1B	27	4622928	4626326	1.26735	2.92e-17	6.98e-16	down	511	415	551	633	668	658	884	1044	1373	910	986	1487	1367	1146	ENSGALG00000020449	5	27534217	27573025
ENSGALG00000008896	PPP1R1C	7	14159350	14200241	1.21189	0.000302481	0.000868655	down	36	7	20	21	8	15	21	43	40	45	28	25	30	21	ENSGALG00000014981	1	80152053	80153980
ENSGALG00000035913	PPP1R27	18	10006827	10008386	2.33866	0.00117118	0.00300958	down	2	1	0	3	0	1	2	6	6	3	1	8	9	3	ENSGALG00000011626	4	51055715	51060531
ENSGALG00000021220	PPP1R3D	20	7060118	7061480	2.09616	1.13e-23	7.49e-22	up	58	61	61	74	75	59	72	7	12	11	14	15	15	12	ENSGALG00000027698	14	2235667	2237645
ENSGALG00000043150	PQLC1	2	56364727	56400143	2.24862	1.23e-26	1.2e-24	up	135	137	103	107	113	124	172	12	20	17	25	41	20	16	ENSGALG00000027440	3	34811185	34814928
ENSGALG00000037521	PRCP	1	189067272	189093580	2.84606	8.94e-47	1.5e-43	up	1308	1229	1223	1269	1407	615	1045	70	138	162	156	161	121	93	ENSGALG00000035334	MT	9923	10706
ENSGALG00000036728	PRDM16	21	1025570	1224055	1.38065	9e-05	0.000285234	up	46	39	26	30	20	25	25	4	8	13	18	14	4	4	ENSGALG00000005749	11	17841429	17845559
ENSGALG00000038372	PRDM8	4	45634033	45635898	1.14802	0.00124395	0.00317673	down	21	10	19	11	14	9	15	42	12	36	28	19	20	14	ENSGALG00000014121	10	2324791	2329032
ENSGALG00000004621	PREX1	20	6385508	6529830	1.66406	3.67e-20	1.38e-18	up	1302	1244	1064	1380	964	575	846	205	236	338	231	258	285	291	ENSGALG00000033446	AADN04001130.1	21902	22402
ENSGALG00000020392	PRIMA1	5	45350875	45393576	1.05987	0.00223657	0.00542919	up	20	23	27	51	79	73	78	15	13	17	25	19	24	21	ENSGALG00000007205	15	9341601	9342871
ENSGALG00000014832	PRKAA1	Z	12893167	12913220	1.00774	1.26e-06	5.5e-06	up	1698	1433	894	816	864	1428	1063	294	521	282	571	710	433	504	ENSGALG00000035996	2	128895042	128900734
ENSGALG00000011360	PRKAG3	7	22546135	22550264	1.39958	0.0105608	0.0220747	down	5	2	4	5	3	2	2	11	13	2	5	6	9	2	ENSGALG00000015906	3	81074319	81077654
ENSGALG00000007023	PRKAR2A	12	11759446	11808025	1.01363	2.57e-19	8.4e-18	up	833	859	704	726	835	657	809	231	291	283	309	464	294	288	ENSGALG00000037996	3	23961824	23966667
ENSGALG00000008060	PRKAR2B	1	14466581	14547811	1.4319	1.55e-16	3.31e-15	up	142	112	107	174	112	140	144	20	35	33	48	58	36	47	ENSGALG00000007863	4	12954123	12956648
ENSGALG00000037943	PRKCB	14	6697241	6772052	1.23662	3.98e-07	1.9e-06	up	1116	824	1066	1417	692	456	595	244	255	481	207	349	255	275	ENSGALG00000027963	Z	61235075	61238711
ENSGALG00000034970	PRKCQ	1	3665779	3701334	1.79435	7.42e-12	7.56e-11	up	668	522	458	532	298	191	207	67	94	123	82	104	101	88	ENSGALG00000030773	9	23993439	24010099
ENSGALG00000010612	PRKD3	3	33628704	33666347	1.71289	1.21e-31	2.25e-29	up	548	383	462	506	443	269	386	90	98	117	95	121	97	110	ENSGALG00000008087	1	965365	969129
ENSGALG00000003805	PRKG1	6	9868124	10254176	1.69557	9.25e-17	2.05e-15	up	474	353	485	661	609	633	725	87	110	132	140	269	105	141	ENSGALG00000008048	1	952077	958465
ENSGALG00000042759	PRKX	1	128155790	128206843	2.08948	2.3e-20	8.88e-19	up	307	241	196	184	169	211	284	31	29	29	40	91	37	46	ENSGALG00000027296	1	960181	964481
ENSGALG00000040716	PRLH	7	4774972	4775907	1.01079	3.36e-05	0.000115189	down	117	114	167	87	120	84	40	135	171	200	210	197	129	140	ENSGALG00000041918	2	115888641	115975593
ENSGALG00000015409	PROS1	1	89665016	89695407	2.19918	2.74e-87	5.07e-83	up	1737	1578	1593	1535	1989	1678	1588	239	263	308	362	303	228	336	ENSGALG00000006834	9	12454619	12470944
ENSGALG00000006700	PROSER2	1	6195950	6208354	1.70534	3.02e-12	3.27e-11	up	372	438	239	256	318	375	439	40	63	60	92	181	73	102	ENSGALG00000016985	1	167990706	168006288
ENSGALG00000044352	protein_coding	1	139824921	139826272	3.34731	0.0260316	0.0495034	down	0	0	0	0	0	0	0	3	1	3	0	0	2	1	ENSGALG00000004295	19	6246344	6269003
ENSGALG00000046334	protein_coding	24	4926068	4928841	3.38187	0.0182037	0.0359201	up	1	0	3	4	5	0	4	0	0	0	0	0	0	0	ENSGALG00000027788	4	24041687	24088456
ENSGALG00000004475	protein_coding	4	1210009	1212138	2.97124	0.00639108	0.0140709	up	3	1	2	3	1	2	5	0	0	0	0	0	1	0	ENSGALG00000002150	10	1264586	1290224
ENSGALG00000037004	protein_coding	AADN04000792.1	13942	26710	2.98454	0.00611808	0.0135391	up	1	1	2	2	3	4	4	0	0	0	0	1	0	0	ENSGALG00000014516	4	77403388	77451937
ENSGALG00000044950	protein_coding	10	2272785	2274335	3.82166	0.024752	0.0473375	down	0	0	0	0	0	0	0	3	0	7	0	3	1	0	ENSGALG00000006912	6	20843233	20919088
ENSGALG00000044672	protein_coding	AADN04002278.1	8013	10078	2.83171	0.0234279	0.045066	down	0	0	1	0	0	1	0	2	0	3	2	5	1	0	ENSGALG00000033512	13	9433355	9465773
ENSGALG00000030128	protein_coding	2	141470034	141488999	2.86389	0.0117774	0.0243482	down	0	0	0	0	2	0	0	4	2	2	2	1	1	1	ENSGALG00000015332	Z	52264712	52364226
ENSGALG00000002111	protein_coding	14	13364535	13374948	2.57076	0.0114523	0.023737	up	3	2	3	2	2	2	3	0	0	0	0	1	1	0	ENSGALG00000026446	10	2350395	2352853
ENSGALG00000045071	protein_coding	AADN04003464.1	13460	15561	3.14753	0.00831484	0.0178477	up	5	5	1	0	4	1	3	0	1	0	0	0	0	0	ENSGALG00000038426	Z	937592	940719
ENSGALG00000037512	protein_coding	AADN04004636.1	5995	9408	3.05517	0.00486687	0.0109977	down	0	1	0	0	1	0	0	3	3	2	3	2	2	0	ENSGALG00000009945	1	35315781	35347355
ENSGALG00000043369	protein_coding	AADN04015825.1	21	5305	3.26961	0.0047191	0.0106912	up	1	3	2	7	4	0	4	0	0	0	1	0	0	0	ENSGALG00000007090	6	22028326	22034788
ENSGALG00000044324	protein_coding	AADN04012472.1	1582	6518	2.32238	0.0212041	0.0411691	up	3	2	3	2	2	4	3	0	1	0	0	0	0	2	ENSGALG00000040856	20	1081475	1127448
ENSGALG00000045569	protein_coding	KQ759454.1	25150	39757	2.3769	0.0214517	0.0416149	up	2	1	1	5	3	2	6	0	0	0	1	0	1	1	ENSGALG00000001316	11	713260	752424
ENSGALG00000044573	protein_coding	1	167810540	167829768	2.35073	0.0187516	0.0369148	down	0	1	1	0	0	0	2	3	1	4	3	1	2	2	ENSGALG00000035561	2	123675047	123692295
ENSGALG00000046598	protein_coding	5	39027631	39028922	3.34681	0.00686835	0.014995	down	0	0	0	1	1	0	0	2	7	3	0	6	0	1	ENSGALG00000029235	2	42068943	42280951
ENSGALG00000041074	protein_coding	3	4302340	4303164	2.93415	0.0118417	0.0244591	down	0	0	1	0	1	1	0	1	0	5	1	1	8	2	ENSGALG00000030676	26	1183181	1189514
ENSGALG00000041249	protein_coding	5	246787	247800	3.01235	0.0113103	0.023469	down	0	0	1	0	2	0	0	1	2	9	3	1	3	0	ENSGALG00000000507	11	18986242	18989246
ENSGALG00000044571	protein_coding	LGE64	860805	863701	3.49915	0.0155161	0.031128	down	0	0	0	1	1	0	0	2	0	0	7	0	10	1	ENSGALG00000007025	1	15507104	15601794
ENSGALG00000046209	protein_coding	AADN04004552.1	1800	3758	4.07273	0.00809257	0.0174191	down	0	0	0	0	1	0	0	0	15	1	0	5	3	0	ENSGALG00000036406	12	11480811	11486287
ENSGALG00000041240	protein_coding	AADN04000908.1	10493	11068	3.25041	0.00762994	0.0165078	up	7	11	4	2	1	2	0	0	0	0	0	0	2	0	ENSGALG00000008516	7	12407009	12420281
ENSGALG00000042362	protein_coding	AADN04000639.1	23112	60638	2.3288	0.0176347	0.0349241	down	2	0	0	0	2	0	1	1	0	3	3	3	5	5	ENSGALG00000040854	14	263760	303205
ENSGALG00000043374	protein_coding	27	668377	668862	3.30246	0.00247952	0.00597195	up	2	14	1	2	2	4	3	0	0	0	0	0	1	1	ENSGALG00000030866	2	127544122	127708621
ENSGALG00000040004	protein_coding	1	48197196	48197722	2.39065	0.00648272	0.0142404	down	1	0	1	0	0	1	2	1	2	4	5	3	2	4	ENSGALG00000002944	7	2817507	2918510
ENSGALG00000040950	protein_coding	KQ759533.1	29651	32875	3.81382	0.00467409	0.0105996	up	9	1	9	2	9	0	0	0	0	0	1	0	0	0	ENSGALG00000010783	5	44630916	44644426
ENSGALG00000044363	protein_coding	AADN04001788.1	14993	16188	2.86478	0.00356494	0.0083146	up	3	2	3	7	4	2	7	0	0	2	1	0	0	0	ENSGALG00000016424	3	96606819	96624780
ENSGALG00000044225	protein_coding	4	71008301	71010117	2.93184	0.00881091	0.0187861	up	8	9	3	4	4	1	0	0	0	0	0	1	0	2	ENSGALG00000004714	14	4407002	4413387
ENSGALG00000031230	protein_coding	AADN04006010.1	3737	8532	4.22947	8.47e-05	0.000270078	down	1	0	0	0	0	0	0	1	4	3	4	1	2	11	ENSGALG00000019355	1	35386197	35411271
ENSGALG00000030610	protein_coding	4	1964976	1965787	2.10483	0.0230508	0.0444098	up	7	2	2	1	3	4	8	0	0	0	2	1	2	0	ENSGALG00000007077	5	16650443	16680509
ENSGALG00000044024	protein_coding	2	5089703	5090353	2.98429	0.00295266	0.00700216	up	7	3	6	1	7	2	4	0	0	0	2	0	1	0	ENSGALG00000010681	8	24711436	24718455
ENSGALG00000038677	protein_coding	AADN04003454.1	11543	13798	3.34751	0.000996973	0.00259471	down	0	0	1	0	1	1	0	6	1	5	1	2	6	3	ENSGALG00000028898	21	2333655	2335752
ENSGALG00000046644	protein_coding	21	5886128	5888694	2.3097	0.00501111	0.0112892	down	1	0	2	2	1	0	0	2	6	1	3	5	4	3	ENSGALG00000009693	6	31798032	31862477
ENSGALG00000030281	protein_coding	AADN04006902.1	2081	3806	2.28948	0.0244507	0.0468533	down	0	3	0	0	1	0	2	1	5	7	4	0	5	1	ENSGALG00000030209	4	81756780	81791318
ENSGALG00000042902	protein_coding	AADN04011509.1	5105	7448	2.27867	0.0216024	0.0418503	up	8	9	1	2	7	2	1	0	1	0	3	0	0	1	ENSGALG00000023950	26	2657652	2663698
ENSGALG00000044142	protein_coding	27	43118	50162	4.01095	4.93e-05	0.000163961	down	0	1	0	1	0	0	0	2	2	3	4	12	4	3	ENSGALG00000029140	25	1448613	1451273
ENSGALG00000041274	protein_coding	27	562771	563310	2.07272	0.0116882	0.0241798	up	10	4	3	6	3	3	3	0	0	2	0	0	2	2	ENSGALG00000003193	10	3636152	3649050
ENSGALG00000045330	protein_coding	KQ759586.1	14258	16197	2.52005	0.0156128	0.0312916	down	4	0	1	0	1	0	0	3	6	11	2	1	0	4	ENSGALG00000006868	5	15714417	15737602
ENSGALG00000039268	protein_coding	15	7994663	7995025	3.27205	0.00174015	0.00432399	up	5	1	7	12	5	5	2	0	0	0	0	0	3	0	ENSGALG00000011297	1	44903758	44979576
ENSGALG00000043882	protein_coding	3	42557020	42561428	2.24465	0.017261	0.0342609	down	1	1	0	1	1	2	1	13	2	5	1	0	3	1	ENSGALG00000009341	14	13720554	13757417
ENSGALG00000036302	protein_coding	AADN04001354.1	13434	14876	2.89115	0.00211213	0.00515689	up	1	8	3	5	6	5	9	0	0	2	0	2	0	0	ENSGALG00000037443	17	5959719	5970746
ENSGALG00000029654	protein_coding	AADN04001516.1	1123	7213	3.68859	0.000158037	0.000478688	down	0	0	0	2	0	0	1	8	3	4	2	4	2	8	ENSGALG00000002287	8	2514510	2526281
ENSGALG00000036916	protein_coding	12	5570988	5571257	1.91916	0.0169942	0.0337858	up	2	10	3	1	8	4	5	2	0	0	1	1	1	2	ENSGALG00000001169	17	9474863	9499855
ENSGALG00000027010	protein_coding	27	318725	479717	1.72213	0.0161922	0.0323302	up	8	6	3	5	6	1	4	1	2	1	0	2	1	1	ENSGALG00000008274	12	18148923	18160315
ENSGALG00000030512	protein_coding	19	5796052	5798325	1.77857	0.0197026	0.0386062	down	0	1	0	2	3	0	4	4	2	2	4	5	8	2	ENSGALG00000002587	19	4944774	4972405
ENSGALG00000024294	protein_coding	14	1802278	1810474	2.00751	0.0253034	0.0482673	up	4	8	2	3	3	10	5	2	5	0	0	0	0	0	ENSGALG00000008494	7	12239757	12275487
ENSGALG00000012975	protein_coding	1	60069873	60168362	1.5448	0.0245969	0.0470993	up	4	6	3	4	8	3	5	2	3	0	1	0	2	1	ENSGALG00000002523	Z	9168675	9172752
ENSGALG00000038458	protein_coding	10	2269430	2271113	1.6022	0.0252232	0.0481305	down	2	2	2	4	0	1	0	6	2	5	2	2	6	3	ENSGALG00000008393	5	23698675	23739368
ENSGALG00000045516	protein_coding	AADN04007133.1	951	1118	2.01605	0.00549146	0.0122651	down	3	1	0	1	1	1	2	6	7	1	2	6	5	2	ENSGALG00000012877	1	57408100	57480365
ENSGALG00000035155	protein_coding	AADN04012245.1	5950	7351	2.68599	0.00278526	0.00663921	down	1	1	3	0	1	0	0	14	3	2	3	2	3	3	ENSGALG00000001252	28	2632685	2637600
ENSGALG00000034256	protein_coding	KQ759483.1	492624	493238	4.28571	0.000414275	0.00116008	down	0	1	0	0	0	0	1	9	9	0	6	11	1	0	ENSGALG00000038265	2	33303710	33547933
ENSGALG00000044353	protein_coding	KQ759533.1	25223	25988	3.10156	0.00896758	0.0190982	up	4	13	7	0	2	15	0	0	0	0	1	1	0	2	ENSGALG00000007762	14	12542573	12622755
ENSGALG00000045951	protein_coding	AADN04001696.1	12400	14371	3.05136	0.00138609	0.00350633	down	0	2	1	0	0	2	0	4	11	2	6	3	0	8	ENSGALG00000037030	1	72050789	72060671
ENSGALG00000005599	protein_coding	6	16785354	16790215	3.09037	0.00294692	0.00699124	up	6	5	0	17	6	6	3	0	0	2	0	2	0	0	ENSGALG00000002878	13	9155352	9173391
ENSGALG00000032655	protein_coding	AADN04001318.1	267	3260	1.96588	0.00513965	0.0115562	down	3	0	2	3	1	1	0	1	3	7	4	4	7	5	ENSGALG00000039605	1	190323786	190324640
ENSGALG00000040923	protein_coding	17	7127033	7190412	1.64539	0.0205838	0.0401196	down	3	2	1	3	0	1	2	1	10	5	3	1	3	7	ENSGALG00000040426	1	91590570	91595426
ENSGALG00000030518	protein_coding	AADN04014569.1	273	2429	4.04926	0.000480675	0.00133072	up	16	3	0	8	12	1	8	0	0	0	0	2	0	0	ENSGALG00000040947	1	133559659	133574827
ENSGALG00000036246	protein_coding	AADN04000908.1	22220	23283	2.5705	0.00325857	0.0076531	up	9	6	10	9	5	1	4	0	2	0	0	0	0	4	ENSGALG00000042387	12	11523697	11525444
ENSGALG00000041149	protein_coding	AADN04016040.1	414	4564	3.23521	0.000345779	0.000982245	up	5	3	10	4	13	2	10	0	1	1	0	1	1	0	ENSGALG00000008551	1	18865360	18876467
ENSGALG00000038930	protein_coding	Z	6157688	6255679	1.72837	0.0147842	0.0298311	up	8	4	2	10	10	3	4	0	1	0	3	4	1	1	ENSGALG00000007082	2	13001322	13032921
ENSGALG00000007118	protein_coding	4	9348246	9367092	2.13174	0.0134217	0.0273745	up	3	2	3	18	2	8	8	0	5	0	1	0	1	1	ENSGALG00000037148	2	115416217	115417210
ENSGALG00000030503	protein_coding	AADN04010127.1	2	6096	3.29255	0.000235264	0.000688712	up	14	10	6	7	5	1	6	0	0	0	1	1	1	1	ENSGALG00000014994	Z	23367198	23375648
ENSGALG00000032994	protein_coding	2	110864532	110865865	2.30758	0.00605933	0.0134219	down	0	0	3	3	3	0	0	2	2	9	8	1	7	6	ENSGALG00000000371	27	2399395	2423289
ENSGALG00000045987	protein_coding	AADN04003591.1	1876	3786	3.72101	0.000491392	0.00135773	up	9	7	3	20	10	0	2	1	1	0	1	0	0	0	ENSGALG00000005657	2	4233062	4328414
ENSGALG00000044579	protein_coding	AADN04005281.1	1441	2582	2.32072	0.0164228	0.0327553	down	0	0	2	3	0	4	0	4	0	6	15	6	1	4	ENSGALG00000032640	3	32366696	32528059
ENSGALG00000040681	protein_coding	1	73505426	73507456	1.98626	0.0082232	0.0176694	up	1	5	10	9	9	3	7	0	0	2	0	4	1	2	ENSGALG00000002771	8	4002528	4005892
ENSGALG00000038984	protein_coding	23	5470595	5477143	1.54161	0.0157177	0.0314848	down	1	2	4	1	4	1	1	1	4	8	4	9	4	3	ENSGALG00000026471	8	4011576	4021435
ENSGALG00000041042	protein_coding	1	131043284	131302756	1.62839	0.0247788	0.047379	up	2	3	1	5	6	15	10	1	2	0	2	2	1	3	ENSGALG00000010014	3	26828315	26833858
ENSGALG00000040505	protein_coding	1	29549181	29550317	1.86051	0.0113705	0.0235861	down	2	0	0	4	5	1	0	8	7	4	3	3	7	2	ENSGALG00000033880	2	118909175	118947095
ENSGALG00000045879	protein_coding	KQ759533.1	50253	50672	2.49604	0.00605891	0.0134219	up	6	2	4	21	2	4	10	0	0	1	1	5	0	0	ENSGALG00000032143	11	17142610	17163354
ENSGALG00000025924	protein_coding	25	2151335	2154405	2.38123	0.000813434	0.00215893	down	2	0	4	2	1	0	0	8	8	5	4	2	5	5	ENSGALG00000002656	19	5149078	5161738
ENSGALG00000031822	protein_coding	AADN04001456.1	5737	8045	2.49696	0.00749065	0.0162216	up	8	6	2	10	18	0	5	0	0	0	2	3	2	0	ENSGALG00000006390	15	8309591	8321686
ENSGALG00000038257	protein_coding	KQ759533.1	54110	61084	3.81309	0.00128313	0.00326552	up	10	0	21	4	12	2	4	0	0	0	0	0	3	0	ENSGALG00000026146	28	3894656	3898468
ENSGALG00000045507	protein_coding	2	81075588	81079317	2.07226	0.0037571	0.00871992	down	2	1	3	0	1	3	1	14	2	5	5	2	4	4	ENSGALG00000003284	18	6682424	6695680
ENSGALG00000044063	protein_coding	27	5414432	5415605	2.11866	0.000595245	0.00161884	down	2	4	0	2	1	1	1	8	6	5	4	6	3	6	ENSGALG00000009214	3	16941883	16946262
ENSGALG00000045208	protein_coding	13	2586212	2587285	1.69813	0.00527636	0.011832	down	1	2	1	3	3	2	2	8	7	7	5	6	1	2	ENSGALG00000041203	4	79798866	79843362
ENSGALG00000008275	protein_coding	10	20020799	20022277	2.69792	0.00161294	0.00403552	down	1	0	1	0	2	1	3	7	4	1	13	6	10	0	ENSGALG00000008429	3	3921514	3933565
ENSGALG00000030888	protein_coding	14	5138814	5139899	1.72034	0.0119728	0.0246942	down	2	0	0	1	5	2	4	6	4	12	4	4	4	2	ENSGALG00000027316	25	1168958	1170234
ENSGALG00000042104	protein_coding	1	96339614	96341066	3.13116	0.000102947	0.00032303	up	8	4	6	17	6	7	7	1	0	1	0	3	0	0	ENSGALG00000008813	2	20672916	20691211
ENSGALG00000041855	protein_coding	AADN04003965.1	9758	13044	2.52627	0.00216207	0.00527183	down	4	0	1	0	2	1	1	7	15	3	4	0	8	4	ENSGALG00000022137	25	2502854	2503992
ENSGALG00000031779	protein_coding	KQ759483.1	1207554	1208168	3.52809	0.00126908	0.00323288	down	0	2	0	0	0	1	2	8	19	3	6	11	0	0	ENSGALG00000017378	6	22270053	22279635
ENSGALG00000036831	protein_coding	AADN04006988.1	2242	9259	3.11729	0.00391059	0.00904328	up	8	23	2	5	0	7	11	1	0	0	0	0	4	0	ENSGALG00000006527	24	3121834	3134300
ENSGALG00000036908	protein_coding	1	48119794	48120174	1.9716	0.0256685	0.0488731	down	9	1	0	0	2	1	0	3	3	5	14	3	11	1	ENSGALG00000034163	2	44630413	44651795
ENSGALG00000044011	protein_coding	4	77588020	77589735	2.86883	0.00463413	0.0105167	up	9	2	3	2	10	4	27	0	1	5	0	0	0	0	ENSGALG00000003304	28	3825550	3857837
ENSGALG00000045928	protein_coding	15	10916964	10918840	2.25509	0.00102375	0.00265877	up	6	7	8	18	4	2	9	1	1	0	1	3	2	1	ENSGALG00000039336	AADN04002423.1	2529	6076
ENSGALG00000045316	protein_coding	AADN04002388.1	8628	11363	1.86418	0.0174181	0.0345395	down	5	0	6	0	1	1	1	3	9	9	6	8	6	0	ENSGALG00000012638	1	53642388	53676704
ENSGALG00000032704	protein_coding	KQ759334.1	42325	48926	1.94115	0.011215	0.0232972	up	18	6	15	2	5	4	2	0	1	3	0	4	2	1	ENSGALG00000008436	5	23947126	23965889
ENSGALG00000038255	protein_coding	AADN04022068.1	21	2164	1.36505	0.0154626	0.0310444	down	2	4	4	3	3	1	2	9	11	2	6	3	3	5	ENSGALG00000000104	26	1080122	1086604
ENSGALG00000026991	protein_coding	W	4074086	4083999	2.36978	0.0193236	0.0379078	up	0	0	10	11	19	0	18	1	2	1	2	2	0	1	ENSGALG00000016199	1	109772354	109775958
ENSGALG00000042535	protein_coding	AADN04011413.1	3860	7896	2.08491	0.00146773	0.00370021	down	1	1	2	3	3	2	1	15	9	7	3	4	3	2	ENSGALG00000007945	24	6212347	6216461
ENSGALG00000044025	protein_coding	1	170470174	170471307	1.54649	0.0113869	0.0236173	up	5	10	3	3	9	12	9	4	4	0	2	2	1	1	ENSGALG00000004035	19	5961995	5965823
ENSGALG00000046202	protein_coding	AADN04003267.1	7214	9649	1.40302	0.012017	0.0247744	down	0	3	3	4	2	6	1	7	5	7	9	5	3	4	ENSGALG00000011354	7	22475556	22477894
ENSGALG00000045515	protein_coding	2	373417	374786	3.33425	0.000142981	0.000437091	up	15	20	5	11	4	2	7	1	0	0	0	1	3	0	ENSGALG00000005634	15	7229327	7230473
ENSGALG00000041686	protein_coding	AADN04015528.1	1684	4867	1.44048	0.0116522	0.0241136	up	7	4	9	7	14	6	4	1	0	3	4	2	3	2	ENSGALG00000005630	15	7224895	7227195
ENSGALG00000042892	protein_coding	AADN04000640.1	30713	32149	2.2955	0.0205968	0.0401374	up	12	14	4	18	12	0	0	0	1	0	2	5	2	0	ENSGALG00000026086	15	7044230	7046377
ENSGALG00000038917	protein_coding	AADN04004915.1	10875	13135	5.04169	1.1e-05	4.08e-05	up	18	3	4	5	31	0	10	0	1	0	0	0	0	0	ENSGALG00000005515	15	7040390	7042265
ENSGALG00000019304	protein_coding	1	53368976	53369485	2.49155	0.00740902	0.0160636	up	10	16	13	19	1	2	1	0	0	0	0	3	2	4	ENSGALG00000006189	2	6282029	6286517
ENSGALG00000036299	protein_coding	AADN04001249.1	6291	8761	1.65909	0.00718861	0.0156278	up	2	13	11	12	8	6	3	2	0	2	2	3	1	4	ENSGALG00000006574	9	4340610	4344408
ENSGALG00000029872	protein_coding	AADN04010637.1	21	6940	2.84444	0.00017323	0.000520787	down	1	0	0	4	0	1	3	15	6	2	11	3	5	8	ENSGALG00000017135	1	178883375	178933935
ENSGALG00000037584	protein_coding	AADN04008421.1	60	4138	2.68447	0.00145556	0.00367104	up	24	8	15	5	9	2	1	1	0	0	0	2	3	2	ENSGALG00000002484	14	14994378	15001501
ENSGALG00000034760	protein_coding	Z	33379224	33417837	1.63057	0.00247832	0.00596983	up	3	8	6	11	6	10	14	1	2	2	2	4	2	2	ENSGALG00000011361	8	29730082	29735787
ENSGALG00000043633	protein_coding	33	1166405	1167893	1.51757	0.013944	0.0283211	up	18	5	9	4	8	5	8	1	3	0	6	3	3	0	ENSGALG00000029670	1	105440356	105461262
ENSGALG00000044714	protein_coding	2	15888370	15892729	2.70289	0.000662195	0.00178492	up	22	15	10	1	11	3	4	2	1	1	2	0	2	0	ENSGALG00000030466	33	745139	753416
ENSGALG00000038719	protein_coding	KQ759614.1	4351	7501	2.24812	0.00403151	0.0092823	down	0	3	0	1	8	0	2	7	7	21	3	4	4	6	ENSGALG00000030101	1	49627010	49631391
ENSGALG00000046005	protein_coding	12	1326694	1327066	1.53031	0.00271453	0.00648683	up	12	9	8	6	8	5	13	1	3	0	4	4	2	3	ENSGALG00000002139	26	3912974	3930246
ENSGALG00000042748	protein_coding	AADN04009688.1	538	7359	1.84529	0.00752522	0.0162888	down	2	2	1	1	6	4	2	3	2	19	15	2	3	7	ENSGALG00000004707	20	6595596	6614383
ENSGALG00000014736	protein_coding	1	77862437	77876315	1.58193	0.0194107	0.0380746	down	5	2	4	1	5	4	0	3	7	15	7	0	6	12	ENSGALG00000033854	26	1276273	1282868
ENSGALG00000042013	protein_coding	14	156912	159921	1.72507	0.00666974	0.014601	up	12	15	8	7	2	8	14	0	7	2	4	0	2	1	ENSGALG00000005725	13	13275947	13293798
ENSGALG00000040914	protein_coding	27	636719	637204	2.2099	0.00167597	0.00417449	up	16	9	17	7	16	2	3	0	1	5	2	0	2	2	ENSGALG00000006653	13	16801200	16803017
ENSGALG00000030092	protein_coding	AADN04002399.1	10285	18098	1.4257	0.0241076	0.0462485	up	6	7	4	5	22	6	13	1	1	1	2	2	2	10	ENSGALG00000016693	1	129222918	129238398
ENSGALG00000032550	protein_coding	7	15274889	15367306	1.39272	0.00822565	0.0176726	down	7	1	3	1	5	2	5	13	8	4	3	9	6	7	ENSGALG00000030907	27	4737417	4739289
ENSGALG00000014277	protein_coding	4	69427436	69428011	1.92275	0.000621861	0.00168503	up	13	12	14	16	5	6	5	1	3	1	2	4	4	0	ENSGALG00000002112	23	4028838	4033940
ENSGALG00000043815	protein_coding	1	192251603	192251839	1.55824	0.0124956	0.0256524	up	9	10	3	7	14	14	10	3	0	5	4	0	0	6	ENSGALG00000010125	4	34344526	34358907
ENSGALG00000019276	protein_coding	1	65238465	65266821	1.39902	0.015372	0.0308925	down	2	5	2	4	0	7	5	11	12	3	7	8	1	11	ENSGALG00000002543	6	4770393	4784692
ENSGALG00000033747	protein_coding	AADN04002022.1	13506	14474	1.46187	0.00899679	0.0191493	up	12	6	16	15	6	3	10	1	5	0	3	4	1	6	ENSGALG00000031270	10	2358674	2362234
ENSGALG00000016677	protein_coding	3	108016316	108018868	1.52418	0.0217919	0.0421688	up	14	16	12	9	5	6	7	0	8	1	1	9	0	1	ENSGALG00000035230	3	90162525	90533217
ENSGALG00000043595	protein_coding	15	10109368	10110376	1.96978	0.0137439	0.0279638	down	6	0	1	1	6	3	2	10	8	4	0	15	21	1	ENSGALG00000030229	23	4634006	4862095
ENSGALG00000028183	protein_coding	9	15968402	15969646	1.5407	0.00256439	0.00615793	down	0	2	1	4	6	5	6	11	7	11	5	8	8	5	ENSGALG00000031578	2	133691901	134258240
ENSGALG00000015133	protein_coding	1	83190347	83191432	2.17261	0.000137343	0.000421108	up	7	14	9	21	7	10	11	1	6	0	2	0	2	3	ENSGALG00000001364	13	8450253	8481381
ENSGALG00000038888	protein_coding	AADN04000790.1	8267	11166	1.14516	0.0201404	0.0393807	up	13	5	13	5	6	11	13	2	3	0	4	4	6	5	ENSGALG00000002719	18	4897330	4918534
ENSGALG00000009877	protein_coding	3	22357077	22527887	1.46022	0.00621359	0.0137144	up	16	9	2	10	9	6	21	1	3	4	2	4	5	2	ENSGALG00000032257	1	50962355	50982806
ENSGALG00000023439	protein_coding	7	15472739	15481395	1.35237	0.00341784	0.00799872	down	5	2	3	7	5	3	3	8	9	7	3	7	7	16	ENSGALG00000030812	10	1141801	1228631
ENSGALG00000046152	protein_coding	9	13227054	13232017	2.99192	0.0247881	0.0473918	up	0	3	0	0	54	1	30	1	0	0	4	2	0	2	ENSGALG00000027540	28	2157333	2164887
ENSGALG00000035010	protein_coding	KQ759581.1	9143	12799	1.56145	0.00216946	0.00528779	down	2	4	3	5	2	6	3	17	2	8	7	8	6	10	ENSGALG00000006197	20	10136352	10158011
ENSGALG00000046426	protein_coding	26	1473742	1479846	1.68357	0.00375403	0.00871388	up	19	18	10	12	10	4	3	2	2	1	0	4	5	5	ENSGALG00000031718	11	452086	472197
ENSGALG00000007147	protein_coding	15	9320188	9320937	1.84361	0.000267422	0.000774661	down	3	1	2	4	6	6	0	8	10	5	13	7	13	7	ENSGALG00000002678	10	2637608	2655172
ENSGALG00000014955	protein_coding	3	63986937	63988707	1.63822	0.00296398	0.0070263	down	6	2	0	6	2	3	6	14	8	10	10	7	1	11	ENSGALG00000032184	2	841145	846278
ENSGALG00000036582	protein_coding	AADN04003277.1	11000	12428	2.80582	0.000754679	0.00201484	down	1	0	2	0	6	0	4	5	0	23	6	15	12	11	ENSGALG00000027905	2	5277138	5282741
ENSGALG00000045746	protein_coding	3	105485184	105486844	2.25997	0.000413397	0.0011578	down	0	3	4	4	2	4	1	3	12	4	30	10	7	4	ENSGALG00000032004	KQ759546.1	37850	43552
ENSGALG00000029411	protein_coding	AADN04005797.1	5107	12938	2.36668	0.00154626	0.00388234	down	5	1	0	3	5	2	1	30	3	3	9	10	11	1	ENSGALG00000010971	7	19815163	19910444
ENSGALG00000040432	protein_coding	8	6835515	6861392	3.72255	1.82e-06	7.74e-06	up	10	9	4	19	28	22	7	2	0	0	2	2	0	0	ENSGALG00000000318	26	512935	772333
ENSGALG00000044195	protein_coding	20	10128461	10129789	1.30845	0.0153225	0.0308095	down	4	3	8	7	4	3	2	2	6	23	4	10	7	9	ENSGALG00000029921	1	38237620	38245641
ENSGALG00000044557	protein_coding	8	4359056	4373143	1.25305	0.0097254	0.0205278	up	16	7	12	16	11	7	8	4	2	4	2	10	0	4	ENSGALG00000004044	5	1655609	1665618
ENSGALG00000027514	protein_coding	1	154063928	154106534	3.16269	0.000153531	0.000466261	up	21	43	12	3	9	4	5	1	0	0	1	5	0	2	ENSGALG00000028520	3	15591701	15594391
ENSGALG00000014030	protein_coding	1	67216258	67232162	1.83779	0.0020383	0.00499244	down	1	1	2	8	1	3	8	20	8	14	4	7	4	9	ENSGALG00000008660	3	15825416	15830701
ENSGALG00000036872	protein_coding	AADN04004668.1	7791	9052	1.65339	0.0060411	0.0133847	down	0	0	6	10	7	0	4	11	8	8	15	10	7	8	ENSGALG00000014412	1	76773166	76778171
ENSGALG00000045639	protein_coding	2	49283032	49306268	2.83731	6.17e-05	0.000201691	up	23	27	12	19	8	2	7	0	4	2	2	0	0	3	ENSGALG00000014410	1	76767140	76771720
ENSGALG00000036021	protein_coding	4	63499443	63529231	1.71411	0.00155491	0.00390193	up	19	11	14	10	10	5	17	5	0	0	1	7	3	5	ENSGALG00000007757	20	12221204	12227956
ENSGALG00000031865	protein_coding	AADN04003690.1	3728	9860	2.05734	0.0104092	0.0217971	up	29	3	26	3	4	22	2	2	1	0	4	1	8	1	ENSGALG00000006760	4	5191319	5197869
ENSGALG00000046170	protein_coding	LGE64	662217	664720	1.32153	0.00938477	0.0198837	down	0	3	8	1	7	6	7	8	17	6	9	10	4	11	ENSGALG00000011685	5	6997540	7041138
ENSGALG00000043269	protein_coding	AADN04005791.1	2430	13063	1.28204	0.0159388	0.0318656	down	5	4	4	10	7	2	1	10	12	16	1	6	8	10	ENSGALG00000039942	4	85212799	85346817
ENSGALG00000001450	protein_coding	24	2430483	2445194	1.44022	0.00613937	0.0135781	up	21	5	10	13	12	9	13	1	0	8	6	2	5	2	ENSGALG00000009738	6	32280594	32288663
ENSGALG00000007976	protein_coding	4	13203585	13210958	1.49443	0.00277563	0.00661881	down	3	0	7	8	3	4	5	12	6	11	10	8	3	17	ENSGALG00000007642	13	18231768	18242888
ENSGALG00000046479	protein_coding	15	9954835	9966253	1.5358	0.00260017	0.00623737	down	4	2	1	13	1	3	6	9	16	9	9	13	4	9	ENSGALG00000008780	8	16611056	16617553
ENSGALG00000005937	protein_coding	15	7988410	7988999	1.34058	0.00728774	0.0158173	up	22	4	13	13	15	6	10	6	4	2	0	5	5	4	ENSGALG00000032036	1	79378276	79392110
ENSGALG00000014650	protein_coding	Z	59696523	59710078	1.03033	0.0104373	0.0218485	down	6	6	3	7	5	8	3	10	6	7	14	10	5	10	ENSGALG00000001817	11	1167098	1199514
ENSGALG00000035795	protein_coding	KQ759570.1	13173	19873	2.28298	4.77e-05	0.000159127	down	2	1	1	3	4	2	7	20	5	9	9	16	14	3	ENSGALG00000041769	AADN04008044.1	198	6351
ENSGALG00000030259	protein_coding	18	1982376	1992241	1.64056	0.000266953	0.000773525	up	19	7	15	14	10	16	8	2	5	1	2	6	4	3	ENSGALG00000031461	2	56552221	56652315
ENSGALG00000033094	protein_coding	28	1848646	1850120	1.15987	0.0104641	0.0218947	up	21	13	15	10	12	4	6	3	4	3	4	3	5	7	ENSGALG00000027768	7	22669440	22672369
ENSGALG00000046093	protein_coding	2	128549013	128567033	1.84258	5.25e-05	0.00017383	up	12	17	11	17	11	16	9	1	5	1	4	7	1	2	ENSGALG00000005710	2	4515467	4582669
ENSGALG00000040576	protein_coding	AADN04015030.1	2747	4393	1.62119	0.00122185	0.00312807	down	2	7	3	2	3	5	7	10	8	23	5	5	9	10	ENSGALG00000008199	10	19799316	19835591
ENSGALG00000046055	protein_coding	AADN04003296.1	11706	13608	5.27759	1.2e-07	6.18e-07	down	0	0	0	0	0	3	0	3	2	26	20	14	9	20	ENSGALG00000037402	3	57348864	57352201
ENSGALG00000016176	protein_coding	3	83723661	83990345	1.81206	0.000193203	0.000576061	up	10	17	13	17	16	10	11	3	0	7	3	1	6	1	ENSGALG00000011331	8	29152909	29168321
ENSGALG00000030132	protein_coding	AADN04003783.1	8061	9832	2.58844	1.4e-05	5.12e-05	up	8	22	9	4	10	25	27	1	1	4	2	2	1	3	ENSGALG00000033351	2	130013430	130018289
ENSGALG00000045184	protein_coding	AADN04001767.1	9066	11961	5.30713	5.46e-05	0.000180098	down	0	1	0	0	0	0	2	2	3	1	25	0	60	2	ENSGALG00000035912	Z	1281398	1371968
ENSGALG00000038861	protein_coding	15	7817465	7838576	1.48418	0.00267872	0.00640763	up	13	12	9	9	16	15	18	0	5	0	5	8	1	8	ENSGALG00000008666	7	13461800	13465952
ENSGALG00000015793	protein_coding	1	103054571	103056485	2.0492	2.31e-05	8.18e-05	down	4	1	5	3	5	3	3	19	5	14	6	13	14	7	ENSGALG00000002447	13	2590011	2698188
ENSGALG00000039733	protein_coding	28	1074451	1076958	1.40068	0.00347313	0.00811992	down	3	3	8	5	5	4	6	11	6	22	9	10	2	11	ENSGALG00000027853	4	87986699	88095672
ENSGALG00000042090	protein_coding	AADN04004824.1	541	2824	2.00505	0.0155779	0.0312351	down	3	12	3	1	3	0	3	10	10	42	5	0	7	3	ENSGALG00000002845	6	6694536	7131100
ENSGALG00000046525	protein_coding	Z	43286377	43286544	1.95516	5.15e-06	2.03e-05	down	5	5	2	1	4	4	5	11	16	13	8	16	5	12	ENSGALG00000013207	2	88796613	88854209
ENSGALG00000034130	protein_coding	KQ759505.1	276305	286222	1.78914	5.26e-05	0.000173951	up	25	11	14	8	16	12	13	3	3	1	6	4	2	4	ENSGALG00000037203	2	43601202	43622660
ENSGALG00000044765	protein_coding	25	2740850	2741717	2.85105	0.000169074	0.000509119	down	4	3	0	6	0	3	0	21	1	6	10	6	15	31	ENSGALG00000026306	21	3540234	3551161
ENSGALG00000001132	protein_coding	13	1651000	1654407	1.36181	0.00184584	0.00456147	down	3	0	5	10	5	9	5	8	17	11	14	11	7	8	ENSGALG00000006817	20	10629215	10669198
ENSGALG00000036782	protein_coding	23	2163120	2168258	1.35746	0.0105662	0.022081	up	10	10	13	17	21	15	9	0	3	0	9	2	6	10	ENSGALG00000007330	5	16941486	16967936
ENSGALG00000044365	protein_coding	AADN04001097.1	5909	7624	5.51792	2.34e-08	1.35e-07	up	30	0	10	19	22	23	28	0	0	1	0	1	0	0	ENSGALG00000013001	2	77650257	78277058
ENSGALG00000045966	protein_coding	2	146403186	146404935	1.3808	0.00440687	0.0100589	up	4	13	11	18	26	12	14	1	3	7	5	6	7	1	ENSGALG00000004628	19	6644761	6652458
ENSGALG00000038647	protein_coding	1	53594487	53595476	1.20356	0.00281602	0.00670822	up	14	17	9	12	16	11	16	1	5	8	9	5	2	3	ENSGALG00000042967	23	1283300	1296867
ENSGALG00000031439	protein_coding	KQ759510.1	17595	66934	2.08546	2.43e-05	8.55e-05	up	30	21	5	13	20	10	12	2	4	1	2	5	4	3	ENSGALG00000016549	1	121458301	121526563
ENSGALG00000019484	protein_coding	2	107180753	107193546	2.18107	0.000557583	0.00152659	down	7	0	1	6	1	4	6	27	2	15	14	8	5	16	ENSGALG00000005618	5	8778424	8796646
ENSGALG00000042022	protein_coding	18	157513	172630	1.61172	0.000569176	0.00155434	down	2	7	1	7	3	7	8	9	9	24	9	12	15	6	ENSGALG00000000038	11	2027092	2028876
ENSGALG00000036751	protein_coding	AADN04016811.1	2291	3008	1.39838	0.000843144	0.00223138	up	18	11	11	11	11	23	19	2	6	3	2	9	2	8	ENSGALG00000039406	21	4924441	4926347
ENSGALG00000016196	protein_coding	1	109708831	109726598	1.51065	0.00636597	0.0140222	up	14	42	5	19	6	11	9	1	3	5	9	6	2	4	ENSGALG00000035368	11	1036239	1037901
ENSGALG00000043671	protein_coding	AADN04003124.1	6503	12619	1.35829	0.0243429	0.0466612	down	7	1	3	4	18	4	3	30	6	3	12	12	11	6	ENSGALG00000006876	20	10729767	10733859
ENSGALG00000044792	protein_coding	2	128458829	128493053	1.10397	0.00685706	0.0149774	up	18	23	8	8	8	15	19	2	7	6	5	5	4	8	ENSGALG00000030016	3	107829340	107838487
ENSGALG00000021353	protein_coding	Z	9061671	9064766	1.41185	0.014526	0.0293742	up	29	14	16	29	4	11	4	2	3	7	0	5	5	10	ENSGALG00000017239	1	188310798	188327047
ENSGALG00000010002	protein_coding	5	35776779	35777955	1.79252	0.000168215	0.000506781	down	1	4	4	5	5	10	4	3	16	9	10	23	9	24	ENSGALG00000006613	5	14123783	14134951
ENSGALG00000032890	protein_coding	AADN04000989.1	24329	26297	3.57474	5.41e-05	0.000178656	up	17	16	43	41	17	1	1	2	0	0	0	2	4	1	ENSGALG00000000786	26	2355279	2358720
ENSGALG00000034995	protein_coding	10	12950765	12953019	1.02904	0.0250806	0.0479016	down	5	6	3	17	5	9	4	10	12	21	9	8	14	4	ENSGALG00000010018	1	35522127	35529831
ENSGALG00000030015	protein_coding	AADN04000790.1	19686	22624	2.80407	0.00270685	0.00647063	up	23	18	32	52	5	0	4	2	0	0	0	4	8	1	ENSGALG00000033557	10	19950725	19956592
ENSGALG00000044444	protein_coding	AADN04000785.1	24966	28822	1.5334	0.00113037	0.00291281	down	6	3	4	7	6	5	8	21	6	22	14	3	12	9	ENSGALG00000028147	25	2586099	2589028
ENSGALG00000000604	protein_coding	23	542219	560715	1.17876	0.00412799	0.00948142	up	14	19	16	19	11	13	15	6	1	1	5	8	4	13	ENSGALG00000009373	4	21053776	21061372
ENSGALG00000044853	protein_coding	1	3256248	3256647	1.81576	5.14e-05	0.000170373	down	3	5	7	7	3	6	3	14	7	25	16	5	11	16	ENSGALG00000000775	25	2580940	2585553
ENSGALG00000046056	protein_coding	AADN04003759.1	15199	16104	2.57303	3.86e-07	1.84e-06	up	15	19	20	13	20	29	16	1	0	0	8	5	2	2	ENSGALG00000012610	Z	41408607	41414029
ENSGALG00000046511	protein_coding	18	4572063	4573556	1.69756	0.00454754	0.010338	down	5	3	11	11	4	3	0	18	12	32	4	11	12	4	ENSGALG00000007462	20	11097473	11102231
ENSGALG00000042695	protein_coding	25	2751761	2752646	1.74112	0.000577456	0.00157486	down	0	8	7	5	4	5	7	20	12	25	10	11	13	3	ENSGALG00000007700	5	17890386	17910730
ENSGALG00000004495	protein_coding	18	9203491	9209288	1.07466	0.00470847	0.0106697	down	6	2	12	8	11	8	4	14	16	8	13	9	9	17	ENSGALG00000009134	1	24474948	24550085
ENSGALG00000029209	protein_coding	AADN04000790.1	33391	34819	1.13775	0.0216425	0.0419192	up	17	6	32	9	13	15	17	3	7	5	0	10	11	4	ENSGALG00000026182	26	3457558	3475255
ENSGALG00000039177	protein_coding	4	69474111	69475473	2.11507	4.91e-07	2.3e-06	up	16	32	17	18	14	16	17	3	0	5	5	5	2	4	ENSGALG00000000337	28	399017	399271
ENSGALG00000032715	protein_coding	AADN04006653.1	6221	7110	2.233	0.0152638	0.0307118	down	15	0	11	1	0	1	0	34	3	11	15	19	1	21	ENSGALG00000038266	10	10075674	10075919
ENSGALG00000040995	protein_coding	7	35383942	35421288	1.39611	0.00514864	0.0115722	down	5	2	6	10	3	4	15	14	5	3	11	21	21	19	ENSGALG00000029034	Z	56523265	56524001
ENSGALG00000028153	protein_coding	8	22043498	22045110	1.17533	0.00990165	0.020857	down	1	6	4	9	14	9	7	12	26	6	6	17	15	9	ENSGALG00000008704	2	19883398	20025167
ENSGALG00000045264	protein_coding	10	2247064	2254521	2.03879	1.07e-06	4.75e-06	down	5	3	3	8	3	4	6	18	19	14	11	8	24	9	ENSGALG00000005549	19	8767108	8771927
ENSGALG00000028496	protein_coding	24	4306089	4309236	1.83154	0.00019527	0.000581756	up	20	10	26	37	16	11	8	6	2	9	2	2	4	3	ENSGALG00000005687	6	16983558	16994562
ENSGALG00000001859	protein_coding	21	2525058	2526092	1.29983	0.00888806	0.0189397	up	26	10	16	15	12	23	15	1	10	1	4	15	7	1	ENSGALG00000036941	2	54413610	54449714
ENSGALG00000041230	protein_coding	AADN04004407.1	3762	6602	1.91885	0.00302396	0.00716025	down	5	2	3	4	5	5	11	6	3	8	27	10	47	2	ENSGALG00000007095	2	13043021	13088931
ENSGALG00000020976	protein_coding	8	6290642	6302150	1.53253	0.000474066	0.00131373	down	11	5	11	6	2	4	4	27	13	13	16	13	6	10	ENSGALG00000005108	9	8405073	8455900
ENSGALG00000043158	protein_coding	AADN04001173.1	7664	10513	1.47804	0.00985216	0.0207622	up	30	14	16	1	19	28	15	0	3	8	5	11	6	3	ENSGALG00000016830	1	137511432	137545754
ENSGALG00000046487	protein_coding	KQ759534.1	71787	73378	1.09873	0.0213207	0.0413825	down	5	16	13	2	6	5	6	18	5	14	20	15	4	15	ENSGALG00000008559	4	16458726	16479086
ENSGALG00000046483	protein_coding	AADN04011746.1	4256	4702	1.29383	0.000436929	0.00121744	down	7	11	4	9	11	4	3	16	22	11	12	14	9	12	ENSGALG00000017165	1	180387461	180409863
ENSGALG00000044314	protein_coding	AADN04004233.1	1449	5610	1.86793	0.00025162	0.000732651	up	23	24	9	26	9	12	32	2	11	0	2	8	2	5	ENSGALG00000037283	6	22085379	22089061
ENSGALG00000029558	protein_coding	27	4013152	4014983	1.21937	0.00137809	0.00348754	down	4	7	9	14	5	9	3	11	9	20	14	14	17	9	ENSGALG00000021636	19	3852618	4079778
ENSGALG00000043878	protein_coding	14	13457871	13458710	1.806	2.21e-05	7.82e-05	down	5	4	4	9	7	5	4	27	5	10	12	24	14	13	ENSGALG00000004598	15	6128724	6150323
ENSGALG00000030380	protein_coding	AADN04000612.1	98789	99811	3.05682	3.05e-06	1.25e-05	up	52	26	25	24	11	3	13	0	3	1	2	6	3	0	ENSGALG00000038254	6	31433391	31439504
ENSGALG00000043508	protein_coding	AADN04017457.1	21	4419	1.59983	1.26e-05	4.65e-05	up	26	20	23	19	16	10	15	4	2	5	7	6	4	6	ENSGALG00000017207	1	185537307	185552138
ENSGALG00000029612	protein_coding	17	2414650	2418657	1.09082	0.0115676	0.0239627	down	10	8	6	8	9	5	9	21	7	2	22	19	14	8	ENSGALG00000009001	7	14833295	14861223
ENSGALG00000004441	protein_coding	18	9090618	9103064	1.62025	8.91e-05	0.000282725	down	3	6	5	5	9	8	6	15	19	23	5	11	20	9	ENSGALG00000001624	27	4451019	4455696
ENSGALG00000030653	protein_coding	15	7983153	7983467	3.34241	4.25e-05	0.000143311	up	11	11	73	20	32	2	8	0	0	1	2	6	0	4	ENSGALG00000014747	Z	20211903	20325189
ENSGALG00000031283	protein_coding	AADN04002793.1	6778	8911	1.08403	0.0146617	0.0296163	down	0	5	9	12	7	8	15	15	15	23	10	8	11	11	ENSGALG00000003249	6	9308663	9321759
ENSGALG00000034566	protein_coding	AADN04001110.1	723	11866	1.56232	8.29e-05	0.00026467	down	5	4	8	5	11	5	6	13	13	19	12	5	17	24	ENSGALG00000017171	1	180655551	180717734
ENSGALG00000043415	protein_coding	2	42357024	42375913	1.70339	0.000166551	0.000502095	up	13	13	19	38	21	16	15	0	3	7	11	3	3	6	ENSGALG00000041921	4	66651377	66675027
ENSGALG00000035741	protein_coding	AADN04023593.1	21	1065	1.06988	0.00418145	0.00959412	up	19	22	10	15	25	15	13	9	1	6	5	7	9	8	ENSGALG00000026663	11	831860	836141
ENSGALG00000032750	protein_coding	26	1156252	1162125	1.6017	0.000222037	0.000654234	up	27	18	12	23	21	9	24	1	4	6	1	6	12	5	ENSGALG00000038000	2	44545657	44555354
ENSGALG00000043544	protein_coding	28	3328399	3329080	1.67973	6.17e-06	2.4e-05	down	10	5	6	5	10	5	1	21	15	16	16	15	10	14	ENSGALG00000041346	6	19020439	19033686
ENSGALG00000046619	protein_coding	AADN04001020.1	5413	7314	2.69182	1.72e-08	1.02e-07	down	1	0	3	2	5	7	6	29	16	23	16	14	10	14	ENSGALG00000045607	4	35246046	35247365
ENSGALG00000044139	protein_coding	1	113065907	113089597	2.75011	6.2e-07	2.86e-06	up	42	42	12	10	9	17	26	1	2	0	3	5	4	4	ENSGALG00000010338	4	35247822	35249204
ENSGALG00000038550	protein_coding	AADN04002066.1	5014	13697	1.49918	0.026145	0.0496883	down	7	1	12	9	5	1	13	27	1	13	1	18	26	19	ENSGALG00000006346	13	15407661	15414929
ENSGALG00000044310	protein_coding	AADN04001205.1	18551	20453	1.67605	0.00120257	0.00308083	down	3	8	2	16	9	3	3	14	28	22	4	7	21	14	ENSGALG00000036627	7	22714676	22716777
ENSGALG00000005014	protein_coding	4	2066138	2068061	1.50955	0.000429928	0.00119902	down	7	2	6	15	9	2	7	23	11	20	16	7	14	15	ENSGALG00000012357	7	30913614	30916302
ENSGALG00000046237	protein_coding	2	560868	562991	1.02266	0.0088431	0.0188526	down	10	6	10	6	6	14	8	18	13	12	9	9	27	8	ENSGALG00000007675	24	5567223	5572244
ENSGALG00000008635	protein_coding	1	20345887	20349591	1.21427	0.00658713	0.0144509	up	10	34	12	10	22	26	13	4	12	6	3	2	9	8	ENSGALG00000016286	1	115794507	115795376
ENSGALG00000027189	protein_coding	21	6545466	6548687	1.81301	1.86e-05	6.67e-05	down	3	1	6	10	10	6	5	16	16	30	9	17	9	17	ENSGALG00000016215	1	110801925	110817459
ENSGALG00000042603	protein_coding	18	5911382	5922327	1.56381	2.58e-05	9.05e-05	up	23	21	11	23	14	18	30	3	3	3	7	12	5	5	ENSGALG00000008652	4	16618013	16621740
ENSGALG00000039066	protein_coding	5	15451610	15451999	2.06011	1.1e-06	4.87e-06	up	27	24	18	22	20	13	27	0	11	5	6	3	3	1	ENSGALG00000008990	4	17371567	17392924
ENSGALG00000009397	protein_coding	9	20014861	20019274	1.57952	0.000684286	0.0018375	up	32	19	23	10	32	14	9	2	3	5	9	13	2	4	ENSGALG00000034826	4	2407922	2408746
ENSGALG00000032138	protein_coding	AADN04019329.1	22	3496	1.67969	5.01e-06	1.98e-05	up	26	18	17	18	17	19	29	1	4	2	9	4	7	9	ENSGALG00000000884	13	1027565	1056195
ENSGALG00000033483	protein_coding	AADN04004747.1	8031	10992	2.59378	0.000155598	0.000472073	up	36	7	39	51	14	5	11	3	2	10	0	3	0	3	ENSGALG00000024031	27	2818781	2822414
ENSGALG00000033870	protein_coding	1	11695658	11696044	1.04805	0.00237082	0.00572953	up	10	15	23	20	19	22	18	7	13	8	5	3	6	7	ENSGALG00000032051	5	68100	70585
ENSGALG00000023787	protein_coding	19	5372422	5378879	1.4131	0.00257796	0.0061881	up	20	32	25	19	14	13	14	4	1	9	12	9	6	0	ENSGALG00000013708	2	92244236	92255610
ENSGALG00000045097	protein_coding	AADN04002995.1	12888	17383	1.14253	0.00101211	0.00263077	up	13	24	18	20	11	18	29	5	6	4	12	5	9	7	ENSGALG00000000660	11	19192249	19204431
ENSGALG00000030747	protein_coding	22	3855566	3860579	1.13955	0.0227276	0.0438694	down	1	12	6	8	19	5	9	28	10	10	22	5	18	10	ENSGALG00000001479	19	3177600	3181452
ENSGALG00000044503	protein_coding	15	8005477	8006453	1.2389	0.0181273	0.0357886	down	4	9	17	14	7	1	6	11	20	30	7	9	25	5	ENSGALG00000032372	5	7394751	7414352
ENSGALG00000026817	protein_coding	14	8660155	8671303	2.04312	6.76e-06	2.62e-05	down	6	11	6	4	5	2	4	14	18	41	14	11	16	9	ENSGALG00000014122	1	68359231	68373633
ENSGALG00000007803	protein_coding	6	22819215	22823045	1.50247	4.14e-05	0.000139785	down	4	9	9	10	3	8	8	28	10	11	17	14	16	18	ENSGALG00000029367	11	18663342	18665323
ENSGALG00000044791	protein_coding	AADN04000785.1	41392	44622	1.15165	0.0238589	0.0458148	down	3	14	7	18	9	9	1	7	22	34	8	8	14	14	ENSGALG00000016261	1	113150989	113183645
ENSGALG00000043497	protein_coding	AADN04000732.1	600	5024	1.44441	0.020437	0.0398806	down	2	6	7	14	19	3	2	11	31	33	1	15	17	6	ENSGALG00000001607	18	3536063	3544410
ENSGALG00000030671	protein_coding	AADN04007842.1	372	4983	1.723	1.08e-06	4.82e-06	down	7	5	4	7	10	3	10	14	12	21	18	11	22	22	ENSGALG00000030703	7	18094028	18102411
ENSGALG00000031545	protein_coding	AADN04012438.1	454	7233	1.63726	1.14e-05	4.24e-05	up	24	28	18	23	13	14	31	3	10	6	2	10	3	5	ENSGALG00000011020	2	31819123	31821634
ENSGALG00000030553	protein_coding	AADN04018111.1	717	4129	1.68899	2.46e-05	8.66e-05	up	36	16	23	17	24	19	18	2	5	4	15	3	4	5	ENSGALG00000016736	1	130435494	130485774
ENSGALG00000038845	protein_coding	17	551488	554106	1.66175	0.0021389	0.00521977	down	4	7	8	6	5	8	10	15	26	40	13	12	13	0	ENSGALG00000003818	13	11367959	11407960
ENSGALG00000041089	protein_coding	Z	9474822	9588748	1.31523	4.85e-05	0.000161376	up	25	17	19	15	18	24	26	8	5	7	6	3	7	10	ENSGALG00000001892	18	4382661	4389729
ENSGALG00000019221	protein_coding	1	88638528	88655946	1.2961	0.00798616	0.0172181	down	14	6	8	13	8	9	1	11	25	30	9	28	9	4	ENSGALG00000003753	11	6275128	6297360
ENSGALG00000041290	protein_coding	AADN04017652.1	21	4304	1.91853	0.000476403	0.00131948	down	11	1	13	9	3	0	6	26	22	27	7	19	6	21	ENSGALG00000034982	10	2491141	2495357
ENSGALG00000043381	protein_coding	2	44146929	44151846	1.72759	3.2e-06	1.31e-05	down	6	9	3	10	5	5	10	28	26	14	16	20	8	14	ENSGALG00000008121	6	23388033	23390555
ENSGALG00000044132	protein_coding	26	5003097	5019149	1.89107	1.72e-08	1.03e-07	up	32	20	24	22	20	17	28	5	5	7	2	6	5	5	ENSGALG00000013294	10	9208018	9221830
ENSGALG00000045531	protein_coding	2	8116549	8117197	1.73105	0.000197521	0.0005878	down	2	9	5	10	5	13	4	22	26	30	9	11	21	6	ENSGALG00000001325	10	2375742	2379385
ENSGALG00000023866	protein_coding	9	15613111	15615832	1.32187	0.000123219	0.00038115	down	12	6	11	4	16	5	6	11	18	18	24	15	19	15	ENSGALG00000001320	10	2370952	2373767
ENSGALG00000042980	protein_coding	AADN04018429.1	2049	3929	2.01024	3.38e-09	2.25e-08	down	5	5	10	6	4	4	8	19	18	20	16	14	28	19	ENSGALG00000025822	3	32004825	32007728
ENSGALG00000045270	protein_coding	9	898804	899177	1.08529	0.00231565	0.00560573	down	6	13	12	8	8	3	18	21	18	16	19	9	13	18	ENSGALG00000040754	5	918081	919817
ENSGALG00000021598	protein_coding	21	5257571	5261605	1.6117	4.86e-05	0.000161646	down	8	5	1	8	12	6	13	24	19	22	18	16	6	23	ENSGALG00000008730	7	13721207	13734266
ENSGALG00000040078	protein_coding	AADN04001618.1	142	24500	1.1642	0.0169415	0.0337026	up	6	30	26	18	28	21	19	2	11	4	8	24	3	3	ENSGALG00000039742	16	52234	56078
ENSGALG00000021092	protein_coding	9	9524183	9530093	1.33271	0.000233735	0.000684777	up	21	26	30	33	19	13	12	4	3	5	9	8	8	12	ENSGALG00000042279	20	12557653	12565016
ENSGALG00000041547	protein_coding	12	7012349	7015424	1.62452	0.00015716	0.000476267	up	24	23	22	24	39	14	17	3	3	0	9	15	8	5	ENSGALG00000033695	6	20555766	20558838
ENSGALG00000042157	protein_coding	Z	37483156	37496430	2.23781	1.79e-09	1.25e-08	up	21	19	21	27	23	40	27	6	2	5	6	5	5	1	ENSGALG00000016102	4	90736410	90740599
ENSGALG00000044375	protein_coding	10	20087394	20088248	1.456	0.000194181	0.000578697	down	3	7	4	8	10	12	14	24	15	26	20	21	6	14	ENSGALG00000043213	6	20561818	20567803
ENSGALG00000038834	protein_coding	1	12120386	12302861	1.10851	0.00228261	0.005531	up	20	14	17	17	18	35	28	7	8	6	7	19	3	6	ENSGALG00000002470	7	22543083	22545995
ENSGALG00000045067	protein_coding	2	6080671	6118332	1.00294	0.00423803	0.0097167	down	4	15	14	9	14	8	8	20	18	15	27	11	10	14	ENSGALG00000008283	9	15737984	15742734
ENSGALG00000029056	protein_coding	Z	20906732	20934345	1.27371	0.00538838	0.0120525	up	34	24	19	38	14	7	20	2	2	12	4	12	13	6	ENSGALG00000008178	9	15729730	15735004
ENSGALG00000043769	protein_coding	AADN04007027.1	3714	11084	1.51151	0.00220992	0.00537507	down	13	1	8	12	8	10	5	11	23	35	9	8	7	36	ENSGALG00000045351	9	15721373	15726510
ENSGALG00000001533	protein_coding	11	907720	922542	1.02098	0.00322542	0.00758292	down	8	14	15	14	7	5	9	25	14	21	20	12	11	12	ENSGALG00000008105	9	15707712	15717444
ENSGALG00000033826	protein_coding	AADN04005116.1	21	11274	2.55354	2.98e-05	0.000103107	up	27	14	5	12	68	15	47	3	1	3	4	1	10	3	ENSGALG00000045255	9	15688012	15698720
ENSGALG00000046120	protein_coding	24	5527128	5528555	1.90566	0.00225372	0.00546734	down	9	0	4	24	4	6	1	24	4	33	30	13	13	21	ENSGALG00000016690	3	109249183	109255105
ENSGALG00000044876	protein_coding	AADN04002305.1	6292	8727	1.4662	0.00545001	0.0121801	up	11	44	12	36	21	3	40	1	10	8	10	3	7	9	ENSGALG00000046639	3	109257270	109266201
ENSGALG00000027703	protein_coding	19	5749443	5751959	1.55445	8.62e-07	3.89e-06	down	6	11	8	10	11	5	6	24	15	15	17	15	20	27	ENSGALG00000044199	14	2243623	2249683
ENSGALG00000040044	protein_coding	AADN04002423.1	14653	16886	1.0722	0.00540092	0.0120777	down	8	4	18	22	5	9	8	10	19	17	21	11	17	29	ENSGALG00000023925	6	16567737	16581736
ENSGALG00000038287	protein_coding	KQ759460.1	18121	22171	1.15113	0.00152907	0.00384387	down	6	17	7	15	9	5	13	11	16	10	13	19	27	32	ENSGALG00000005795	6	17575972	17595441
ENSGALG00000040096	protein_coding	AADN04010902.1	3991	6200	1.10794	0.00324936	0.00763339	down	18	9	10	8	12	9	8	7	8	30	28	21	20	13	ENSGALG00000011894	1	49442475	49451655
ENSGALG00000030026	protein_coding	1	59653910	59659868	1.09784	0.000515363	0.00141953	up	28	27	19	34	16	13	24	5	10	6	15	8	7	9	ENSGALG00000011394	8	26763424	26794681
ENSGALG00000043984	protein_coding	5	24201183	24212060	1.07984	0.0137439	0.0279638	up	28	25	22	12	30	32	9	4	4	5	13	20	12	3	ENSGALG00000006050	5	10523091	10531593
ENSGALG00000043174	protein_coding	2	98109943	98165703	2.72379	2.6e-12	2.85e-11	up	32	32	27	43	21	18	34	0	5	2	5	2	5	6	ENSGALG00000027908	4	38240517	38250340
ENSGALG00000032030	protein_coding	Z	11920915	11948644	1.5746	0.000440509	0.00122686	up	17	10	40	26	42	21	20	5	0	13	7	9	7	6	ENSGALG00000045037	14	2263231	2268407
ENSGALG00000007133	protein_coding	14	8879870	8880169	1.66012	1.23e-05	4.56e-05	up	38	21	14	17	24	24	43	8	9	3	3	12	3	8	ENSGALG00000016710	3	110271102	110291935
ENSGALG00000028989	protein_coding	1	50654764	50654976	3.11826	2.74e-14	4.09e-13	up	31	21	31	36	40	21	36	1	2	1	4	7	1	4	ENSGALG00000004436	14	3893187	3904532
ENSGALG00000016570	protein_coding	3	105538305	105551077	1.18144	0.00914181	0.019429	down	7	1	12	12	6	26	9	7	14	19	15	31	28	20	ENSGALG00000004449	14	3928052	3937393
ENSGALG00000001136	protein_coding	21	1399143	1400827	1.01113	0.0153578	0.0308698	down	21	11	9	4	15	14	5	18	38	20	10	9	19	13	ENSGALG00000011162	5	48244148	48259476
ENSGALG00000030853	protein_coding	1	45981253	46014031	1.76468	0.000986208	0.00257067	down	9	3	8	12	22	0	1	24	12	19	28	16	17	32	ENSGALG00000020688	8	21941123	21949791
ENSGALG00000035265	protein_coding	AADN04019134.1	21	3567	1.49948	0.0223429	0.0431673	up	8	50	3	2	34	53	26	3	17	2	6	7	12	4	ENSGALG00000010469	8	21954420	21961495
ENSGALG00000045641	protein_coding	4	894546	896560	1.36847	0.000835831	0.00221361	down	3	13	7	17	11	4	13	22	9	27	22	23	7	29	ENSGALG00000039257	KQ759549.1	31896	39419
ENSGALG00000002439	protein_coding	Z	73045588	73100799	1.45247	2.94e-06	1.21e-05	up	32	26	18	25	18	35	27	3	4	8	9	11	9	9	ENSGALG00000013535	4	61746761	61759707
ENSGALG00000014980	protein_coding	1	80119877	80140301	1.84192	2.09e-07	1.05e-06	down	6	8	7	11	8	4	10	31	39	20	13	18	18	14	ENSGALG00000009365	2	22521894	22535678
ENSGALG00000030736	protein_coding	AADN04001085.1	5820	12591	1.57799	1.12e-06	4.96e-06	down	13	9	7	9	10	8	7	37	21	21	19	14	16	20	ENSGALG00000041222	2	112384150	112391681
ENSGALG00000044892	protein_coding	7	5868380	5869357	1.92406	0.000106333	0.000332754	up	38	23	33	10	15	35	46	3	4	1	1	15	11	8	ENSGALG00000029435	2	114794326	114922700
ENSGALG00000037378	protein_coding	7	35817116	35817469	2.35107	3.59e-06	1.45e-05	down	2	4	5	13	11	0	7	24	23	52	13	20	23	11	ENSGALG00000033511	2	2104464	2106136
ENSGALG00000031660	protein_coding	AADN04000623.1	125781	130347	2.0076	2.61e-06	1.09e-05	down	2	5	5	14	15	5	5	30	23	31	11	12	30	23	ENSGALG00000008661	8	16258746	16261197
ENSGALG00000040869	protein_coding	15	9321167	9322772	1.86966	1.03e-08	6.35e-08	down	5	6	8	8	9	14	5	25	20	13	22	31	16	35	ENSGALG00000004128	4	1361144	1372692
ENSGALG00000045871	protein_coding	AADN04001226.1	12424	14329	2.02129	3.98e-05	0.000134866	down	7	3	18	9	1	9	4	28	40	18	22	5	28	23	ENSGALG00000032079	MT	14893	16035
ENSGALG00000038078	protein_coding	10	4273090	4285753	1.71604	8.02e-07	3.65e-06	up	24	29	16	23	30	41	40	7	4	6	13	4	10	5	ENSGALG00000007093	18	9870934	9887583
ENSGALG00000034504	protein_coding	1	50835752	50841816	1.26982	0.00827095	0.0177617	down	8	4	27	22	7	3	7	15	17	39	15	10	19	33	ENSGALG00000012454	1	51420095	51439366
ENSGALG00000046559	protein_coding	9	14937512	14942524	2.37792	1.96e-09	1.35e-08	up	28	31	37	60	29	19	22	1	3	2	8	8	4	9	ENSGALG00000012545	7	36407493	36416220
ENSGALG00000042143	protein_coding	AADN04012830.1	21	2348	1.30847	0.000198219	0.000589686	down	9	4	16	11	13	9	15	20	23	37	13	32	12	15	ENSGALG00000015015	4	79471991	79474709
ENSGALG00000043966	protein_coding	1	136390841	136391329	1.49798	0.00298008	0.00706358	up	58	27	27	17	46	19	5	4	2	10	7	9	5	20	ENSGALG00000015774	1	102882363	102939069
ENSGALG00000046282	protein_coding	5	49560738	49561602	1.31639	0.000179703	0.000538324	down	9	5	18	9	15	12	10	25	7	24	32	27	16	24
ENSGALG00000003602	protein_coding	11	4979231	5000529	1.13404	0.00191975	0.00472394	up	49	21	27	20	17	14	43	7	11	17	5	9	7	13
ENSGALG00000005811	protein_coding	12	9077383	9082535	1.11819	0.00266386	0.00637586	up	31	21	17	39	39	27	16	6	3	14	18	6	14	8
ENSGALG00000039287	protein_coding	AADN04012349.1	2381	7292	1.2258	0.00130054	0.00330845	up	28	34	23	37	21	26	27	2	11	12	9	25	7	2
ENSGALG00000046455	protein_coding	26	2218163	2220788	1.8036	0.000226374	0.000665846	down	11	16	7	10	15	3	0	12	13	11	40	35	37	27
ENSGALG00000040159	protein_coding	10	599661	601066	1.68794	0.000604351	0.00164143	up	48	53	41	35	12	14	10	5	2	12	2	13	8	11
ENSGALG00000043916	protein_coding	1	74531769	74536229	1.23042	0.000208095	0.000616392	down	17	11	10	11	13	14	8	17	18	10	44	17	22	30
ENSGALG00000032499	protein_coding	1	194257667	194259937	1.67804	3.32e-05	0.000114249	down	8	13	4	21	3	9	10	32	19	40	25	12	15	26
ENSGALG00000038149	protein_coding	AADN04002195.1	6160	6459	1.15282	0.00102389	0.00265877	down	13	20	12	13	18	2	12	31	32	17	23	15	25	15
ENSGALG00000037444	protein_coding	AADN04005104.1	9079	10192	1.16376	0.000465482	0.00129253	down	17	12	5	18	17	9	12	36	36	16	17	16	17	21
ENSGALG00000044668	protein_coding	3	79901745	79909741	2.7028	3.04e-05	0.000104878	up	43	18	76	91	19	4	5	2	3	7	1	4	7	7
ENSGALG00000037561	protein_coding	4	86477984	86483344	3.24983	6.1e-12	6.3e-11	up	39	45	29	69	49	13	27	1	3	1	1	8	3	6
ENSGALG00000034916	protein_coding	AADN04001796.1	1420	3612	1.35763	3.49e-06	1.41e-05	down	18	7	8	13	12	19	6	29	24	20	28	19	23	26
ENSGALG00000032352	protein_coding	20	12771997	12772221	1.32365	5.04e-07	2.36e-06	up	38	28	32	36	32	22	25	6	7	8	12	11	12	12
ENSGALG00000028327	protein_coding	5	22884776	22895233	1.08186	0.000262947	0.000762873	down	7	8	13	26	14	15	13	25	17	19	23	37	22	19
ENSGALG00000046618	protein_coding	10	4256506	4263913	1.76295	5.3e-06	2.09e-05	up	40	22	12	39	32	40	47	8	0	7	8	9	11	11
ENSGALG00000023526	protein_coding	20	11051160	11053295	3.5295	1.81e-10	1.47e-09	up	52	70	34	65	25	5	26	3	0	3	4	4	2	3
ENSGALG00000026215	protein_coding	5	27969434	27971341	1.09437	7.54e-05	0.000242589	up	30	28	20	41	30	17	40	6	12	12	11	14	8	14
ENSGALG00000009464	protein_coding	9	20609867	20618283	1.09437	0.00361796	0.00842445	up	19	35	23	46	18	44	20	4	15	9	8	25	12	5
ENSGALG00000046289	protein_coding	7	25512345	25517690	2.0973	8.24e-09	5.16e-08	up	51	43	20	38	27	32	34	4	4	0	8	12	11	7
ENSGALG00000003751	protein_coding	6	9798541	9814620	2.62012	9.29e-10	6.68e-09	down	5	4	6	6	12	5	4	33	18	19	59	47	20	11
ENSGALG00000019934	protein_coding	3	65978631	65979937	1.13841	0.00177751	0.00441029	down	11	16	12	17	7	15	16	22	19	42	9	11	30	29
ENSGALG00000031548	protein_coding	23	1252978	1254503	1.22401	0.00188144	0.00463949	down	7	11	16	20	13	8	16	36	13	49	19	22	14	12
ENSGALG00000046062	protein_coding	20	11048079	11049623	2.23318	8.12e-06	3.11e-05	up	53	39	46	67	21	14	12	4	0	12	9	6	7	4
ENSGALG00000003203	protein_coding	12	2634371	2635472	1.76991	2.75e-07	1.35e-06	down	12	7	4	15	17	9	6	31	24	45	17	29	21	21
ENSGALG00000029816	protein_coding	10	4235823	4242641	1.07602	0.00591842	0.0131365	up	25	19	34	29	21	47	37	26	17	5	12	6	8	5
ENSGALG00000045362	protein_coding	5	1570918	1572157	2.02364	6.15e-10	4.55e-09	down	6	12	8	12	7	9	8	38	44	36	20	20	22	19
ENSGALG00000041421	protein_coding	KQ759476.1	11056	15903	2.24734	2.5e-05	8.77e-05	up	53	46	24	82	22	12	25	3	9	16	1	1	8	5
ENSGALG00000033647	protein_coding	5	36040301	36043588	1.49017	3.69e-06	1.49e-05	up	57	35	33	23	30	30	28	3	8	9	15	18	6	9
ENSGALG00000033509	protein_coding	AADN04018779.1	21	1880	1.01571	8.59e-05	0.000273651	down	16	19	12	23	13	10	13	25	27	33	24	24	17	20
ENSGALG00000046026	protein_coding	AADN04003650.1	9148	9315	1.06094	0.000297988	0.000856478	down	18	16	11	16	15	14	14	37	34	10	21	21	29	20
ENSGALG00000023113	protein_coding	5	38127140	38127742	2.77348	1.78e-11	1.7e-10	down	3	4	4	9	2	14	5	38	39	23	15	34	20	56
ENSGALG00000036558	protein_coding	AADN04006411.1	2208	10360	2.10406	0.00328681	0.0077106	down	0	0	10	12	8	0	32	20	54	40	27	24	12	33
ENSGALG00000040099	protein_coding	21	6804430	6806034	2.42365	1.27e-14	2.01e-13	up	48	39	28	42	34	29	56	6	2	5	8	10	4	6
ENSGALG00000033546	protein_coding	AADN04006989.1	4962	7434	1.75597	0.0216537	0.0419365	up	41	30	34	58	54	0	37	9	9	16	4	0	19	0
ENSGALG00000043947	protein_coding	1	144542869	144544356	1.40457	0.00158198	0.00396364	up	55	47	34	60	22	8	13	4	14	7	6	10	18	13
ENSGALG00000013058	protein_coding	1	62161773	62170124	1.84948	3.95e-09	2.59e-08	down	8	11	17	9	9	9	8	44	35	18	27	41	17	23
ENSGALG00000030905	protein_coding	Z	43435397	43441708	2.37211	2.44e-13	3.14e-12	up	42	53	42	38	33	34	36	4	10	11	0	7	4	7
ENSGALG00000045347	protein_coding	2	375288	376557	3.09225	8.47e-08	4.49e-07	up	59	89	58	42	20	12	17	1	1	7	0	5	5	9
ENSGALG00000040236	protein_coding	AADN04010102.1	1171	3411	1.03548	0.000157773	0.000477969	down	14	12	20	20	8	15	21	39	24	21	24	20	23	27
ENSGALG00000003176	protein_coding	6	9199146	9202263	1.52056	1.65e-05	5.98e-05	up	36	48	29	23	19	46	50	6	19	3	7	11	8	17
ENSGALG00000044576	protein_coding	13	8589162	8592265	1.3151	0.00417524	0.00958105	up	41	45	58	20	19	34	23	5	5	15	8	3	30	10
ENSGALG00000005754	protein_coding	11	17830467	17838111	1.04007	0.00958772	0.0202742	down	20	14	30	22	13	7	5	26	25	48	16	21	31	12
ENSGALG00000045390	protein_coding	3	9736543	9737565	1.40608	3.55e-06	1.44e-05	down	11	17	12	21	7	16	10	23	51	20	33	33	23	17
ENSGALG00000034895	protein_coding	AADN04017297.1	81	4523	1.21476	1.42e-05	5.18e-05	up	21	26	30	35	44	42	42	9	12	14	11	21	9	7
ENSGALG00000012080	protein_coding	2	46391293	46392168	2.62734	6.77e-11	5.91e-10	up	65	61	50	34	45	13	30	3	7	2	7	10	6	4
ENSGALG00000040040	protein_coding	Z	479768	479971	1.16453	0.000104806	0.00032842	up	48	51	28	36	29	29	20	5	19	7	14	18	11	13
ENSGALG00000041343	protein_coding	Z	41475923	41504741	1.97978	4.51e-11	4.03e-10	up	54	52	37	34	25	39	38	2	12	8	11	11	5	8
ENSGALG00000045436	protein_coding	17	5468233	5470006	1.40188	2.86e-06	1.18e-05	down	20	13	18	19	6	13	7	22	29	39	26	22	22	42
ENSGALG00000011233	protein_coding	7	22173058	22174678	1.71892	0.000209159	0.000618948	down	15	9	13	3	8	5	29	21	34	14	77	31	14	26
ENSGALG00000005052	protein_coding	4	2125520	2126533	1.80255	2.24e-06	9.4e-06	up	48	44	65	61	25	18	17	4	8	11	6	15	11	9
ENSGALG00000043342	protein_coding	1	105961857	105963482	2.64968	4.16e-12	4.42e-11	up	42	47	39	32	50	32	68	3	3	4	1	17	7	5
ENSGALG00000046286	protein_coding	AADN04004448.1	6270	7934	1.36697	0.00851888	0.0182519	down	18	2	25	21	16	10	9	47	2	14	24	41	46	31
ENSGALG00000027287	protein_coding	13	10326156	10332399	1.11873	0.00047286	0.00131085	down	10	11	14	24	14	18	24	24	33	51	32	25	15	17
ENSGALG00000044927	protein_coding	6	19958572	19959798	1.7091	7.04e-05	0.000227285	up	66	19	33	74	44	16	33	16	9	15	4	3	13	7
ENSGALG00000005938	protein_coding	14	6596806	6600097	1.69736	1.35e-06	5.88e-06	down	10	9	17	13	19	9	10	12	28	54	35	53	15	31
ENSGALG00000045705	protein_coding	24	35477	36312	1.19482	0.000459052	0.00127651	down	17	4	22	13	13	24	19	32	41	26	15	17	32	41
ENSGALG00000023237	protein_coding	10	20102278	20102977	1.29826	0.000134358	0.000412641	down	10	11	21	16	12	18	19	35	26	57	26	18	13	32
ENSGALG00000016969	protein_coding	1	167167416	167185684	1.7728	0.000100513	0.000315929	up	72	45	41	48	46	13	24	0	9	19	10	9	15	5
ENSGALG00000016258	protein_coding	1	113045418	113063987	1.31965	0.000285875	0.000824737	up	50	43	24	29	29	37	63	2	29	8	12	9	12	17
ENSGALG00000033689	protein_coding	AADN04009331.1	21	2429	1.75317	0.000361219	0.00102187	up	50	67	42	68	37	21	14	2	3	28	6	14	11	6
ENSGALG00000032048	protein_coding	AADN04002988.1	12994	15326	1.06562	0.00108797	0.0028102	down	13	5	17	25	17	32	16	31	22	42	40	26	20	26
ENSGALG00000013625	protein_coding	3	50228502	50262908	1.51002	1.66e-06	7.13e-06	up	44	61	61	46	23	28	26	12	15	10	6	10	15	13
ENSGALG00000031937	protein_coding	KQ759582.1	6814	10646	1.80618	3.91e-07	1.87e-06	up	62	27	51	38	32	58	37	1	4	16	15	13	11	10
ENSGALG00000010223	protein_coding	1	37790882	37796392	3.8152	3.79e-17	8.89e-16	up	70	81	49	72	47	25	25	2	4	4	0	6	3	2
ENSGALG00000039184	protein_coding	AADN04002765.1	21	2044	1.1449	0.000285139	0.00082287	up	19	35	46	35	44	51	42	8	13	4	22	25	15	13
ENSGALG00000041853	protein_coding	17	539383	548500	1.4723	0.00187192	0.00461946	down	8	13	26	26	11	11	10	47	54	28	56	18	23	3
ENSGALG00000041603	protein_coding	AADN04016065.1	21	2167	1.45603	5.28e-05	0.000174781	down	27	22	18	6	12	14	7	42	30	51	32	16	28	30
ENSGALG00000034326	protein_coding	2	43188628	43189527	1.7094	0.00017221	0.000518226	down	8	14	25	21	9	6	12	39	27	90	16	22	12	36
ENSGALG00000046617	protein_coding	1	91266901	91280783	1.97201	3.94e-10	3.02e-09	up	66	39	33	34	51	42	61	9	3	15	4	11	9	15
ENSGALG00000043903	protein_coding	AADN04000704.1	31649	32962	1.29928	1.54e-05	5.6e-05	down	11	14	21	20	24	9	19	38	39	53	19	26	25	29
ENSGALG00000037761	protein_coding	4	64765847	64876536	1.54707	1.31e-09	9.26e-09	up	43	41	41	34	48	37	62	7	9	11	20	17	8	12
ENSGALG00000045640	protein_coding	AADN04024605.1	911	5580	2.33439	1.76e-08	1.05e-07	up	73	60	16	31	78	24	62	9	9	13	8	8	2	5
ENSGALG00000033682	protein_coding	AADN04010902.1	4031	7740	1.10817	4.87e-05	0.00016188	down	20	17	15	19	20	13	27	51	37	17	24	41	29	25
ENSGALG00000045596	protein_coding	1	88691478	88699579	2.80807	1.78e-08	1.06e-07	up	84	51	65	96	32	4	33	8	5	3	8	7	7	3
ENSGALG00000015687	protein_coding	4	83332108	83333493	1.08162	4.45e-05	0.000149452	up	41	48	31	41	44	35	42	15	11	7	9	30	21	14
ENSGALG00000043541	protein_coding	Z	20852018	20869245	1.96272	4.09e-13	5.09e-12	up	68	52	43	37	41	48	41	6	5	9	13	13	7	15
ENSGALG00000017411	protein_coding	Z	10315101	10316441	2.54596	1.88e-14	2.89e-13	up	42	28	55	75	74	42	41	5	5	4	12	8	4	11
ENSGALG00000040796	protein_coding	Z	41513429	41566679	1.65428	4.29e-08	2.38e-07	up	62	51	31	29	32	64	47	11	11	5	17	18	7	12
ENSGALG00000034117	protein_coding	AADN04006967.1	21	1938	1.61257	3.65e-05	0.00012461	down	11	20	10	15	11	6	31	6	43	50	29	38	44	44
ENSGALG00000036102	protein_coding	AADN04006340.1	4735	7005	1.30848	0.000638101	0.00172626	down	9	10	28	26	23	11	14	20	32	72	17	32	42	21
ENSGALG00000041081	protein_coding	Z	2109403	2131201	1.62218	1.36e-06	5.89e-06	up	74	60	33	33	33	54	31	14	4	5	16	19	11	14
ENSGALG00000041833	protein_coding	19	65084	67172	1.49473	0.00108619	0.00280599	down	16	4	19	12	12	24	24	40	38	77	7	17	39	25
ENSGALG00000045805	protein_coding	27	2774901	2778975	1.05411	6.55e-05	0.000212765	up	46	29	28	45	59	45	37	16	22	9	10	23	10	22
ENSGALG00000038191	protein_coding	3	105207853	105215120	1.62182	2.71e-10	2.13e-09	up	62	49	37	49	40	35	53	4	12	10	11	20	9	19
ENSGALG00000035153	protein_coding	AADN04000990.1	1142	4270	1.05352	0.000763727	0.00203752	down	18	17	26	20	32	8	18	28	24	30	62	33	17	37
ENSGALG00000031454	protein_coding	26	743050	760766	1.89886	9.89e-09	6.11e-08	up	62	55	52	41	38	20	72	6	8	7	15	18	14	5
ENSGALG00000042801	protein_coding	22	4606606	4609137	1.86099	3.91e-05	0.000132705	down	6	12	19	19	25	3	9	20	15	90	39	41	35	26
ENSGALG00000039641	protein_coding	AADN04010928.1	1196	4222	1.18326	9.33e-05	0.000295137	up	64	45	19	36	43	45	52	12	12	7	12	15	22	27
ENSGALG00000010722	protein_coding	2	26674819	26685279	1.24314	0.000834228	0.00220968	down	25	8	24	16	23	17	17	56	8	29	55	42	24	29
ENSGALG00000040546	protein_coding	20	12721987	12741432	1.98678	5.05e-09	3.27e-08	up	77	57	51	31	51	40	49	3	9	2	12	20	16	11
ENSGALG00000022531	protein_coding	5	24001629	24002515	2.19757	5.86e-09	3.75e-08	up	52	32	45	65	60	35	81	2	9	12	5	24	10	3
ENSGALG00000032682	protein_coding	AADN04014562.1	3083	5972	1.13118	0.000341447	0.000971134	down	16	18	21	21	26	29	8	53	24	46	39	24	22	32
ENSGALG00000028411	protein_coding	Z	9011806	9015926	2.62321	5.42e-13	6.61e-12	up	109	83	43	43	38	37	32	8	8	6	5	8	5	10
ENSGALG00000004348	protein_coding	14	3345291	3350085	1.08219	4.78e-05	0.000159348	up	47	44	33	37	48	49	50	3	15	13	18	31	17	21
ENSGALG00000032233	protein_coding	1	188606333	188609865	1.29029	1.88e-05	6.74e-05	up	62	48	46	39	45	34	54	7	10	16	16	38	7	15
ENSGALG00000015138	protein_coding	Z	35539519	35587556	1.51535	5.37e-07	2.5e-06	up	85	42	26	42	34	46	68	15	7	11	18	17	16	11
ENSGALG00000046600	protein_coding	4	77989248	77990045	1.07822	6.51e-05	0.000211458	down	24	14	21	29	17	24	21	39	41	54	29	31	15	42
ENSGALG00000034342	protein_coding	AADN04009921.1	2332	8705	1.40859	1.86e-07	9.39e-07	down	17	17	17	16	22	20	21	51	49	51	24	32	43	22
ENSGALG00000004360	protein_coding	13	13024860	13028805	2.0452	5.13e-08	2.82e-07	down	3	11	14	17	14	18	16	61	29	82	25	32	26	45
ENSGALG00000044107	protein_coding	AADN04006547.1	4052	5421	1.24991	0.000134988	0.000414368	down	13	11	25	20	23	35	15	65	39	25	36	26	49	26
ENSGALG00000038402	protein_coding	1	61212908	61216681	1.19882	5.22e-05	0.00017281	up	69	53	51	36	43	31	63	4	16	13	17	33	23	16
ENSGALG00000043190	protein_coding	1	79034542	79047592	1.2602	1.1e-05	4.08e-05	down	13	27	17	21	27	24	16	44	36	66	19	38	33	39
ENSGALG00000032054	protein_coding	AADN04003737.1	3269	14040	1.75759	8.32e-07	3.77e-06	down	17	17	12	10	24	10	23	80	71	32	24	32	37	24
ENSGALG00000043332	protein_coding	6	10970974	11009124	1.74306	3.08e-13	3.91e-12	up	47	54	45	56	56	64	60	10	12	8	22	7	17	15
ENSGALG00000043856	protein_coding	7	5844610	5845590	1.40747	2.52e-05	8.84e-05	up	65	38	40	27	78	65	48	10	22	3	15	17	25	18
ENSGALG00000026578	protein_coding	2	2309932	2314698	1.06004	5.9e-06	2.31e-05	up	44	39	41	43	56	43	74	11	21	28	20	19	14	17
ENSGALG00000008056	protein_coding	20	14090807	14106276	2.01857	1.5e-08	9.05e-08	up	59	109	38	44	38	49	66	5	7	5	20	23	8	13
ENSGALG00000041546	protein_coding	1	188689752	188765981	1.67071	8.96e-12	9.02e-11	up	52	57	68	49	63	44	54	8	10	10	23	24	11	12
ENSGALG00000031996	protein_coding	AADN04000923.1	18055	24200	1.14237	3.33e-05	0.000114273	down	21	11	22	19	30	33	24	56	44	40	50	24	32	33
ENSGALG00000042339	protein_coding	1	174109556	174205670	1.27438	1.31e-05	4.83e-05	up	47	43	31	38	77	64	71	14	28	10	23	27	10	12
ENSGALG00000035694	protein_coding	AADN04002311.1	10156	18341	1.11433	4.94e-05	0.000164112	down	20	18	29	40	20	21	18	41	34	46	46	20	57	38
ENSGALG00000045126	protein_coding	AADN04004282.1	5375	5542	1.02919	0.0020625	0.00504769	down	40	34	22	21	20	10	26	77	40	18	30	34	40	38
ENSGALG00000033455	protein_coding	20	8060137	8062454	1.22496	1.32e-07	6.78e-07	up	67	53	39	41	49	58	67	23	9	22	18	20	16	19
ENSGALG00000032982	protein_coding	4	49543274	49544304	1.72807	3.76e-13	4.72e-12	up	67	71	47	45	67	46	73	8	16	11	21	21	10	14
ENSGALG00000031225	protein_coding	1	178671358	178682347	1.51003	2.57e-11	2.38e-10	up	62	51	60	58	58	53	61	11	27	11	7	23	12	23
ENSGALG00000032656	protein_coding	AADN04000662.1	81193	95948	1.28333	0.000688973	0.0018495	down	15	23	13	22	29	28	29	74	51	7	50	33	27	66
ENSGALG00000044191	protein_coding	26	2104254	2109031	1.48335	6.53e-05	0.000212204	down	18	14	18	50	11	25	10	28	47	81	27	40	29	71
ENSGALG00000037526	protein_coding	28	3396001	3398518	1.42247	1.09e-06	4.86e-06	down	14	26	17	22	34	16	20	44	36	84	33	35	34	49
ENSGALG00000034702	protein_coding	Z	41967260	41974126	1.82654	3.84e-10	2.95e-09	up	86	85	35	36	44	79	67	9	17	11	13	20	17	11
ENSGALG00000034782	protein_coding	KQ759674.1	1141	5963	1.06372	0.00218882	0.00532866	down	24	6	28	28	31	32	31	57	29	74	32	45	18	41
ENSGALG00000033643	protein_coding	AADN04001659.1	7382	24051	1.84623	2.56e-11	2.37e-10	up	64	42	73	80	58	50	78	2	21	8	19	19	12	19
ENSGALG00000026092	protein_coding	2	103694029	103711854	1.31399	2.16e-05	7.66e-05	up	76	46	57	124	36	38	36	10	17	23	23	26	17	16
ENSGALG00000040116	protein_coding	AADN04014650.1	2906	5193	1.80535	6.56e-13	7.9e-12	up	68	103	53	68	52	44	60	7	17	15	12	19	13	20
ENSGALG00000034033	protein_coding	AADN04003723.1	9503	15427	1.63901	4.57e-13	5.66e-12	up	84	51	39	63	69	77	57	12	16	18	18	21	13	15
ENSGALG00000031755	protein_coding	AADN04011969.1	1476	7025	1.354	2.05e-07	1.03e-06	down	12	21	19	43	28	18	24	59	48	61	40	36	44	43
ENSGALG00000030214	protein_coding	AADN04001960.1	10406	16523	1.85305	1.71e-11	1.64e-10	down	15	14	16	14	17	22	29	76	39	62	63	50	38	33
ENSGALG00000032103	protein_coding	2	145268134	145276406	3.00277	1.47e-22	8.18e-21	up	67	109	61	68	64	68	88	0	8	10	7	16	4	8
ENSGALG00000044168	protein_coding	22	2473739	2478645	2.6623	0.013776	0.0280199	down	16	3	1	29	22	6	5	6	82	203	4	0	4	102
ENSGALG00000042263	protein_coding	1	48184357	48184737	1.44135	5.77e-05	0.000189777	down	37	24	23	16	21	10	29	15	96	42	75	47	50	25
ENSGALG00000015843	protein_coding	3	77863991	77867357	1.26051	6.74e-08	3.63e-07	up	89	59	75	56	41	51	49	13	18	13	22	29	23	23
ENSGALG00000014664	protein_coding	Z	57880857	57984258	1.26127	1.04e-05	3.89e-05	up	84	92	50	39	32	60	63	9	31	15	24	26	15	22
ENSGALG00000045350	protein_coding	4	16715725	16741025	1.57258	3.63e-11	3.29e-10	up	61	79	58	75	58	45	71	12	21	23	11	27	18	8
ENSGALG00000035647	protein_coding	AADN04003823.1	6863	9029	1.24905	0.000727071	0.00194506	down	37	12	38	20	30	19	22	78	24	36	79	55	45	16
ENSGALG00000017096	protein_coding	1	176202964	176222534	1.21311	1.63e-07	8.3e-07	up	67	49	42	62	77	52	74	13	13	28	20	31	14	27
ENSGALG00000042048	protein_coding	3	17929002	17937715	1.71376	3.03e-12	3.28e-11	up	56	61	62	74	69	61	81	7	13	19	13	36	14	12
ENSGALG00000043841	protein_coding	3	104937620	104938738	1.08697	6.47e-05	0.000210317	down	18	17	49	34	34	24	16	46	36	49	40	44	64	45
ENSGALG00000016127	protein_coding	1	108027675	108053510	2.06434	1.28e-06	5.61e-06	down	22	8	10	5	23	28	20	44	63	57	78	115	22	16
ENSGALG00000008164	protein_coding	10	19701317	19719362	2.35786	1.08e-15	2.01e-14	up	106	85	60	48	64	58	94	11	9	6	20	13	16	5
ENSGALG00000023909	protein_coding	17	2380344	2390598	1.07028	0.000259527	0.000753658	up	121	52	36	58	73	34	46	21	17	30	22	31	16	22
ENSGALG00000002854	protein_coding	Z	9459677	9469737	1.2278	2.26e-09	1.55e-08	up	68	59	44	64	67	62	69	20	11	22	32	20	20	22
ENSGALG00000033792	protein_coding	AADN04001840.1	5941	18591	1.01085	5.38e-07	2.51e-06	down	19	29	34	34	24	34	31	42	41	51	49	39	61	45
ENSGALG00000026297	protein_coding	1	182491148	182499165	1.8351	7.2e-05	0.000232337	up	86	42	76	88	110	85	3	22	12	10	18	17	9	22
ENSGALG00000021357	protein_coding	20	5257029	5258186	2.52034	2.27e-10	1.81e-09	down	3	7	18	11	15	22	17	64	46	121	67	28	35	58
ENSGALG00000030881	protein_coding	21	3147679	3148119	1.3336	2.13e-05	7.57e-05	up	87	88	38	42	37	60	102	11	27	12	29	36	14	17
ENSGALG00000014999	protein_coding	Z	25332235	25392547	2.36203	1.31e-15	2.41e-14	up	76	54	42	79	93	106	82	12	20	11	12	12	2	14
[truncated: 1,216 more rows]

## Sheet: Table S3 
The specific primers for qRT-PCR in this study
Gene	Sequence
ATP2A3	F: AGTACGGCCCCAATGAACT
	R: CAGGCCAGGATAAAGGAG
JCHAIN	F: TCGTCCCCTCCAAAGACAAT
	R: CCAGCTCAATTTCTACGGGA
LMNB2	F: GATGAAACAGCCAAAGAGAG
	R: CTTCGCTTCTATGGAAGAGT
OLFM4	F: ATGAAGCACACACAGGTGGC
	R: TTGGCAAAGAACTTTGGGGA
GOLM1	F: ATGCCAACAGAGCACATTGG
	R: GCCTTCCATACTCTGTCCGT
PRCP	F: CCTCACGCAGCAGATTGATC
	R: CACATCCCACATAAAACCCG
PDGFRA	F: AAGTCGAGGGGAAGGACATC
	R: ACTTGGGTCACTTGTCCGAC
SYNGR3	F: CTCCATTGTGAATGAGTGCT
	R: CCTTCACACTACTGATCTGC
PSAP	F: CTCAAGACAAACCCAAGCAG
	R: AGGCGGTCACATTCCTCCTT
NMU	F: AGAAGCCACAGGGTTCAGAT
	R: TCTTCCCATTACGTGGCCTG
HSPB1	F: CCCTGGACGTCAACCACTTT
	R: TTTGCCGGTGATCTCCACGA
PCP4	F: ATGAGCGAGAGACAAGGAAC
	R: GAACTGGGACTGTATCGCCA
GAL	F: TTGGGCCACATGCAGTAG
	R: CCGCCTCTTTAAGATGCA
18S	F: CCGGACACGGACAGGATTGACA
	R: CAGACAAATCGCTCCACCAACTAAG

## Sheet: Table S4 
The enriched pathways
#Term	Database	ID	Input number	Background number	rich factor	P-Value	Corrected P-Value	Hyperlink	Gene ID
Cytokine-cytokine receptor interaction	KEGG PATHWAY	gga04060	36	135	0.266667	0.000235136	0.0573129	http://www.genome.jp/kegg-bin/show_pathway?gga04060/gga:416586%09red/gga:396488%09red/gga:420696%09red/gga:396308%09red/gga:419424%09red/gga:417247%09red/gga:395872%09red/gga:374229%09red/gga:408184%09red/gga:769278%09red/gga:395199%09red/gga:395262%09red/gga:395494%09red/gga:418943%09red/gga:422316%09red/gga:396495%09red/gga:426054%09red/gga:395451%09red/gga:378930%09red/gga:417838%09red/gga:421…	ENSGALG00000005638|ENSGALG00000006346|ENSGALG00000013929|ENSGALG00000007174|ENSGALG00000016852|ENSGALG00000011808|ENSGALG00000007668|ENSGALG00000014716|ENSGALG00000013869|ENSGALG00000017119|ENSGALG00000028256|ENSGALG00000013372|ENSGALG00000011733|ENSGALG00000026098|ENSGALG00000011735|ENSGALG00000011734|ENSGALG00000026663|ENSGALG00000013865|ENSGALG00000007874|ENSGALG00000019322|ENSGALG00000007121|…
Sphingolipid metabolism	KEGG PATHWAY	gga00600	14	37	0.378378	0.00145533	0.135631	http://www.genome.jp/kegg-bin/show_pathway?gga00600/gga:423679%09red/gga:423394%09red/gga:426648%09red/gga:771503%09red/gga:423454%09red/gga:427335%09red/gga:420118%09red/gga:374033%09red/gga:768538%09red/gga:419087%09red/gga:429131%09red/gga:422529%09red/gga:426145%09red/gga:428949%09red	ENSGALG00000003160|ENSGALG00000003751|ENSGALG00000005599|ENSGALG00000010902|ENSGALG00000013493|ENSGALG00000006361|ENSGALG00000009037|ENSGALG00000011213|ENSGALG00000015682|ENSGALG00000014624|ENSGALG00000010593|ENSGALG00000010535|ENSGALG00000012018|ENSGALG00000000755
Focal adhesion	KEGG PATHWAY	gga04510	38	165	0.230303	0.00171447	0.155217	http://www.genome.jp/kegg-bin/show_pathway?gga04510/gga:386572%09red/gga:396242%09red/gga:417553%09red/gga:418236%09red/gga:418235%09red/gga:374016%09red/gga:416939%09red/gga:395280%09red/gga:396282%09red/gga:422350%09red/gga:424860%09red/gga:427171%09red/gga:373953%09red/gga:422342%09red/gga:419031%09red/gga:100857227%09red/gga:428883%09red/gga:396239%09red/gga:396215%09red/gga:424191%09red/gga:…	ENSGALG00000005438|ENSGALG00000011141|ENSGALG00000008747|ENSGALG00000008058|ENSGALG00000014891|ENSGALG00000014201|ENSGALG00000014203|ENSGALG00000008016|ENSGALG00000014615|ENSGALG00000006426|ENSGALG00000002583|ENSGALG00000008266|ENSGALG00000012755|ENSGALG00000007917|ENSGALG00000028567|ENSGALG00000008081|ENSGALG00000014903|ENSGALG00000014786|ENSGALG00000012885|ENSGALG00000011200|ENSGALG00000017283|…
Neuroactive ligand-receptor interaction	KEGG PATHWAY	gga04080	47	235	0.2	0.0059469	0.282417	http://www.genome.jp/kegg-bin/show_pathway?gga04080/gga:429116%09red/gga:422568%09red/gga:422405%09red/gga:418333%09red/gga:768996%09red/gga:770943%09red/gga:420979%09red/gga:428955%09red/gga:425670%09red/gga:420401%09red/gga:430628%09red/gga:414890%09red/gga:408184%09red/gga:395305%09red/gga:427635%09red/gga:430019%09red/gga:428906%09red/gga:428209%09red/gga:418665%09red/gga:421858%09red/gga:427…	ENSGALG00000009640|ENSGALG00000020143|ENSGALG00000016912|ENSGALG00000004613|ENSGALG00000005476|ENSGALG00000013371|ENSGALG00000014268|ENSGALG00000005923|ENSGALG00000020331|ENSGALG00000023142|ENSGALG00000014202|ENSGALG00000016744|ENSGALG00000006575|ENSGALG00000022702|ENSGALG00000016687|ENSGALG00000004649|ENSGALG00000005524|ENSGALG00000004120|ENSGALG00000011080|ENSGALG00000001690|ENSGALG00000004066|…
Regulation of actin cytoskeleton	KEGG PATHWAY	gga04810	34	156	0.217949	0.00604544	0.282417	http://www.genome.jp/kegg-bin/show_pathway?gga04810/gga:416939%09red/gga:417553%09red/gga:424000%09red/gga:771142%09red/gga:418491%09red/gga:395951%09red/gga:424108%09red/gga:424860%09red/gga:415989%09red/gga:373953%09red/gga:428906%09red/gga:100857227%09red/gga:396239%09red/gga:378917%09red/gga:396215%09red/gga:424191%09red/gga:395511%09red/gga:419752%09red/gga:418044%09red/gga:422247%09red/gga:…	ENSGALG00000025748|ENSGALG00000009640|ENSGALG00000011141|ENSGALG00000008747|ENSGALG00000008058|ENSGALG00000016937|ENSGALG00000014891|ENSGALG00000006663|ENSGALG00000006426|ENSGALG00000004368|ENSGALG00000002583|ENSGALG00000028567|ENSGALG00000008081|ENSGALG00000015842|ENSGALG00000014903|ENSGALG00000014786|ENSGALG00000017153|ENSGALG00000013929|ENSGALG00000011080|ENSGALG00000012865|ENSGALG00000014012|…
Calcium signaling pathway	KEGG PATHWAY	gga04020	31	142	0.21831	0.00831412	0.332076	http://www.genome.jp/kegg-bin/show_pathway?gga04020/gga:429116%09red/gga:422546%09red/gga:768996%09red/gga:418212%09red/gga:395694%09red/gga:396434%09red/gga:395759%09red/gga:427635%09red/gga:430019%09red/gga:422827%09red/gga:428209%09red/gga:424214%09red/gga:429211%09red/gga:408082%09red/gga:427212%09red/gga:424542%09red/gga:396111%09red/gga:395760%09red/gga:427721%09red/gga:428906%09red/gga:428…	ENSGALG00000009640|ENSGALG00000016912|ENSGALG00000004613|ENSGALG00000013929|ENSGALG00000008177|ENSGALG00000026687|ENSGALG00000023142|ENSGALG00000008544|ENSGALG00000009400|ENSGALG00000006835|ENSGALG00000010812|ENSGALG00000011080|ENSGALG00000004066|ENSGALG00000001459|ENSGALG00000008875|ENSGALG00000008603|ENSGALG00000001573|ENSGALG00000014071|ENSGALG00000014983|ENSGALG00000006642|ENSGALG00000010614|…
Intestinal immune network for IgA production	KEGG PATHWAY	gga04672	9	26	0.346154	0.0154385	0.471208	http://www.genome.jp/kegg-bin/show_pathway?gga04672/gga:768950%09red/gga:418257%09red/gga:417983%09red/gga:396249%09red/gga:424105%09red/gga:100858236%09red/gga:427944%09red/gga:428454%09red/gga:374229%09red	ENSGALG00000028341|ENSGALG00000014280|ENSGALG00000019322|ENSGALG00000014362|ENSGALG00000016852|ENSGALG00000015474|ENSGALG00000008656|ENSGALG00000011808|ENSGALG00000008669
Cell adhesion molecules (CAMs)	KEGG PATHWAY	gga04514	19	84	0.22619	0.0255705	0.562483	http://www.genome.jp/kegg-bin/show_pathway?gga04514/gga:768950%09red/gga:395362%09red/gga:419736%09red/gga:395398%09red/gga:396249%09red/gga:395822%09red/gga:419222%09red/gga:386580%09red/gga:424106%09red/gga:396420%09red/gga:396225%09red/gga:421960%09red/gga:100858236%09red/gga:396175%09red/gga:427944%09red/gga:374028%09red/gga:424364%09red/gga:424105%09red/gga:424910%09red	ENSGALG00000028341|ENSGALG00000014477|ENSGALG00000009107|ENSGALG00000008666|ENSGALG00000016480|ENSGALG00000002192|ENSGALG00000008747|ENSGALG00000014362|ENSGALG00000001774|ENSGALG00000001472|ENSGALG00000015474|ENSGALG00000008656|ENSGALG00000026862|ENSGALG00000001621|ENSGALG00000015902|ENSGALG00000002643|ENSGALG00000002655|ENSGALG00000008669|ENSGALG00000005102
Dorso-ventral axis formation	KEGG PATHWAY	gga04320	7	21	0.333333	0.0360055	0.60784	http://www.genome.jp/kegg-bin/show_pathway?gga04320/gga:386572%09red/gga:373953%09red/gga:416804%09red/gga:423816%09red/gga:415326%09red/gga:396235%09red/gga:396239%09red	ENSGALG00000008016|ENSGALG00000001501|ENSGALG00000002150|ENSGALG00000001143|ENSGALG00000002645|ENSGALG00000006912|ENSGALG00000012865
Nicotinate and nicotinamide metabolism	KEGG PATHWAY	gga00760	8	26	0.307692	0.0361916	0.60784	http://www.genome.jp/kegg-bin/show_pathway?gga00760/gga:417707%09red/gga:422828%09red/gga:422827%09red/gga:427196%09red/gga:768471%09red/gga:424072%09red/gga:416505%09red/gga:421833%09red	ENSGALG00000008098|ENSGALG00000015268|ENSGALG00000014509|ENSGALG00000015833|ENSGALG00000014508|ENSGALG00000014869|ENSGALG00000004842|ENSGALG00000020876
ECM-receptor interaction	KEGG PATHWAY	gga04512	14	61	0.229508	0.0461789	0.643557	http://www.genome.jp/kegg-bin/show_pathway?gga04512/gga:396242%09red/gga:431597%09red/gga:100857227%09red/gga:424191%09red/gga:396213%09red/gga:374016%09red/gga:422350%09red/gga:396420%09red/gga:396225%09red/gga:421960%09red/gga:419031%09red/gga:396076%09red/gga:395951%09red/gga:414837%09red	ENSGALG00000014903|ENSGALG00000007917|ENSGALG00000008266|ENSGALG00000016480|ENSGALG00000011141|ENSGALG00000008747|ENSGALG00000005628|ENSGALG00000014967|ENSGALG00000014891|ENSGALG00000017272|ENSGALG00000004526|ENSGALG00000011200|ENSGALG00000002655|ENSGALG00000014615
Insulin signaling pathway	KEGG PATHWAY	gga04910	22	110	0.2	0.0482716	0.643557	http://www.genome.jp/kegg-bin/show_pathway?gga04910/gga:386572%09red/gga:416939%09red/gga:417553%09red/gga:771142%09red/gga:374038%09red/gga:100858827%09red/gga:427171%09red/gga:373953%09red/gga:419220%09red/gga:396239%09red/gga:424542%09red/gga:395688%09red/gga:422347%09red/gga:417706%09red/gga:395217%09red/gga:427185%09red/gga:430557%09red/gga:768421%09red/gga:424208%09red/gga:418406%09red/gga:…	ENSGALG00000001501|ENSGALG00000015351|ENSGALG00000008010|ENSGALG00000027287|ENSGALG00000008016|ENSGALG00000002583|ENSGALG00000011360|ENSGALG00000008081|ENSGALG00000014786|ENSGALG00000012612|ENSGALG00000012865|ENSGALG00000008060|ENSGALG00000007023|ENSGALG00000008107|ENSGALG00000006390|ENSGALG00000005043|ENSGALG00000003428|ENSGALG00000029077|ENSGALG00000014832|ENSGALG00000021220|ENSGALG00000028530|…

## Sheet: Table S5
The DEGs related to focal adhesionin in this study
Gene ID	Gene name	log2FoldChange	pvalue	padj	trend
ENSGALG00000005438	PARVA	2.06532	7.49e-24	5.15e-22	up
ENSGALG00000011141	ITGB6	1.31895	0.000395028	0.00111039	up
ENSGALG00000008747	ITGA8	1.46275	9.67e-24	6.53e-22	up
ENSGALG00000008058	PAK3	1.23237	3.21e-14	4.75e-13	up
ENSGALG00000014891	ITGA1	1.75502	4.54e-17	1.05e-15	up
ENSGALG00000014201	PARVB	1.38975	5.4e-19	1.69e-17	up
ENSGALG00000014203	PARVG	2.20456	1.08e-14	1.73e-13	up
ENSGALG00000008016	GRB2	1.67207	9.43e-15	1.53e-13	up
ENSGALG00000014615	LAMA1	1.31662	1.2e-23	7.86e-22	up
ENSGALG00000006426	PAK2	1.61242	1.85e-22	1e-20	up
ENSGALG00000002583	PIK3CD	1.34814	1.84e-07	9.31e-07	up
ENSGALG00000008266	COL4A6	1.60378	1.93e-08	1.14e-07	up
ENSGALG00000012755	IGF-I	3.1923	4.12e-06	1.65e-05	up
ENSGALG00000007917	LAMB4	1.09216	3.08e-05	0.000106479	down
ENSGALG00000028567	MYL9	1.50297	2.02e-10	1.62e-09	down
ENSGALG00000008081	PIK3CG	2.28138	1.05e-24	8.01e-23	up
ENSGALG00000014903	ITGA2	1.15577	2.74e-15	4.78e-14	up
ENSGALG00000014786	PIK3R1	2.01654	1.09e-17	2.79e-16	up
ENSGALG00000012885	BCL2	1.14592	3.29e-38	1.29e-35	up
ENSGALG00000011200	THBS2	1.80575	6.52e-14	9.23e-13	up
ENSGALG00000017283	CCND2	1.50865	2.51e-29	3.41e-27	up
ENSGALG00000013929	PDGFRA	2.15711	1.66e-20	6.57e-19	up
ENSGALG00000012865	BRAF	1.15962	6.68e-10	4.91e-09	up
ENSGALG00000015022	FYN	1.01064	1.34e-18	3.89e-17	up
ENSGALG00000005628	COL9A3	1.30203	4.17e-12	4.43e-11	down
ENSGALG00000005079	VCL	1.14276	1.68e-15	3.02e-14	up
ENSGALG00000017091	FLT1	2.01386	4.25e-37	1.57e-34	up
ENSGALG00000006390	CRKL	1.11078	1.28e-36	4.56e-34	up
ENSGALG00000009992	ARHGAP5	1.26601	1e-10	8.5e-10	up
ENSGALG00000003428	protein_coding	1.57141	1.39e-38	5.84e-36	up
ENSGALG00000007646	protein_coding	3.4391	4.22e-63	2.6e-59	up
ENSGALG00000001501	MAPK1	1.81846	1.99e-20	7.78e-19	up
ENSGALG00000012456	RAC2	1.11025	0.000389886	0.00109693	up
ENSGALG00000017272	VWF	1.16811	3.92e-13	4.9e-12	up
ENSGALG00000008491	XIAP	1.29901	9.67e-08	5.08e-07	up
ENSGALG00000004526	TNR	1.91359	5.34e-13	6.54e-12	up
ENSGALG00000002655	ITGAV	2.54721	5.61e-31	9.52e-29	up
ENSGALG00000002656	CRK	1.5018	8.33e-08	4.42e-07	up

## Sheet: Table S6
The DEGs related to cytokine-cytokine receptor interaction in in this study
Gene ID	Gene name	log2FoldChange	pvalue	padj	trend
ENSGALG00000005638	IL2RG	1.13399	9.27e-05	0.000293553	up
ENSGALG00000006346	CXCL14	1.29796	1.01e-18	3.03e-17	up
ENSGALG00000013929	PDGFRA	2.15711	1.66e-20	6.57e-19	up
ENSGALG00000007174	TNFSF15	1.93644	1.16e-05	4.31e-05	up
ENSGALG00000016852	TNFSF13B	2.74459	2.52e-25	2.07e-23	up
ENSGALG00000011808	CCR9	2.58392	4.19e-08	2.33e-07	up
ENSGALG00000007668	BMP7	1.30656	9.29e-19	2.8e-17	up
ENSGALG00000014716	IL6ST	1.7946	1.39e-38	5.84e-36	up
ENSGALG00000013869	IL20RA	1.01824	0.00177388	0.00440247	up
ENSGALG00000017119	TNFRSF19	1.06091	1.13e-06	5e-06	up
ENSGALG00000028256	CCL19	1.50342	0.00254111	0.00610996	up
ENSGALG00000013372	IL7R	2.44484	4.07e-25	3.27e-23	up
ENSGALG00000011733	CCR2	2.75428	3.43e-24	2.46e-22	up
ENSGALG00000026098	IL8	1.74301	6.04e-05	0.000197808	up
ENSGALG00000011735	XCR1	1.79943	1.64e-06	7.03e-06	up
ENSGALG00000011734	CCR8L	1.832	0.00374527	0.00869574	up
ENSGALG00000026663	CX3CL1	1.54455	1.75e-13	2.3e-12	up
ENSGALG00000013865	IFNGR1	1.92744	7.7e-15	1.27e-13	up
ENSGALG00000007874	IL18	1.2033	2.93e-06	1.21e-05	up
ENSGALG00000019322	TNFRSF13C	3.32659	8.24e-11	7.09e-10	up
ENSGALG00000007121	TNFSF8	2.82226	2.14e-07	1.07e-06	up
ENSGALG00000002003	BMPR1A	1.18731	5.64e-08	3.08e-07	up
ENSGALG00000006318	IL21R	1.39707	0.0117845	0.0243574	up
ENSGALG00000008459	BMPR2	1.02884	1.32e-09	9.27e-09	up
ENSGALG00000017091	FLT1	2.01386	4.25e-37	1.57e-34	up
ENSGALG00000025876	THPO	1.28507	0.000162196	0.000490403	down
ENSGALG00000007646	protein_coding	3.4391	4.22e-63	2.6e-59	up
ENSGALG00000003733	LIFR	1.09735	2.47e-15	4.33e-14	up
ENSGALG00000011418	CCR6	2.7553	1.06e-20	4.3e-19	up
ENSGALG00000001409	IL12B	1.93025	0.025605	0.0487673	down
ENSGALG00000009904	IL22	2.35758	2.77e-05	9.65e-05	up
ENSGALG00000014855	GHR	1.39049	2.62e-06	1.09e-05	up
ENSGALG00000001882	TNFRSF18	1.47968	1.78e-06	7.59e-06	up
ENSGALG00000026163	TNFSF11	3.21603	4.6e-24	3.23e-22	up
ENSGALG00000011668	IL8L1	1.46253	0.000164053	0.000495452	up
ENSGALG00000026207	CNTF	1.04979	3.4e-13	4.28e-12	down

## Sheet: Table S7
gene name	gene ID	#Term	Database	ID	Hyperlink
MBOAT2	ENSGALG00000016412	Glycerolipid metabolism	KEGG PATHWAY	gga00561	http://www.genome.jp/kegg-bin/show_pathway?gga00561/gga:421925%09red
		Metabolic pathways	KEGG PATHWAY	gga01100	http://www.genome.jp/kegg-bin/show_pathway?gga01100/gga:101751177%09red/gga:421925%09red/gga:423769%09red
ALOX5	ENSGALG00000005857	Arachidonic acid metabolism	KEGG PATHWAY	gga00590	http://www.genome.jp/kegg-bin/show_pathway?gga00590/gga:423769%09red
		Metabolic pathways	KEGG PATHWAY	gga01100	http://www.genome.jp/kegg-bin/show_pathway?gga01100/gga:101751177%09red/gga:421925%09red/gga:423769%09red
IPMK	ENSGALG00000002710	Inositol phosphate metabolism	KEGG PATHWAY	gga00562	http://www.genome.jp/kegg-bin/show_pathway?gga00562/gga:101751177%09red
		Phosphatidylinositol signaling system	KEGG PATHWAY	gga04070	http://www.genome.jp/kegg-bin/show_pathway?gga04070/gga:101751177%09red
		Metabolic pathways	KEGG PATHWAY	gga01100	http://www.genome.jp/kegg-bin/show_pathway?gga01100/gga:101751177%09red/gga:421925%09red/gga:423769%09red
IL18	ENSGALG00000007874	Cytosolic DNA-sensing pathway	KEGG PATHWAY	gga04623	http://www.genome.jp/kegg-bin/show_pathway?gga04623/gga:395312%09red
		Salmonella infection	KEGG PATHWAY	gga05132	http://www.genome.jp/kegg-bin/show_pathway?gga05132/gga:395312%09red
		Influenza A	KEGG PATHWAY	gga05164	http://www.genome.jp/kegg-bin/show_pathway?gga05164/gga:395312%09red
		NOD-like receptor signaling pathway	KEGG PATHWAY	gga04621	http://www.genome.jp/kegg-bin/show_pathway?gga04621/gga:395312%09red
ANGPTL4	ENSGALG00000000619	PPAR signaling pathway	KEGG PATHWAY	gga03320	http://www.genome.jp/kegg-bin/show_pathway?gga03320/gga:769087%09red
PTPRJ	ENSGALG00000006382	Adherens junction	KEGG PATHWAY	gga04520	http://www.genome.jp/kegg-bin/show_pathway?gga04520/gga:395330%09red
CTLA4	ENSGALG00000008666	Cell adhesion molecules (CAMs)	KEGG PATHWAY	gga04514	http://www.genome.jp/kegg-bin/show_pathway?gga04514/gga:424106%09red
NPY2R	ENSGALG00000009280	Neuroactive ligand-receptor interaction	KEGG PATHWAY	gga04080	http://www.genome.jp/kegg-bin/show_pathway?gga04080/gga:422405%09red
RYR3	ENSGALG00000009705	Calcium signaling pathway	KEGG PATHWAY	gga04020	http://www.genome.jp/kegg-bin/show_pathway?gga04020/gga:396111%09red
PCSK1	ENSGALG00000014681
PTX3	ENSGALG00000028284
SLC16A6	ENSGALG00000004162
SLC6A17	ENSGALG00000000394
IRF4	ENSGALG00000012830
SLA	ENSGALG00000039264
TNFRSF11A	ENSGALG00000045642
TSPAN14	ENSGALG00000002414
LGR6	ENSGALG00000000568
TPM4	ENSGALG00000002563
EVI2A	ENSGALG00000039084
PLAGL2	ENSGALG00000006586
ZC3H12A	ENSGALG00000002021
TSPAN18	ENSGALG00000036901
SMCR8	ENSGALG00000024082
MYL1	ENSGALG00000002907
CCDC157	ENSGALG00000007907
SLC1A2	ENSGALG00000037556
CORO2A	ENSGALG00000001933
PANX3	ENSGALG00000021443
TRIM63	ENSGALG00000034107
KCTD21	ENSGALG00000017268
VGLL1	ENSGALG00000006412
DUSP13	ENSGALG00000005017
KIAA1958	ENSGALG00000023083
MCTP1	ENSGALG00000014668
ST6GALNAC2	ENSGALG00000001883
CRYBA1	ENSGALG00000004035
BTBD19	ENSGALG00000028978
RAB23	ENSGALG00000016279
CCNF	ENSGALG00000038502
BARD1	ENSGALG00000003484
DNAJC21	ENSGALG00000003387
TMTC4	ENSGALG00000016870
KIF26B	ENSGALG00000010664
REEP1	ENSGALG00000015786
EXOSC1	ENSGALG00000039917
KCND2	ENSGALG00000009066
CMPK2	ENSGALG00000028982
ZBTB11	ENSGALG00000015334
RHOJ	ENSGALG00000011855
USP49	ENSGALG00000003461
FAM84B	ENSGALG00000041233
BARD1	ENSGALG00000003484
NR3C1	ENSGALG00000032992
GPR141	ENSGALG00000032363
CLK1	ENSGALG00000028438
PCDH7	ENSGALG00000033883
GPATCH2L	ENSGALG00000010350
